# Supplementary material for: Highly selective organo-gallium hydroxamate mediated inhibition of antibiotic resistant Klebsiella pneumoniae
Source: Royal Society of Chemistry journal article supplement (doi:10.1039/d4dt02440k), 2024-11-11
Supplement: d4dt02440k1.pdf [file d4dt02440k1.pdf]

## Highly selective organo-gallium hydroxamate mediated inhibition of antibiotic resistant *Klebsiella pneumoniae*

Rebekah N Duffin, Jenisi TA Kelderman, Megan E Herdman and Philip C Andrews

School of Chemistry, Monash University, Clayton, Melbourne, VIC, Australia 3800

1.  $^1\text{H}$  and  $^{13}\text{C}$  NMR Spectroscopy of gallium complexes
2. FT-IR Spectra of Metal Complexes **1 – 6**
3. High Resolution ESI-MS on Metal Complexes **1 – 6**
4. Additional Analytical Data
5. Biological Testing
6. Experimental Section for Complexes **7, 8, 9** and **10**
7. X-ray Crystallography
8. Biological Images

# 1. $^1\text{H}$ and $^{13}\text{C}$ NMR Spectroscopy of Gallium Complexes

$^1\text{H}$  NMR  $[\text{Ga}(\text{BPHA})_3]$  **1** in  $\text{d}_6$  – DMSO

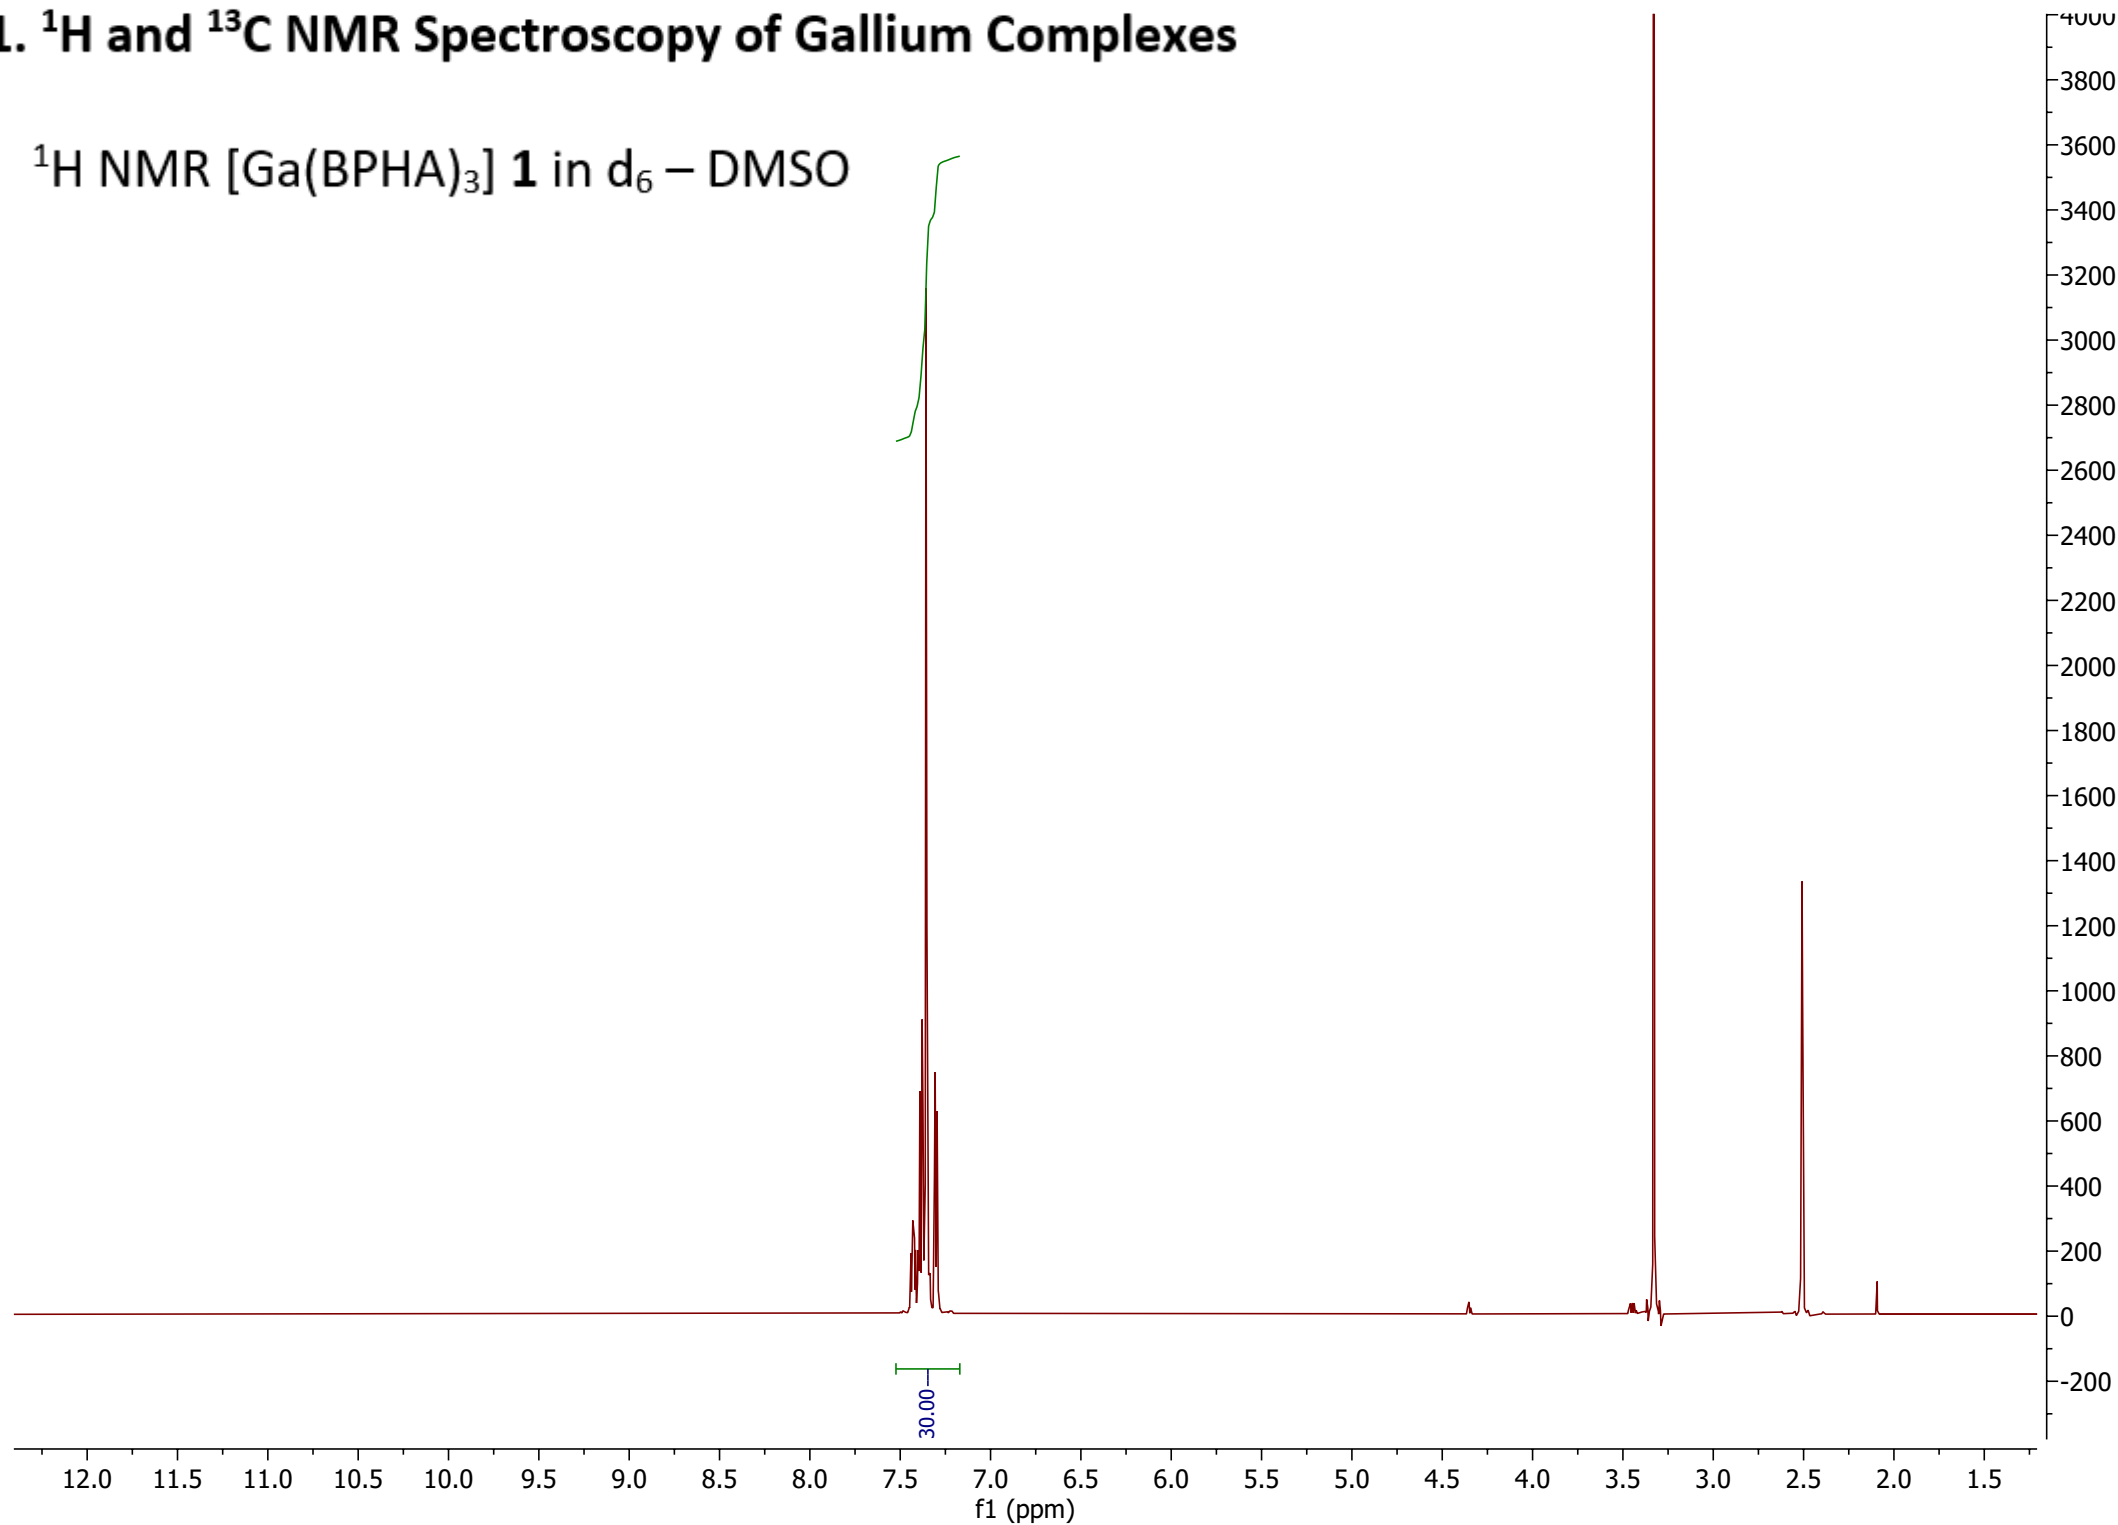

$^{13}\text{C}$  NMR [Ga(BPHA)<sub>3</sub>] **1** in d<sub>6</sub> – DMSO

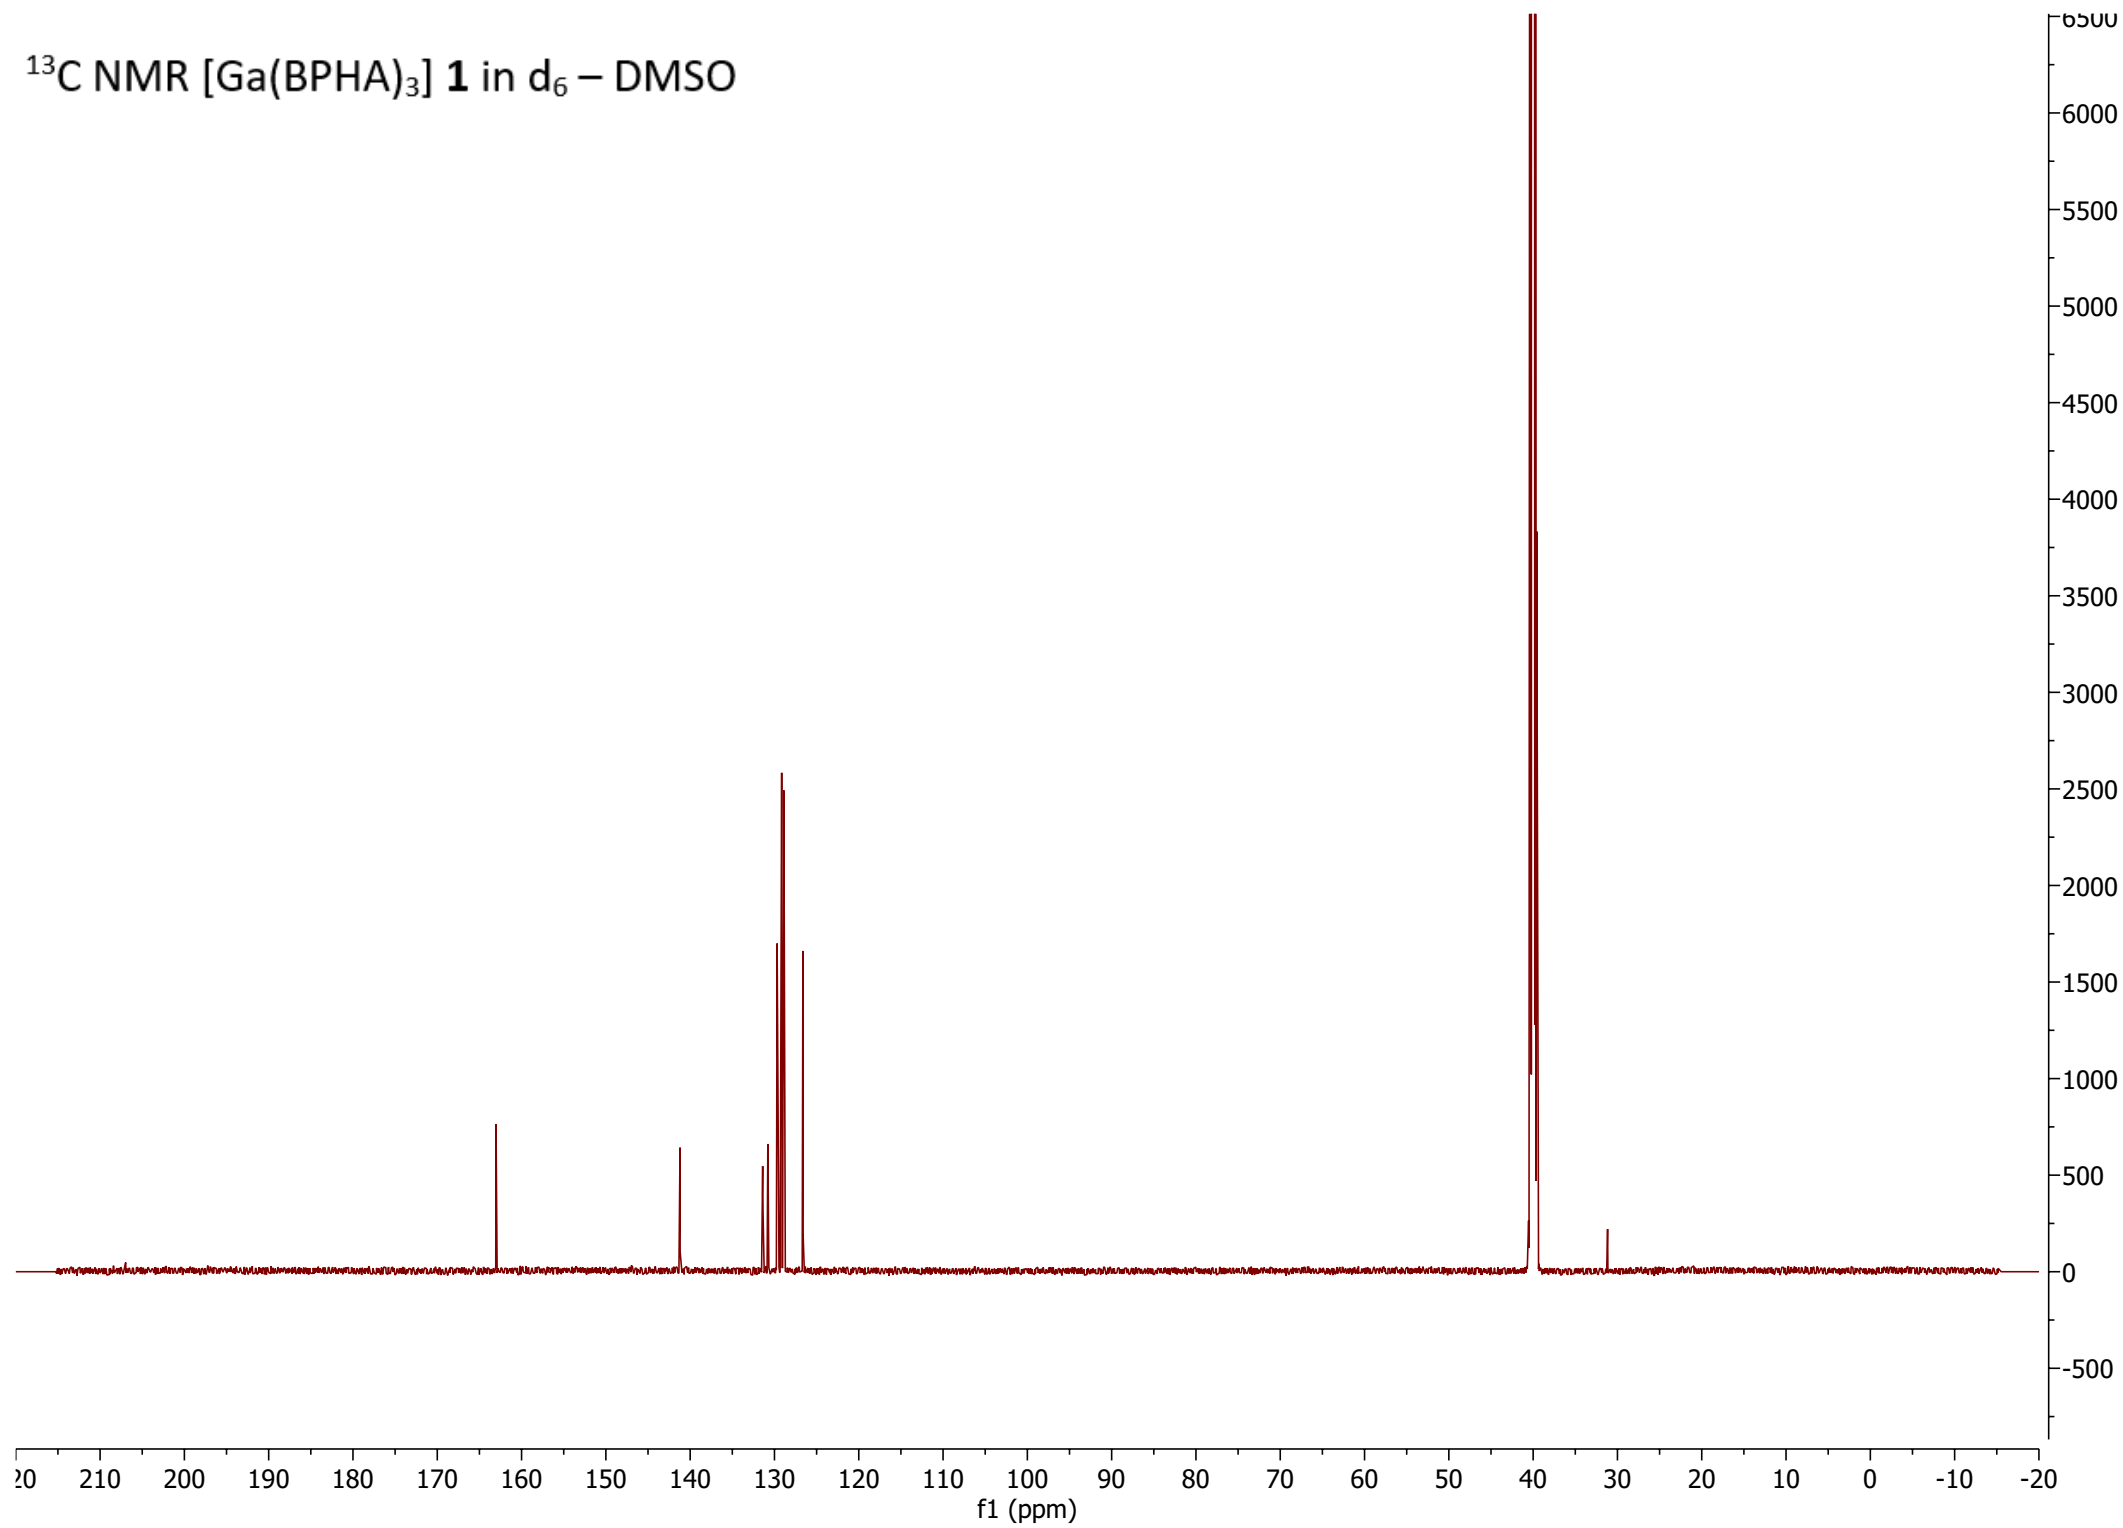

<sup>1</sup>H NMR [Ga(BHA-*H*)<sub>3</sub>] **2** in d<sub>6</sub> – DMSO

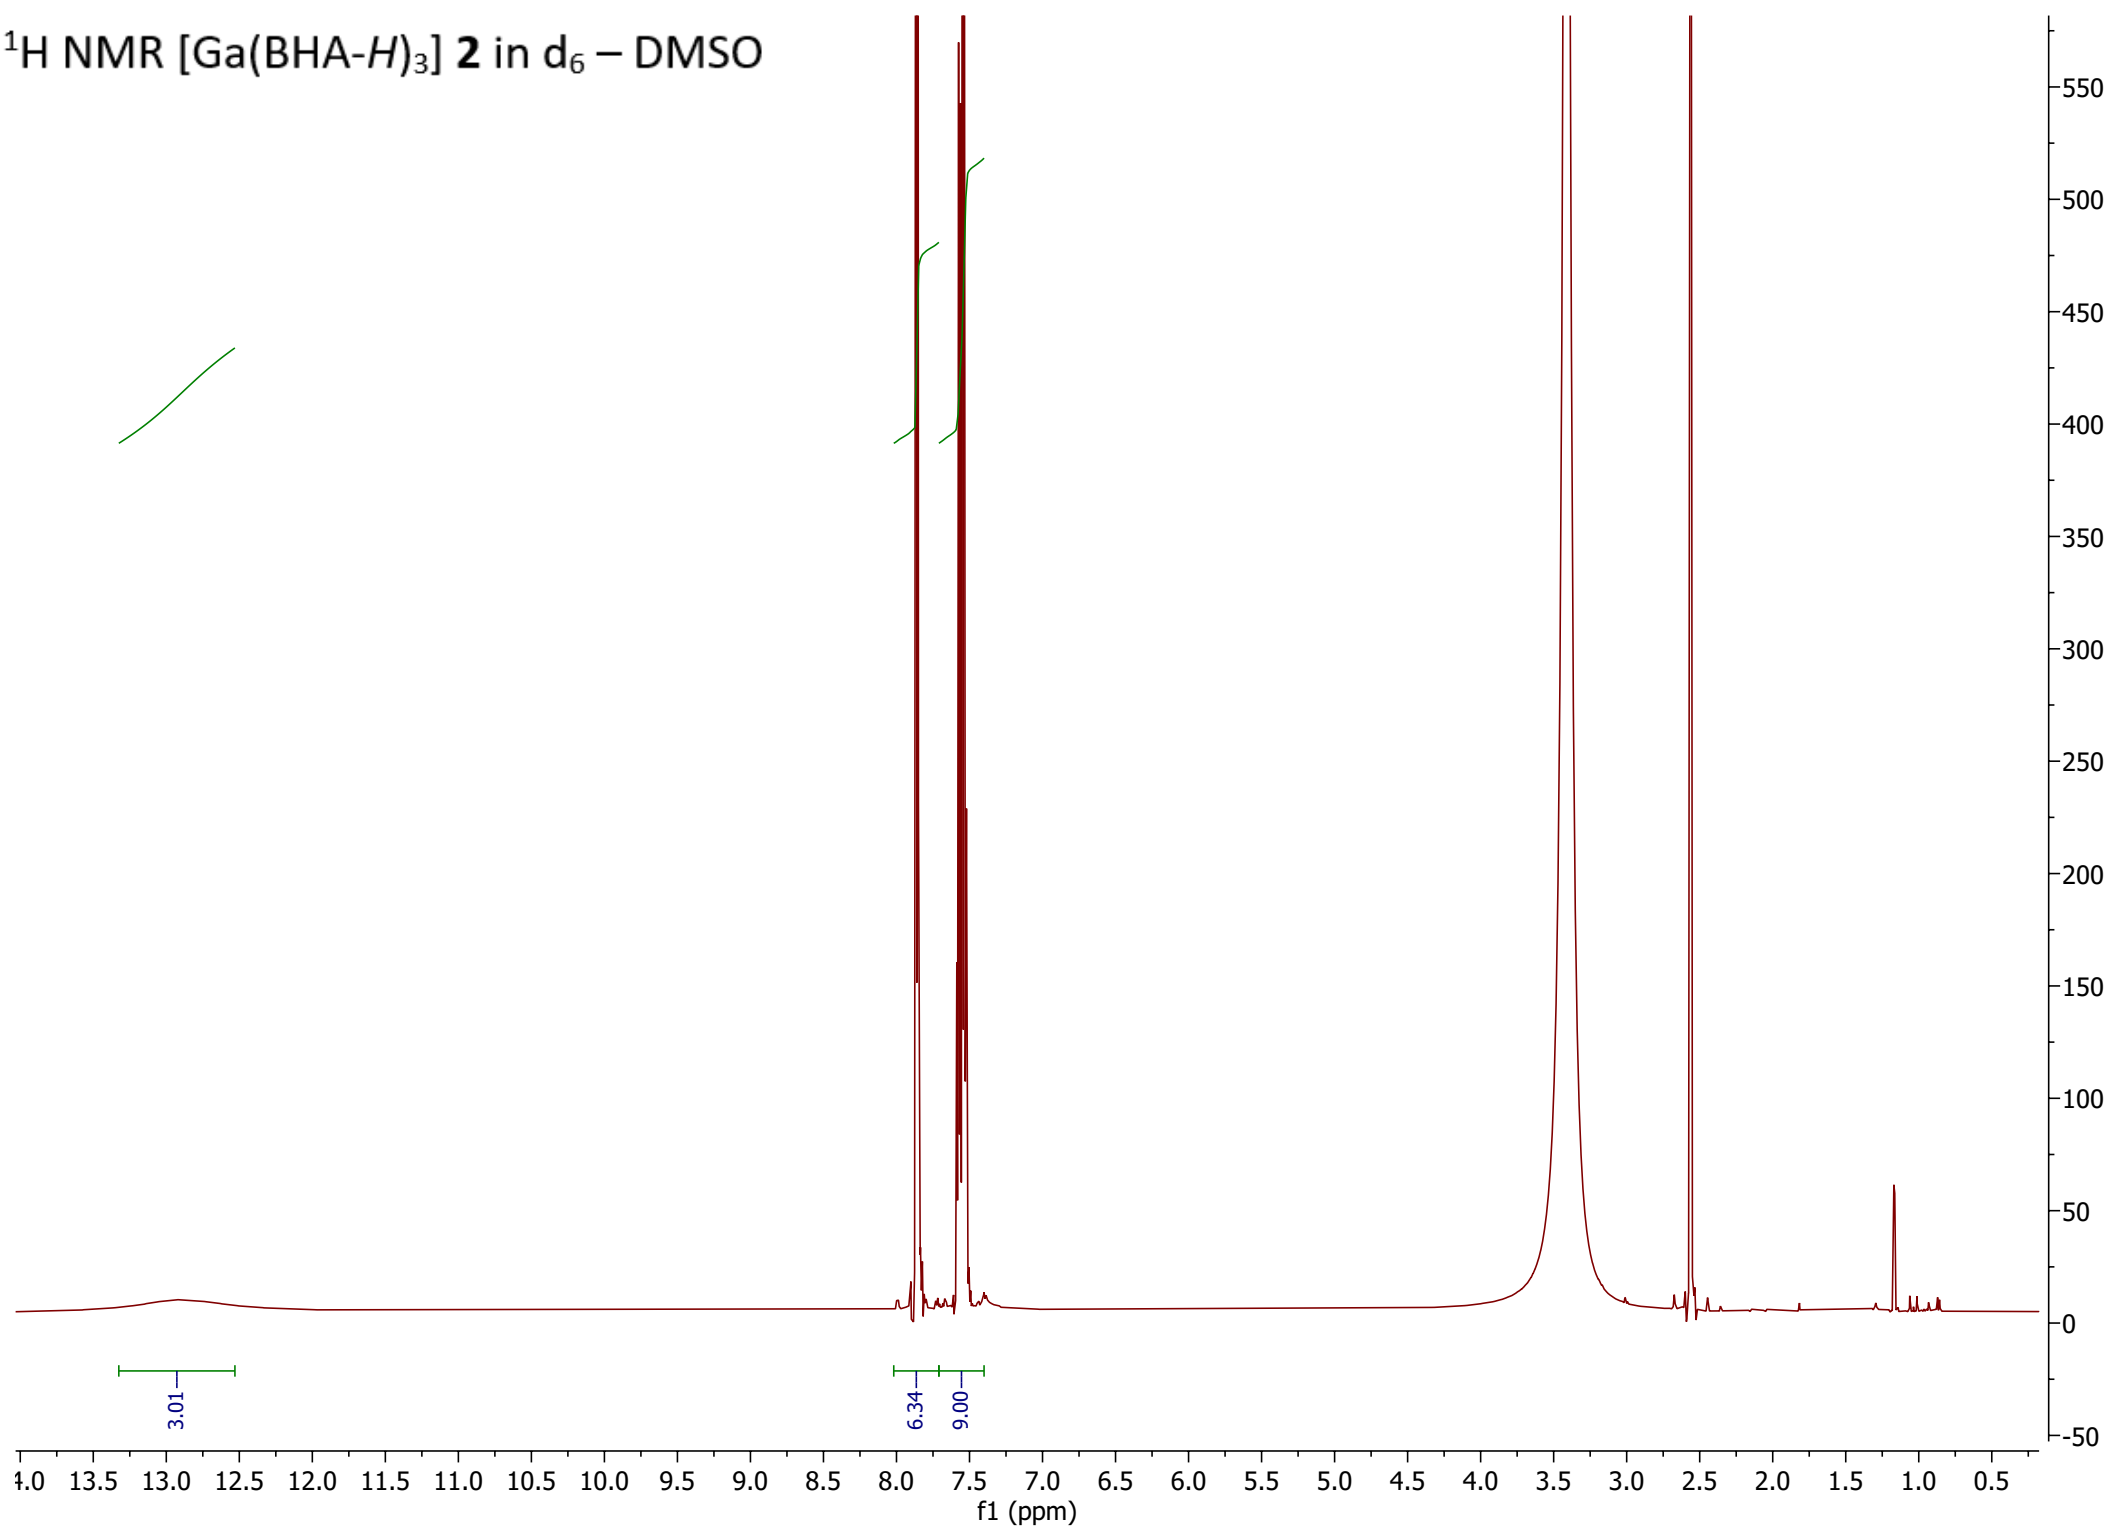

$^{13}\text{C}$  NMR [Ga(BHA-*H*)<sub>3</sub>] **2** in d<sub>6</sub> – DMSO

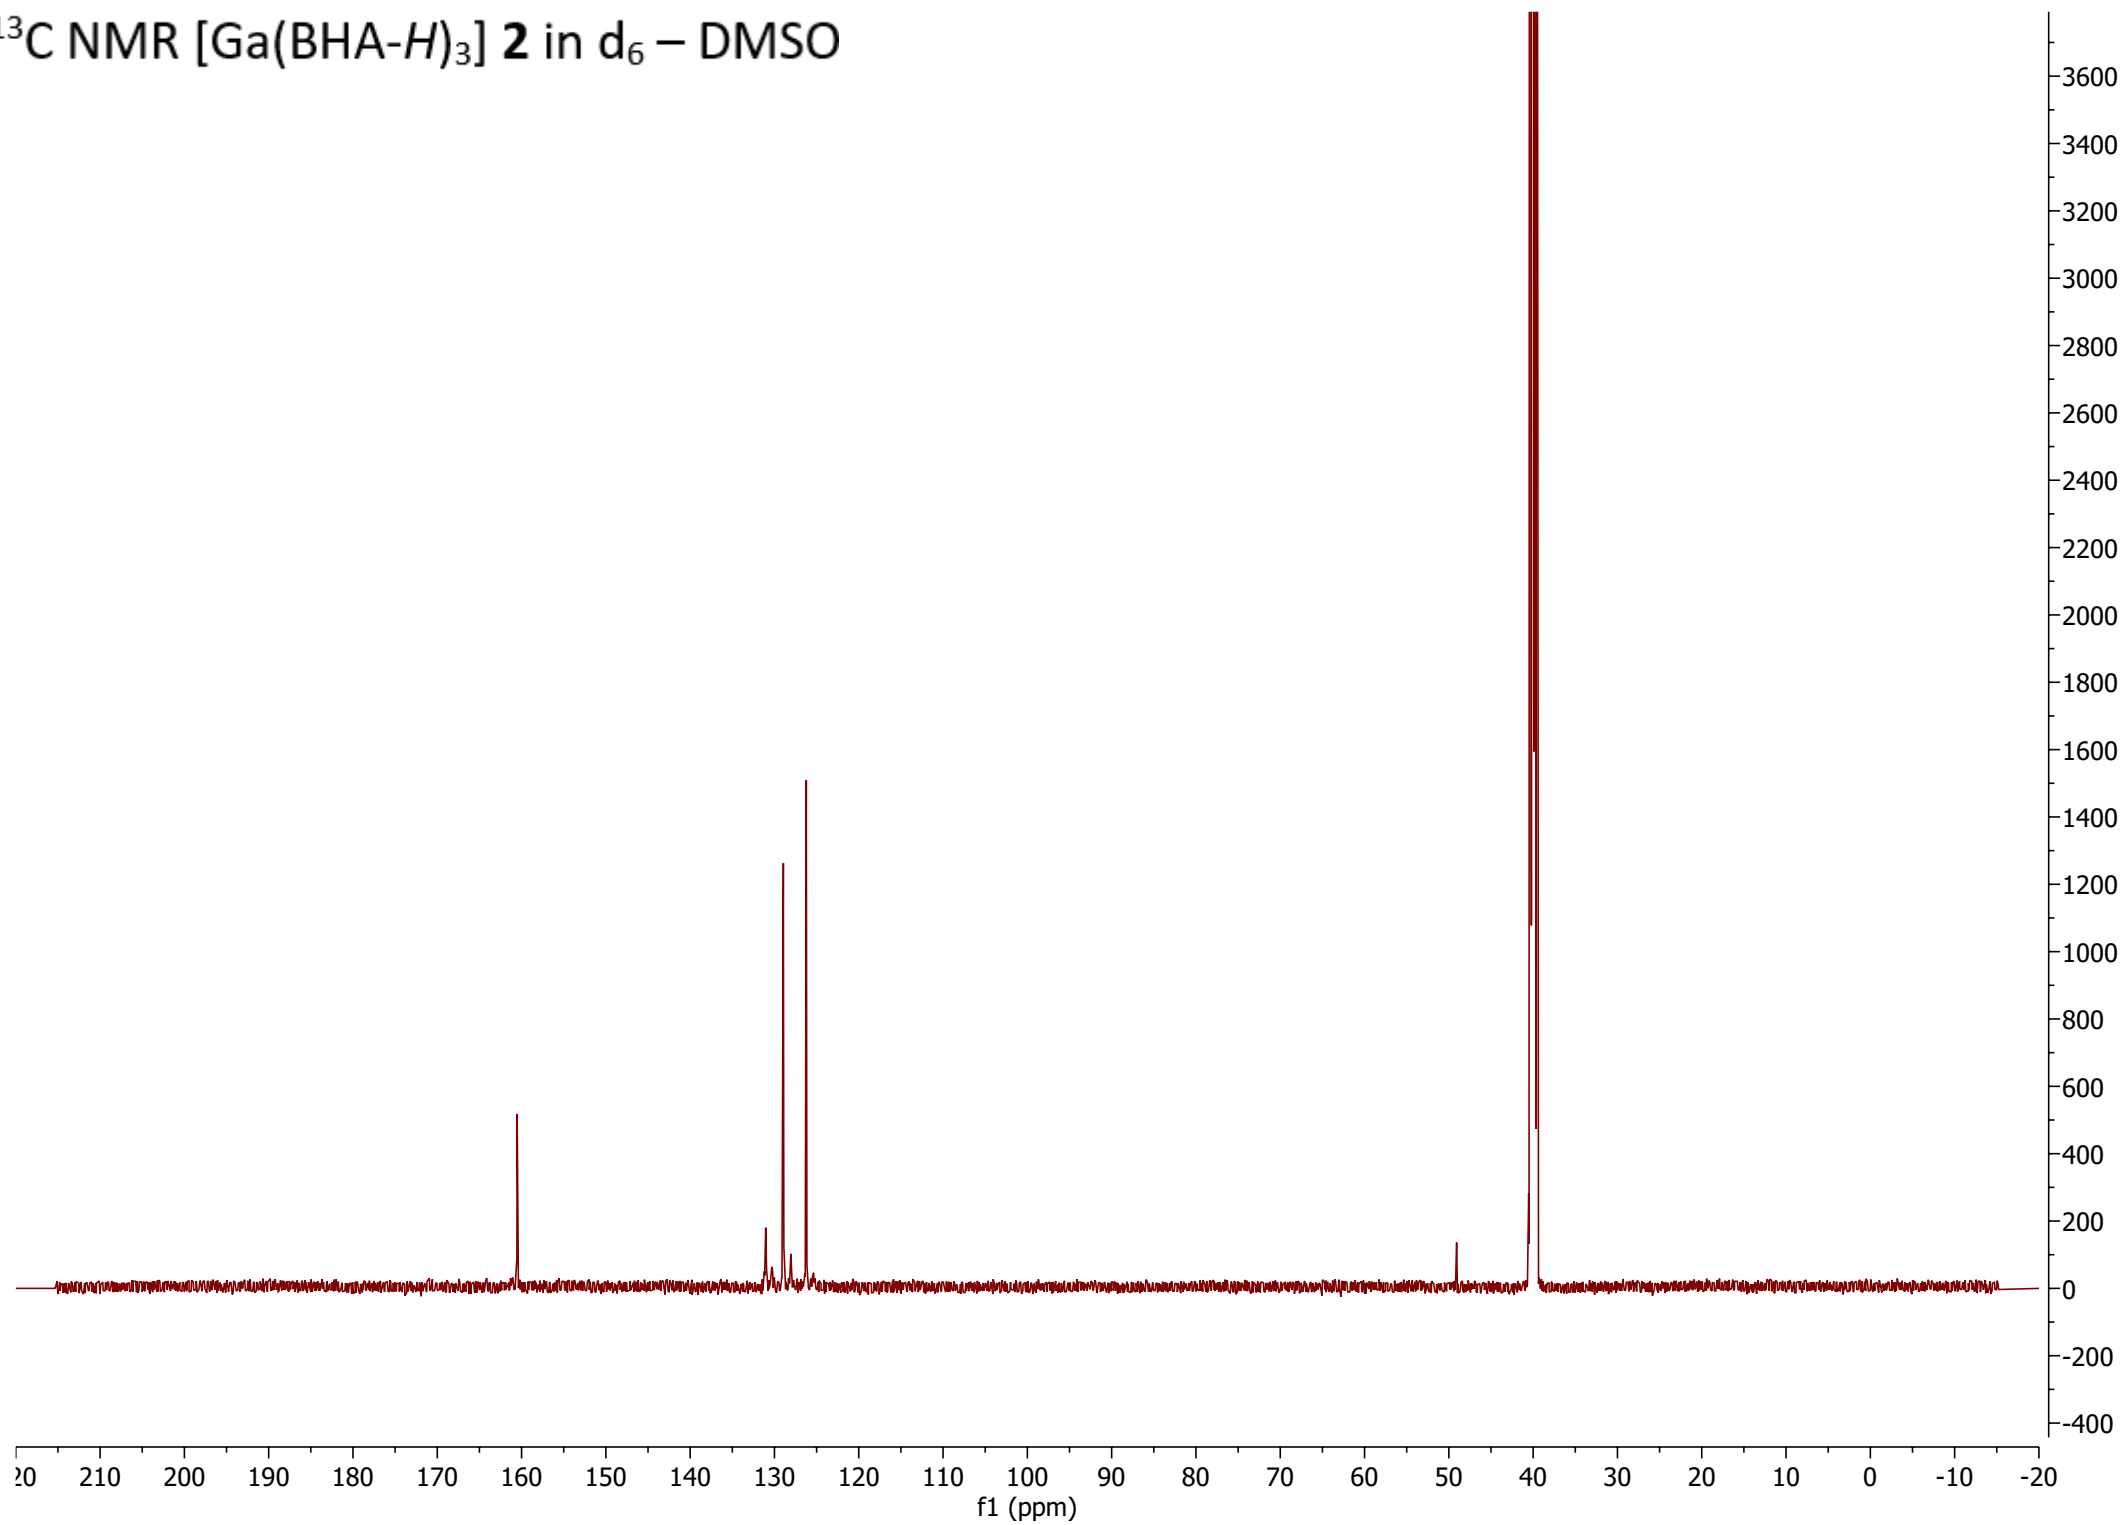

$^1\text{H}$  NMR  $[\text{Ga}(\text{SHA-}H_2)(\text{SHA-}H)]$  **3** and  $[\text{Ga}(\text{SHA-}H)_3]$  in  $\text{d}_6$  – DMSO

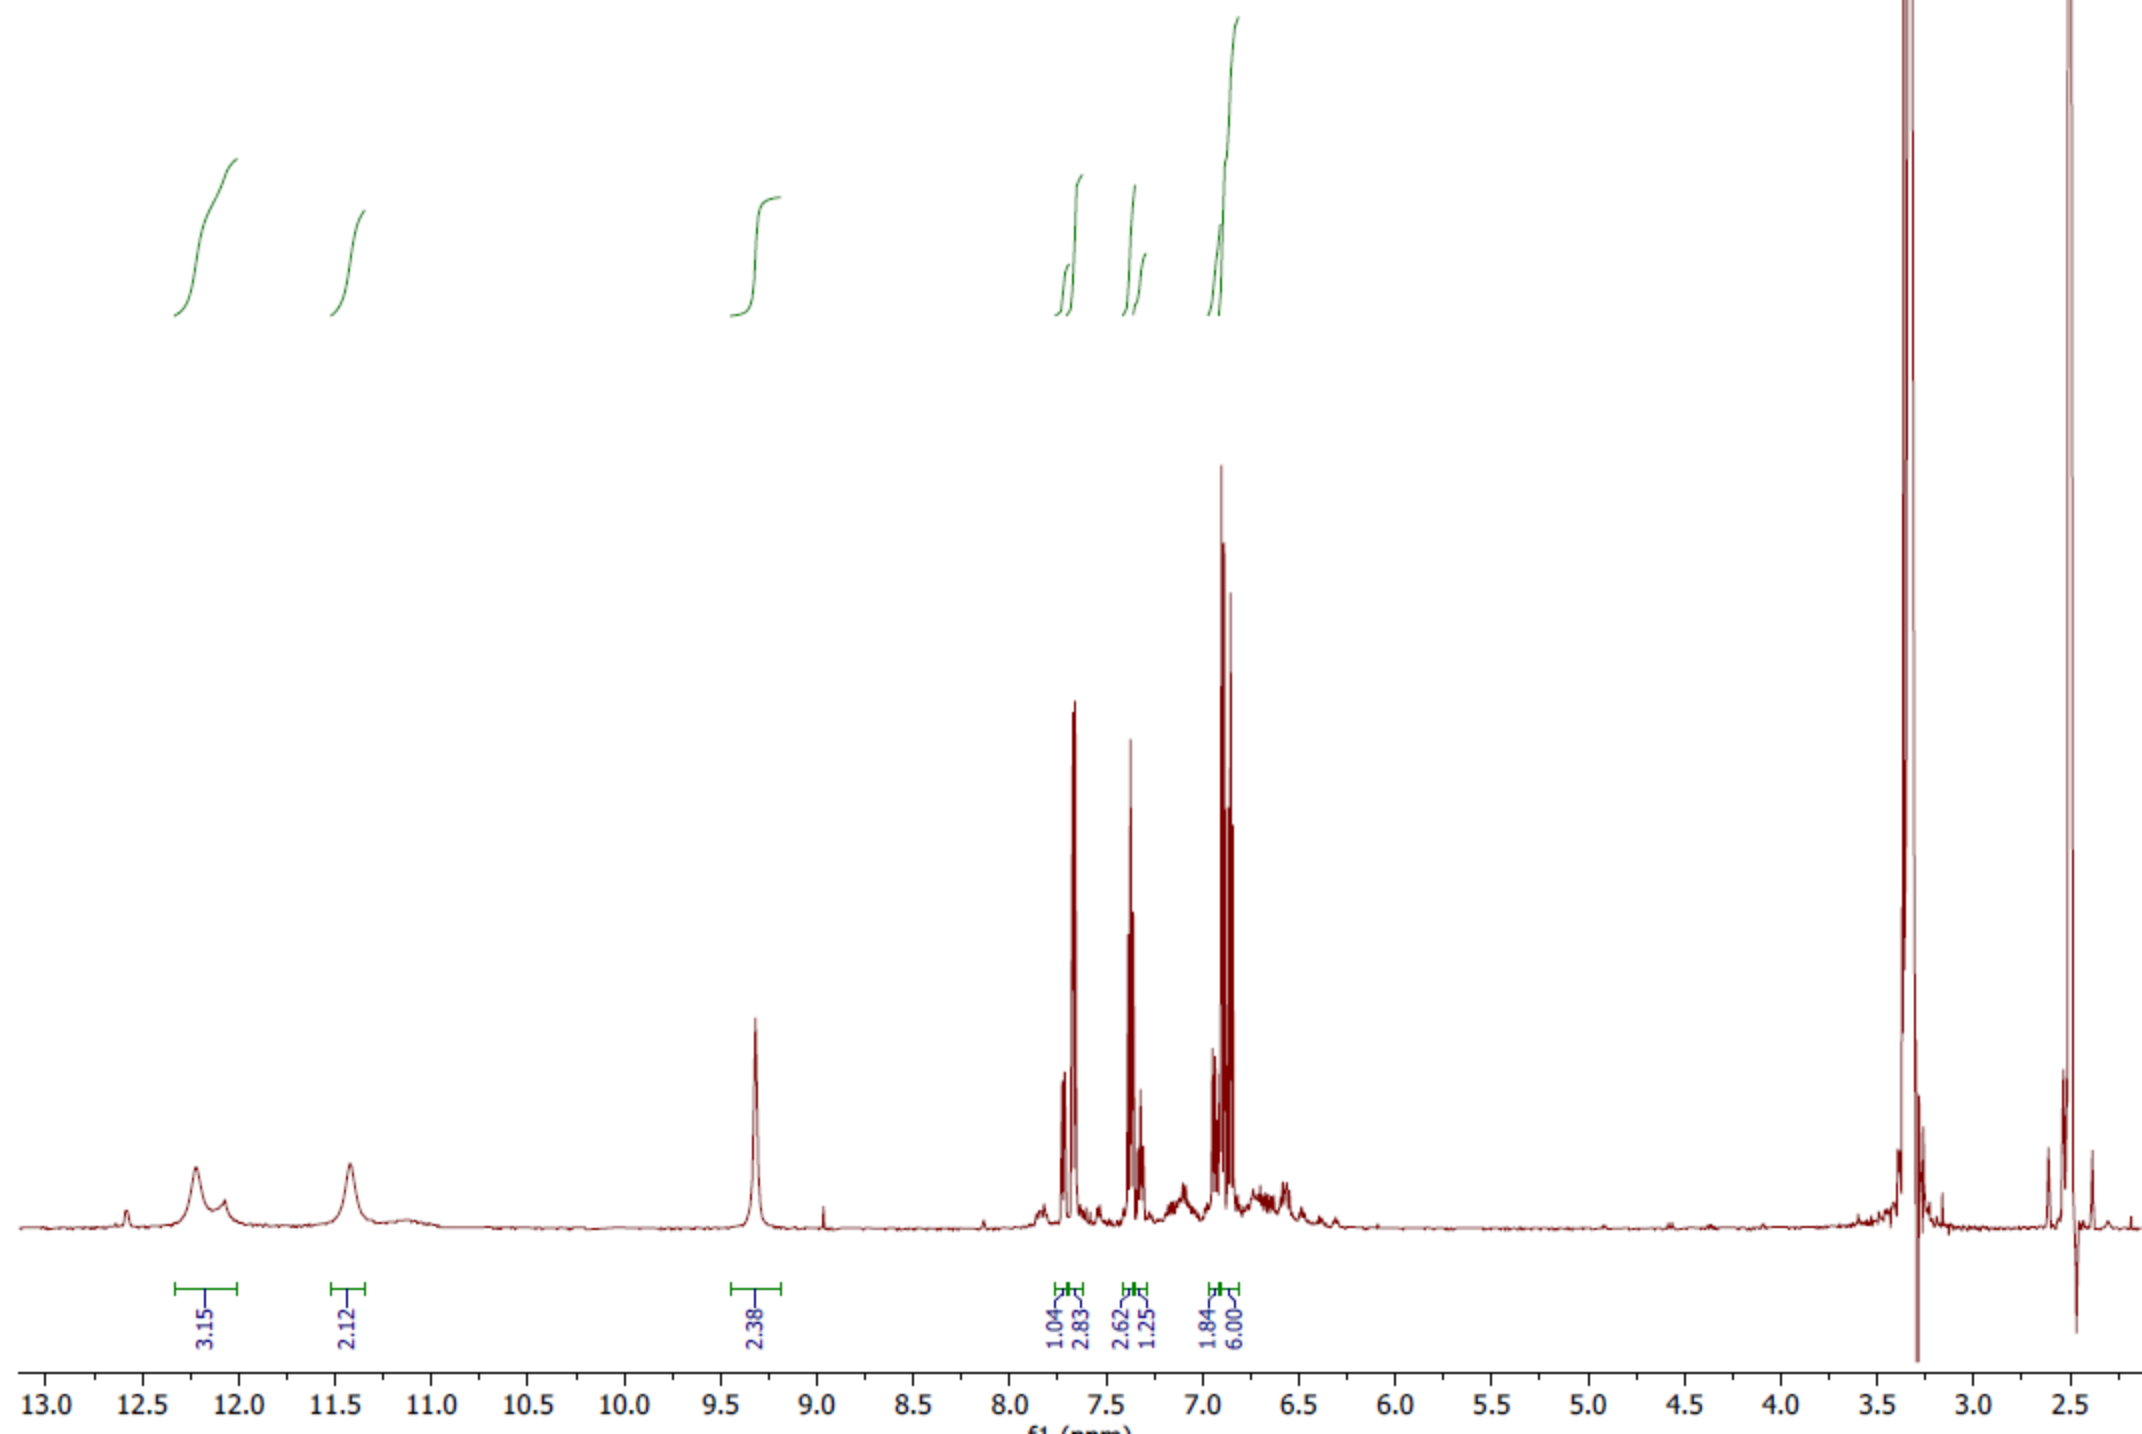

$^{13}\text{C}$  NMR  $[\text{Ga}(\text{SHA-}H_2)(\text{SHA-}H)]$  **3** and  $[\text{Ga}(\text{SHA-}H)_3]$  in  $\text{d}_6$  – DMSO

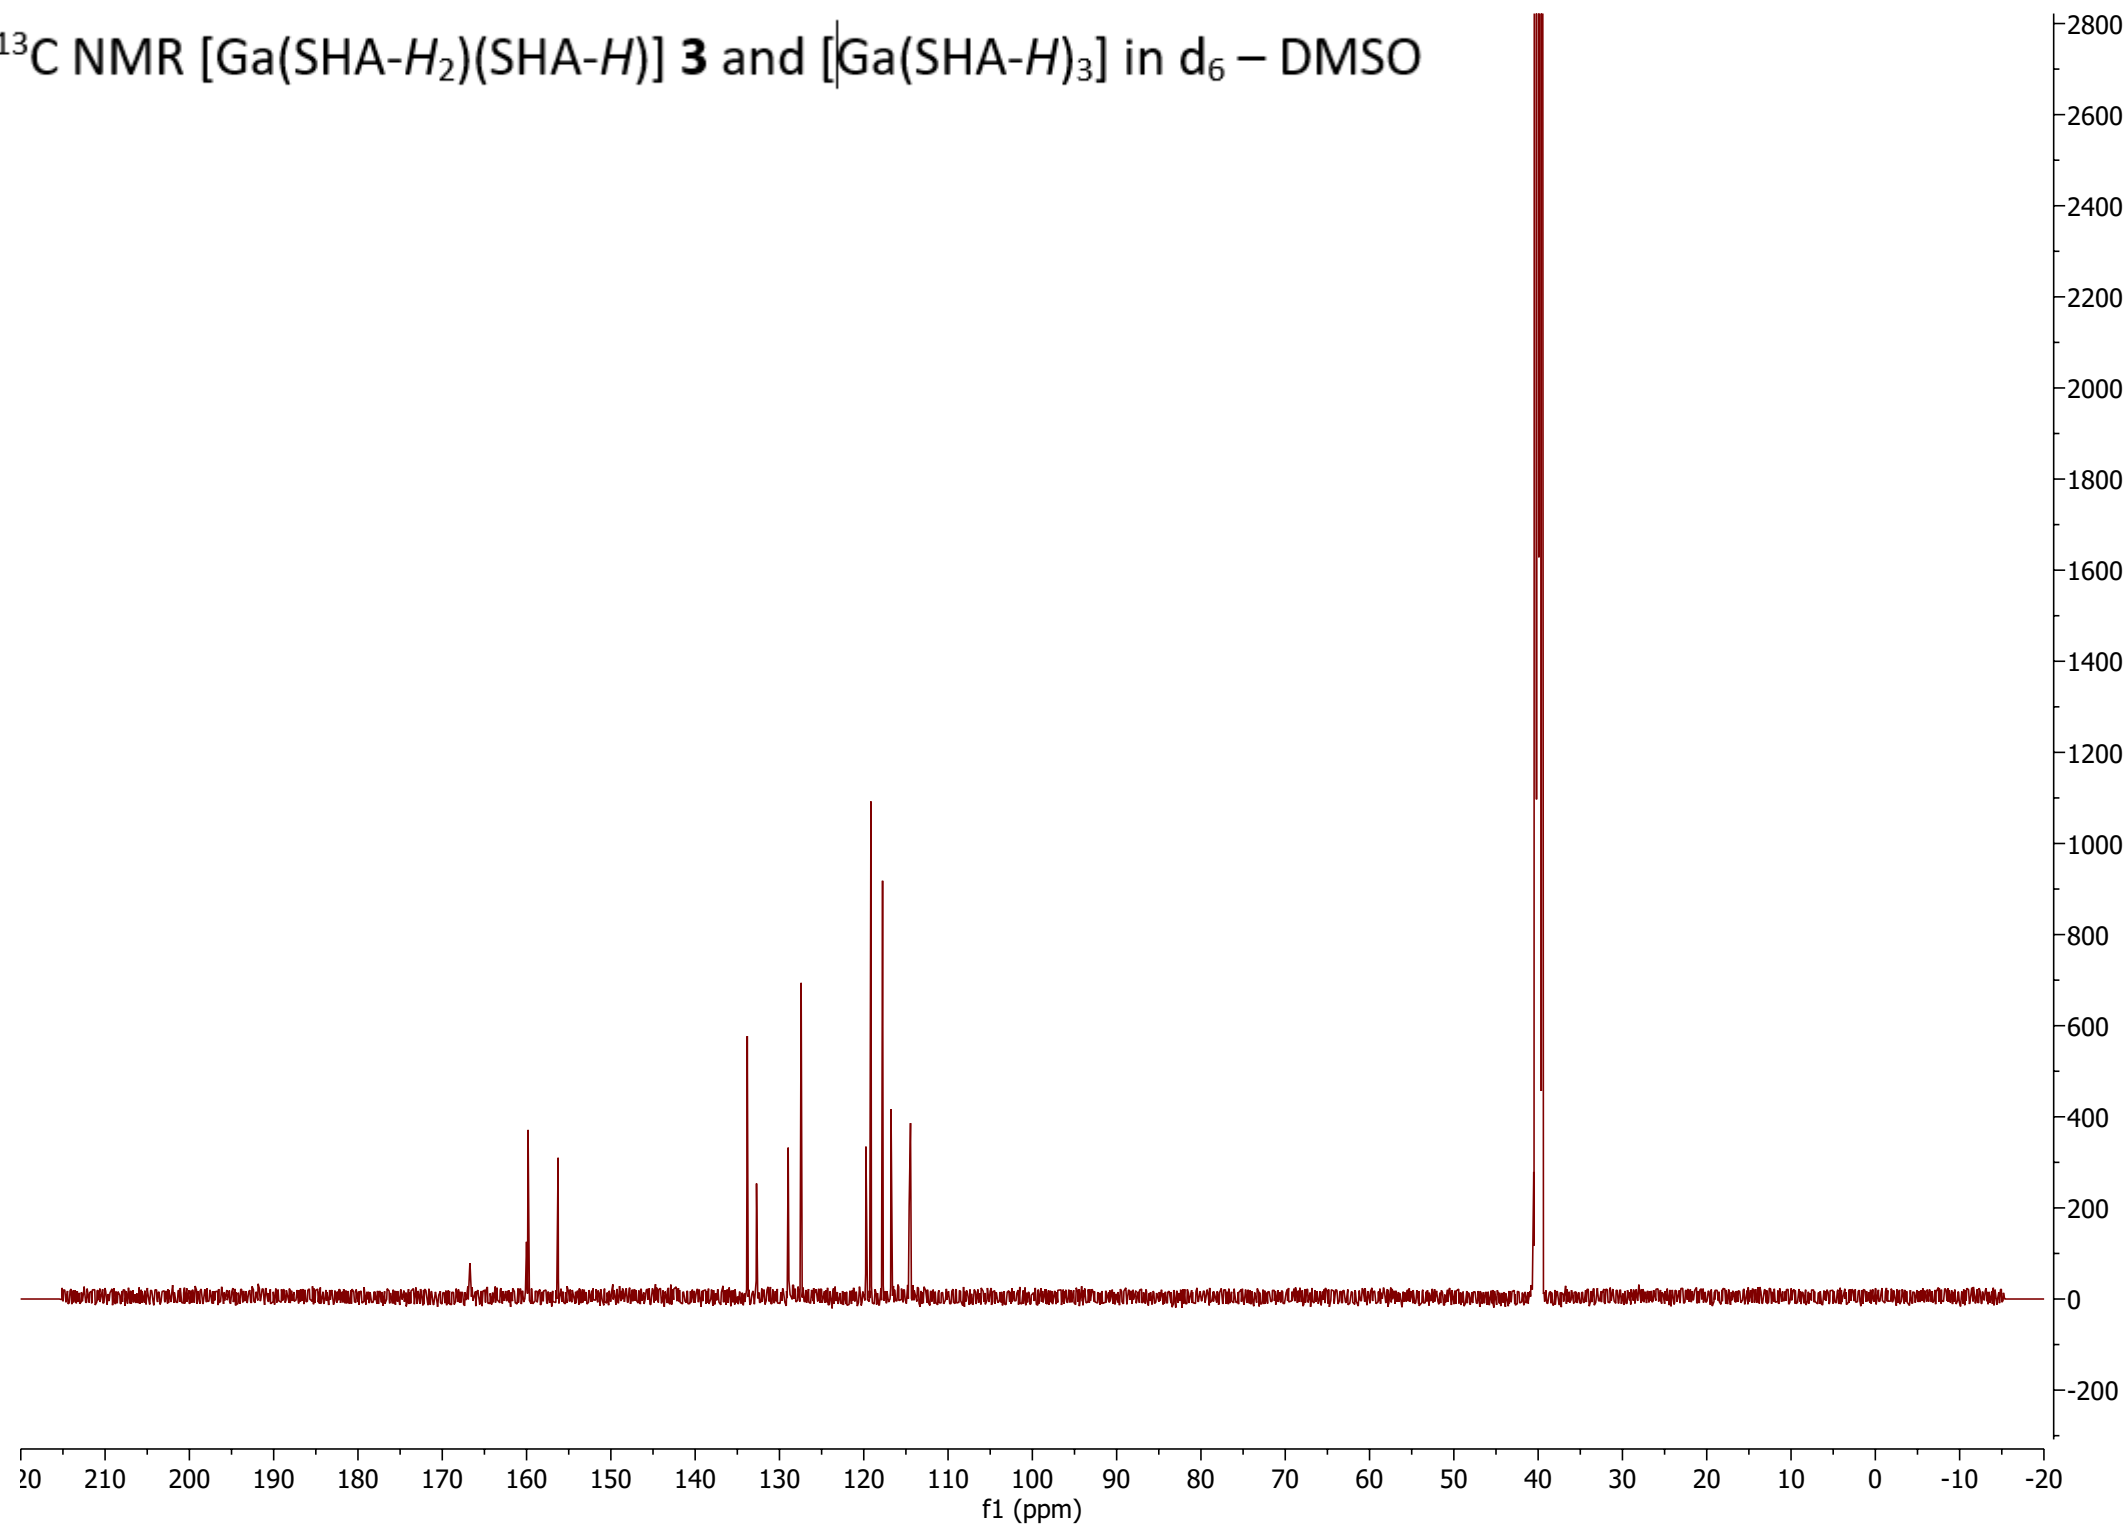

<sup>1</sup>H NMR [GaMe<sub>2</sub>(BPHA)] **4** in d<sub>6</sub> – DMSO

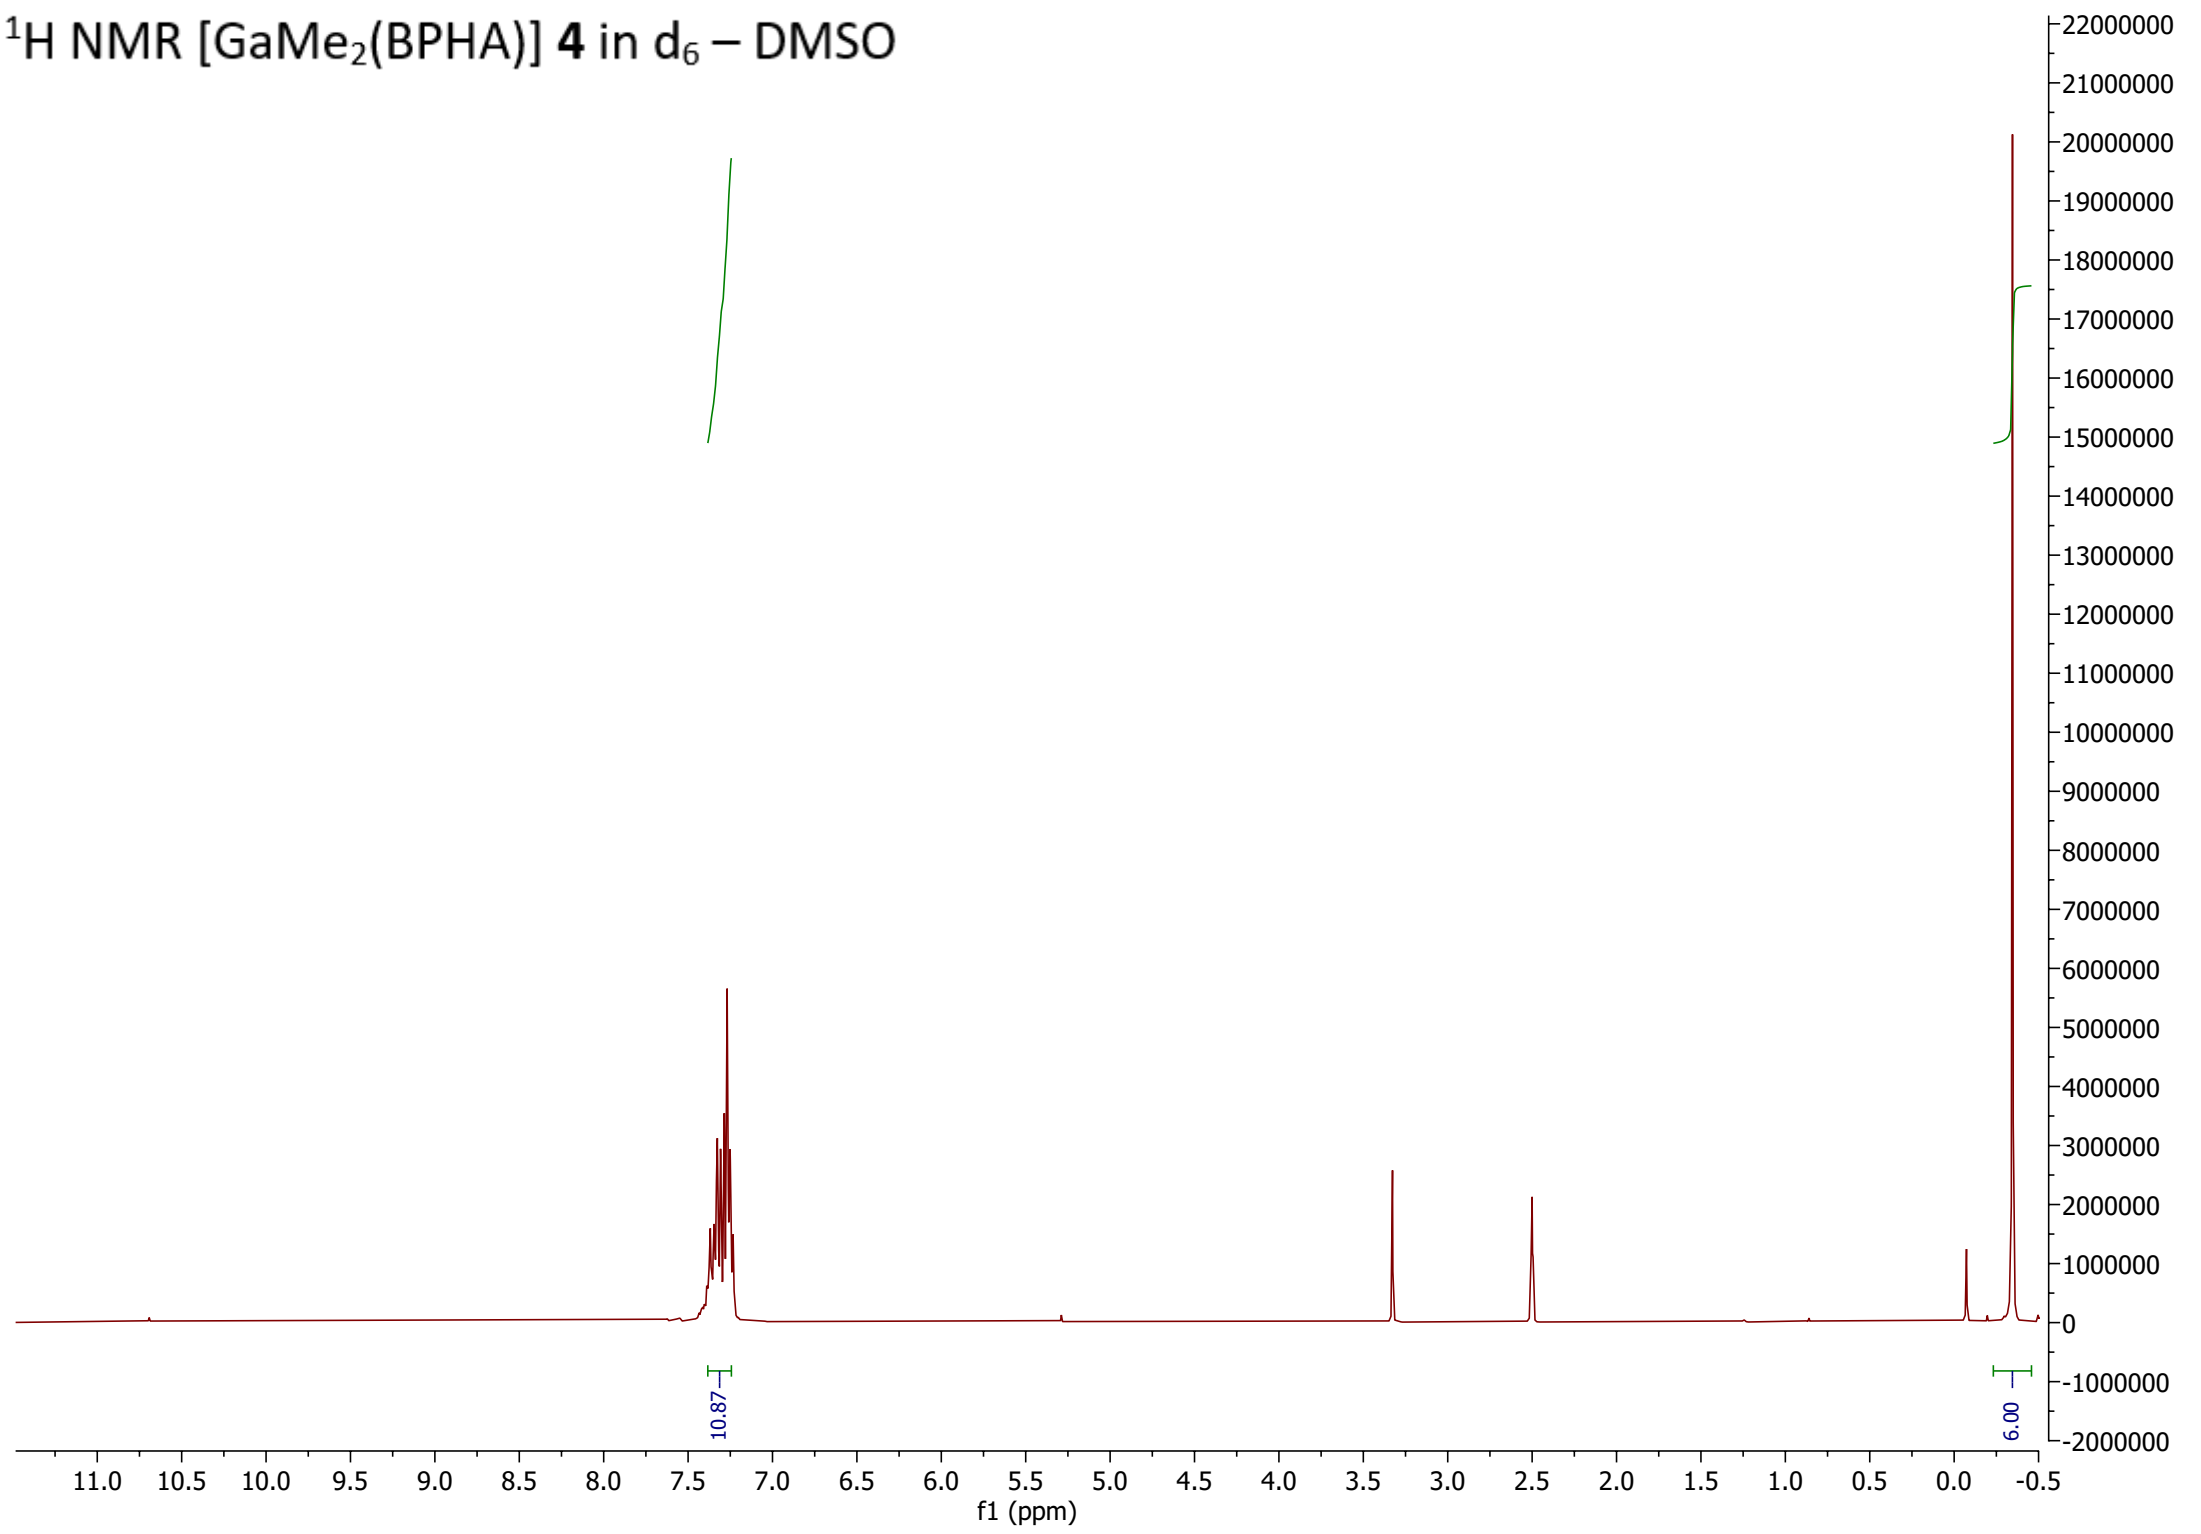

$^{13}\text{C}$  NMR [GaMe<sub>2</sub>(BPHA)] **4** in d<sub>6</sub> – DMSO

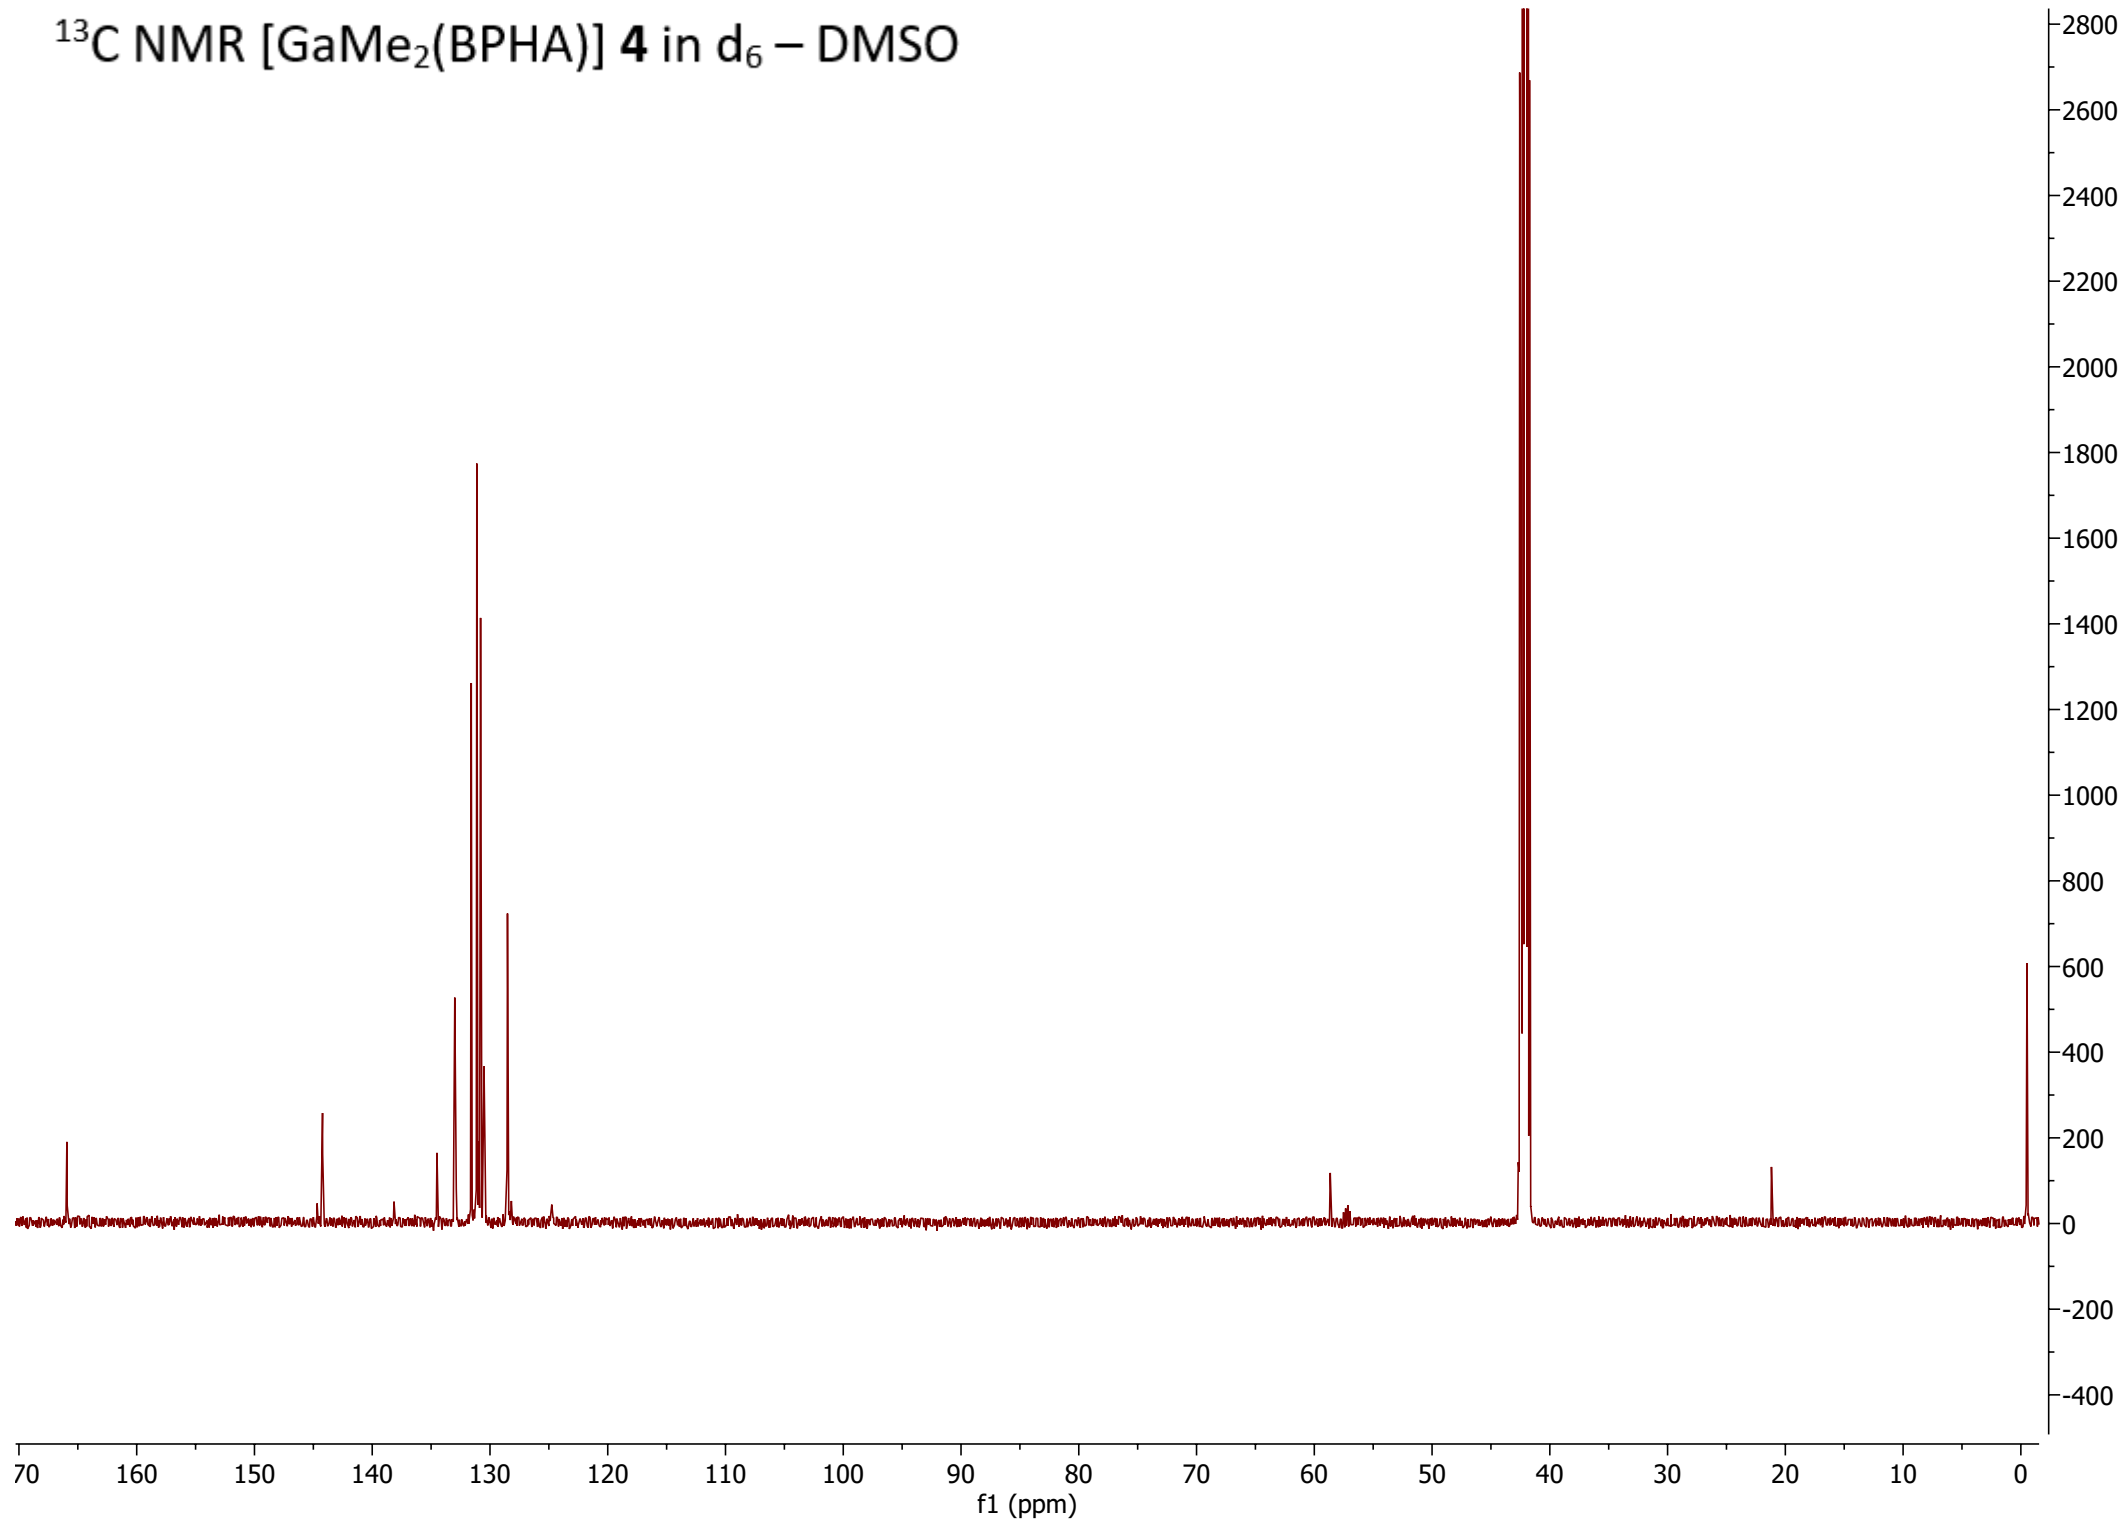

$^1\text{H}$  NMR [GaMe(BHA-*H*)<sub>2</sub>] **5** in d<sub>6</sub> – DMSO

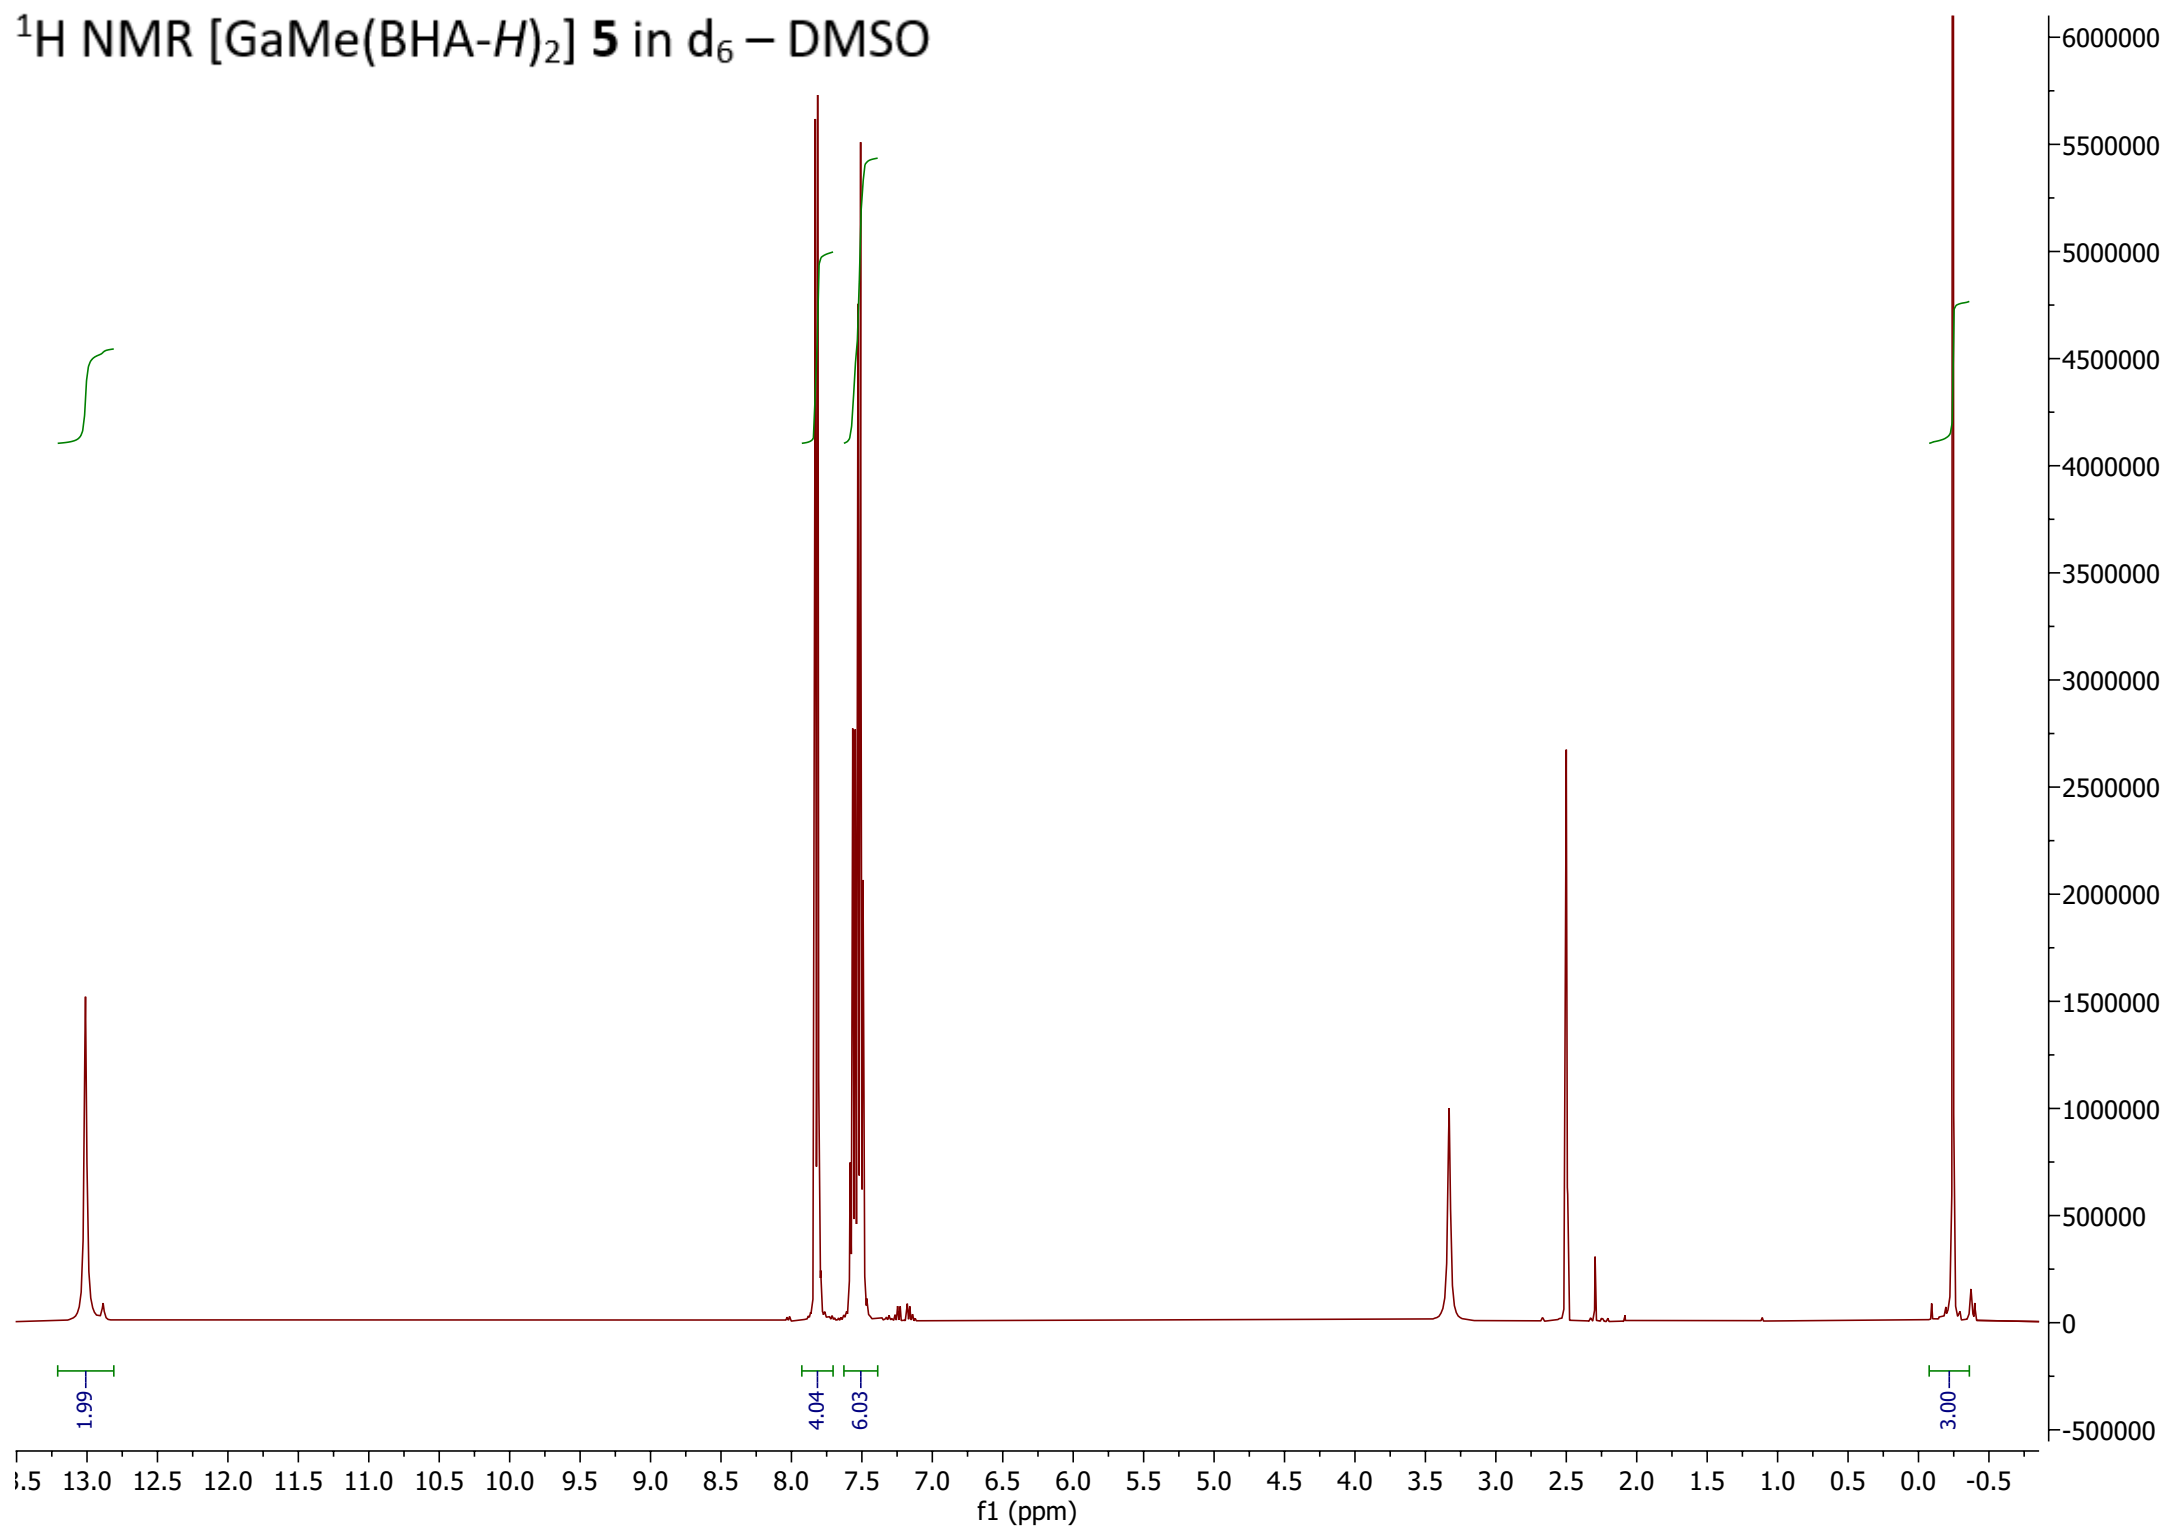

$^{13}\text{C}$  NMR [GaMe(BHA-*H*)<sub>2</sub>] **5** in d<sub>6</sub> – DMSO

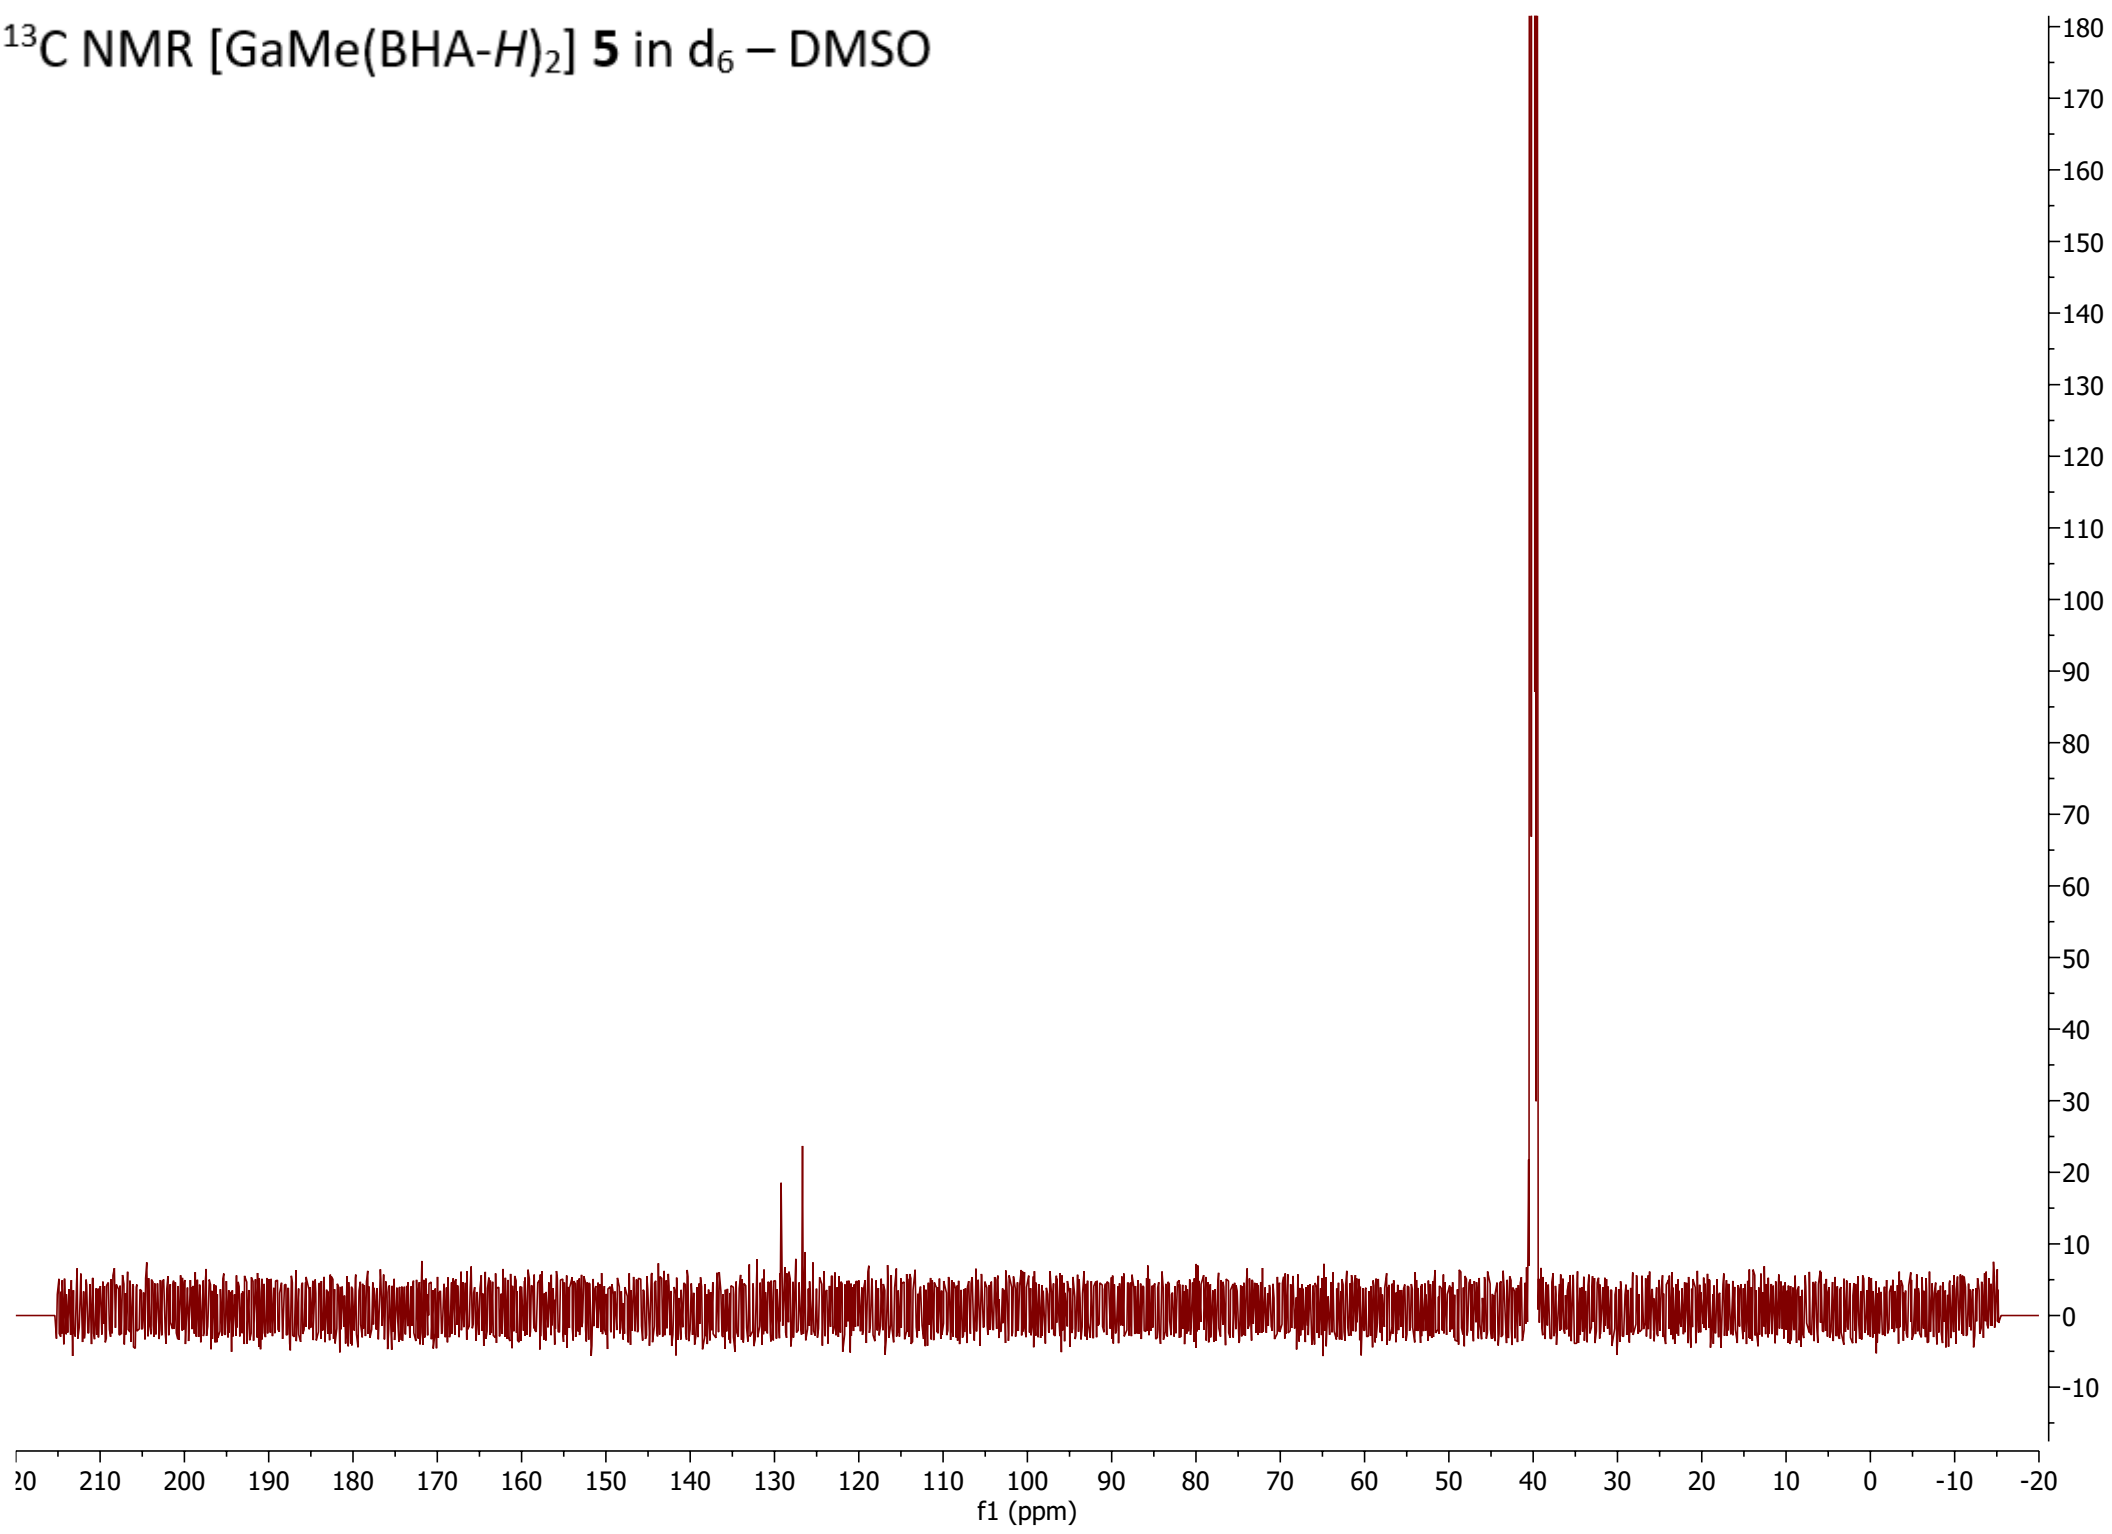

H NMR of [GaMe<sub>2</sub>(OH)] in DMSO-d<sub>6</sub>

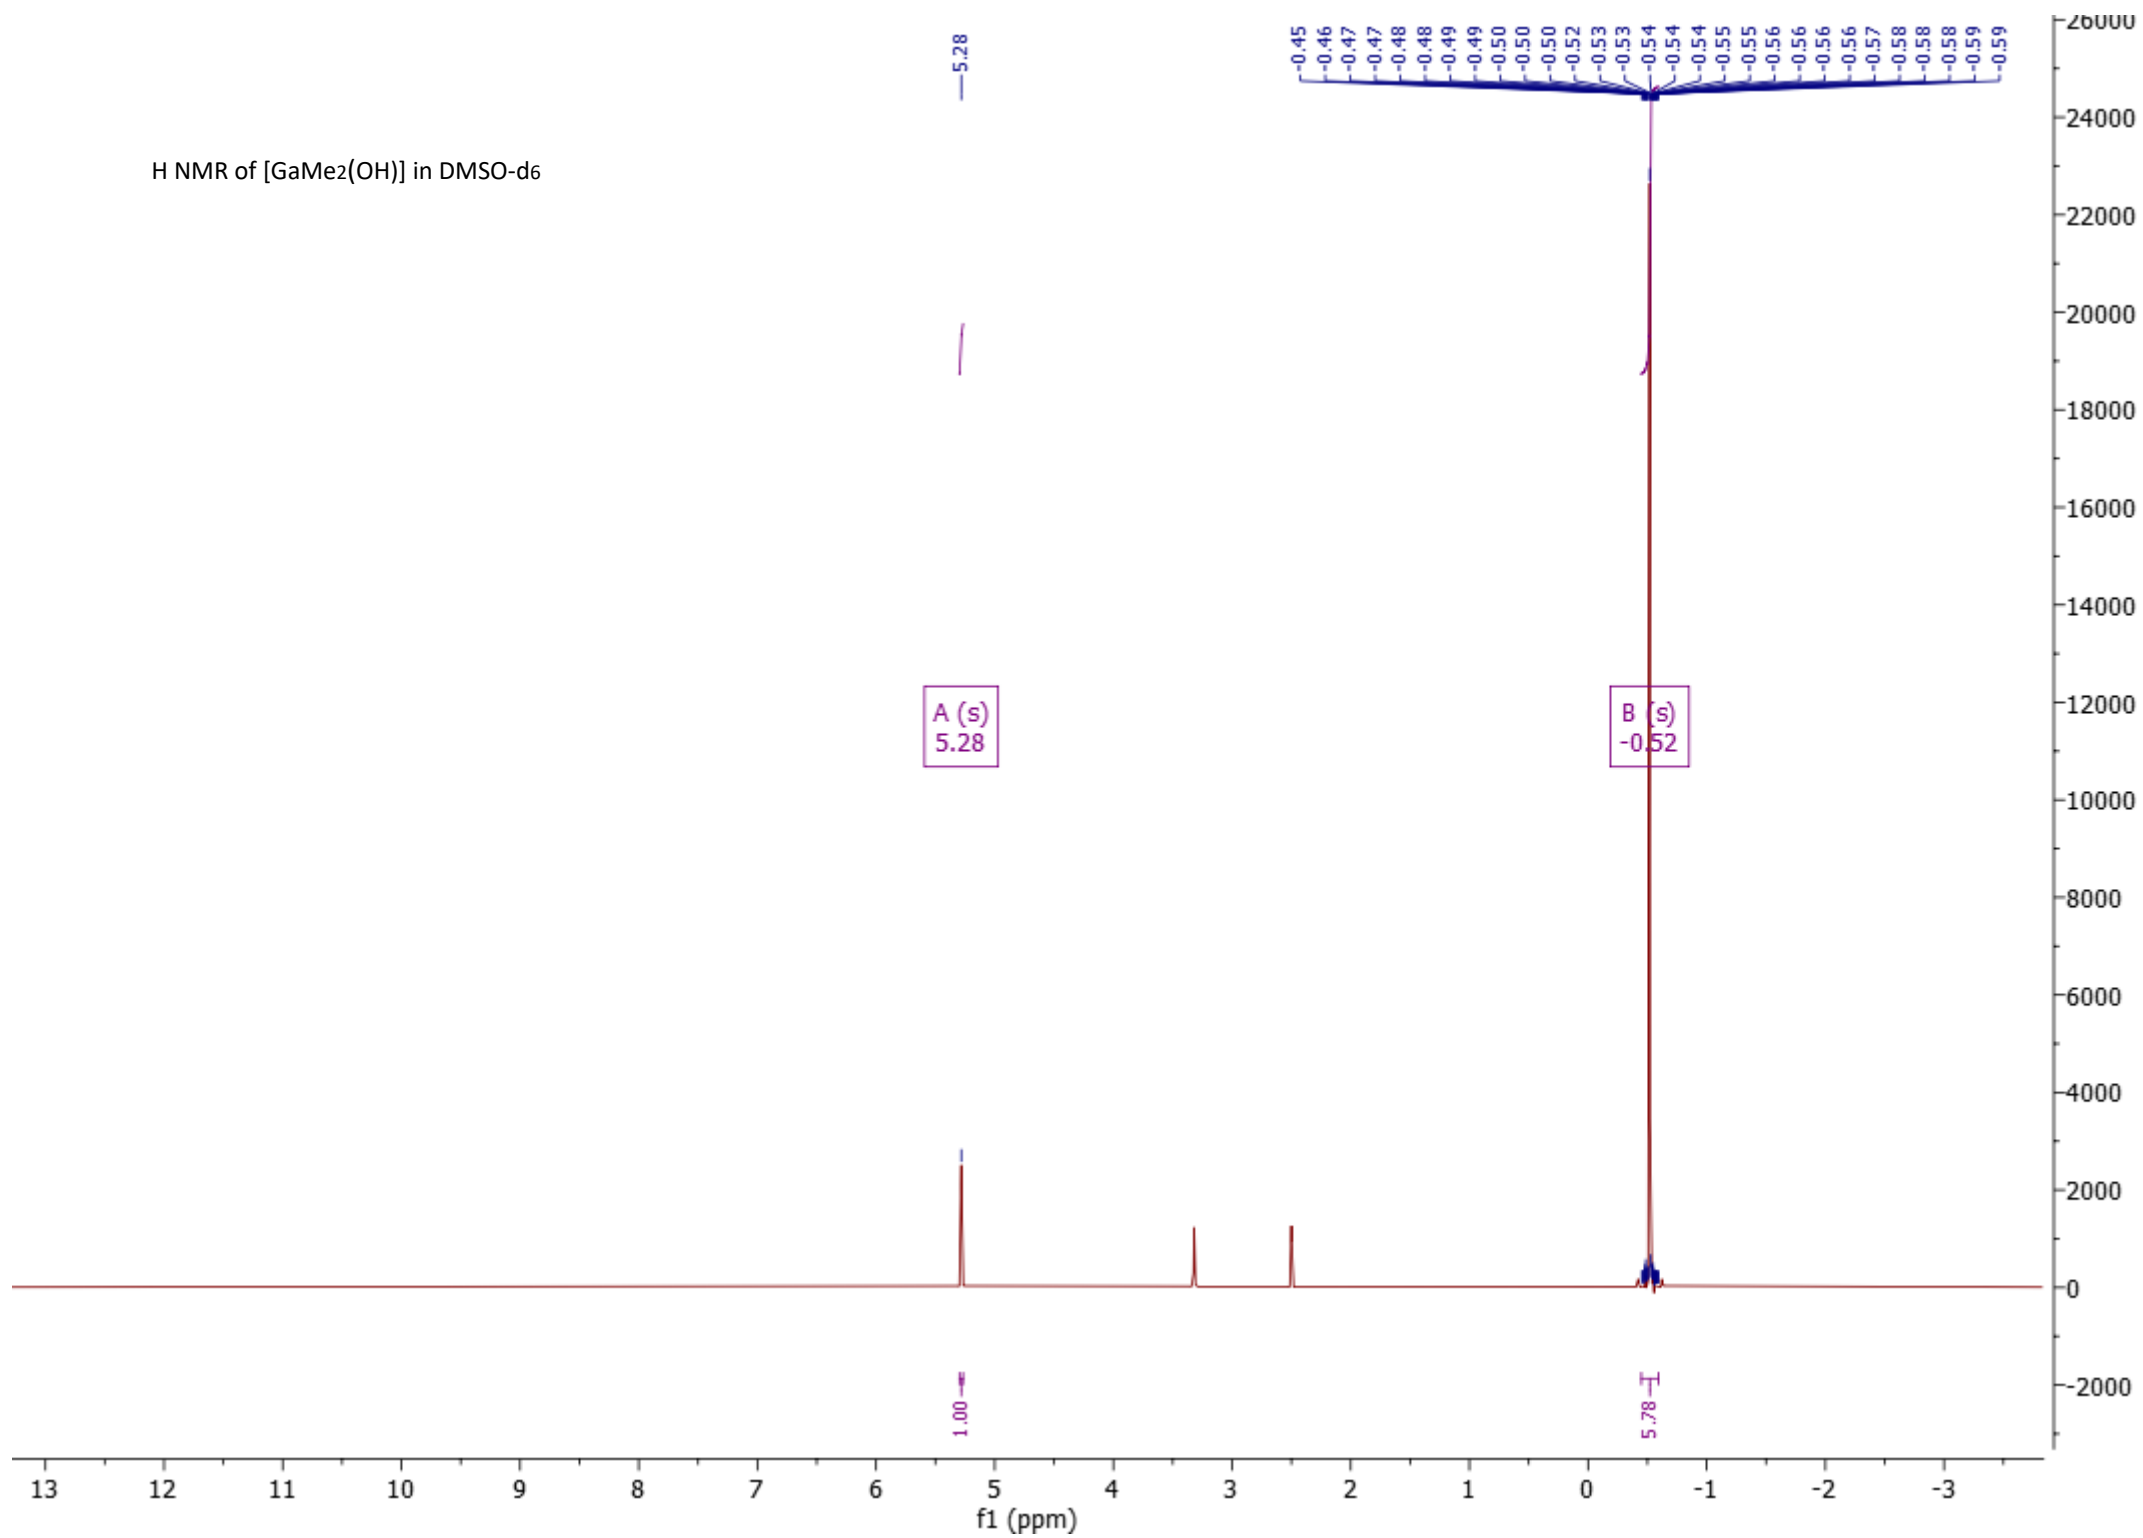

Stacked  $^1\text{H}$  NMR of free BPHAH, complex 1 and complex 4, highlighting shifts in the signals and the absence of the acid proton

BPHAH

$[\text{Ga}(\text{BPHA})_3]$

$[\text{GaMe}(\text{BPHA})_2]$

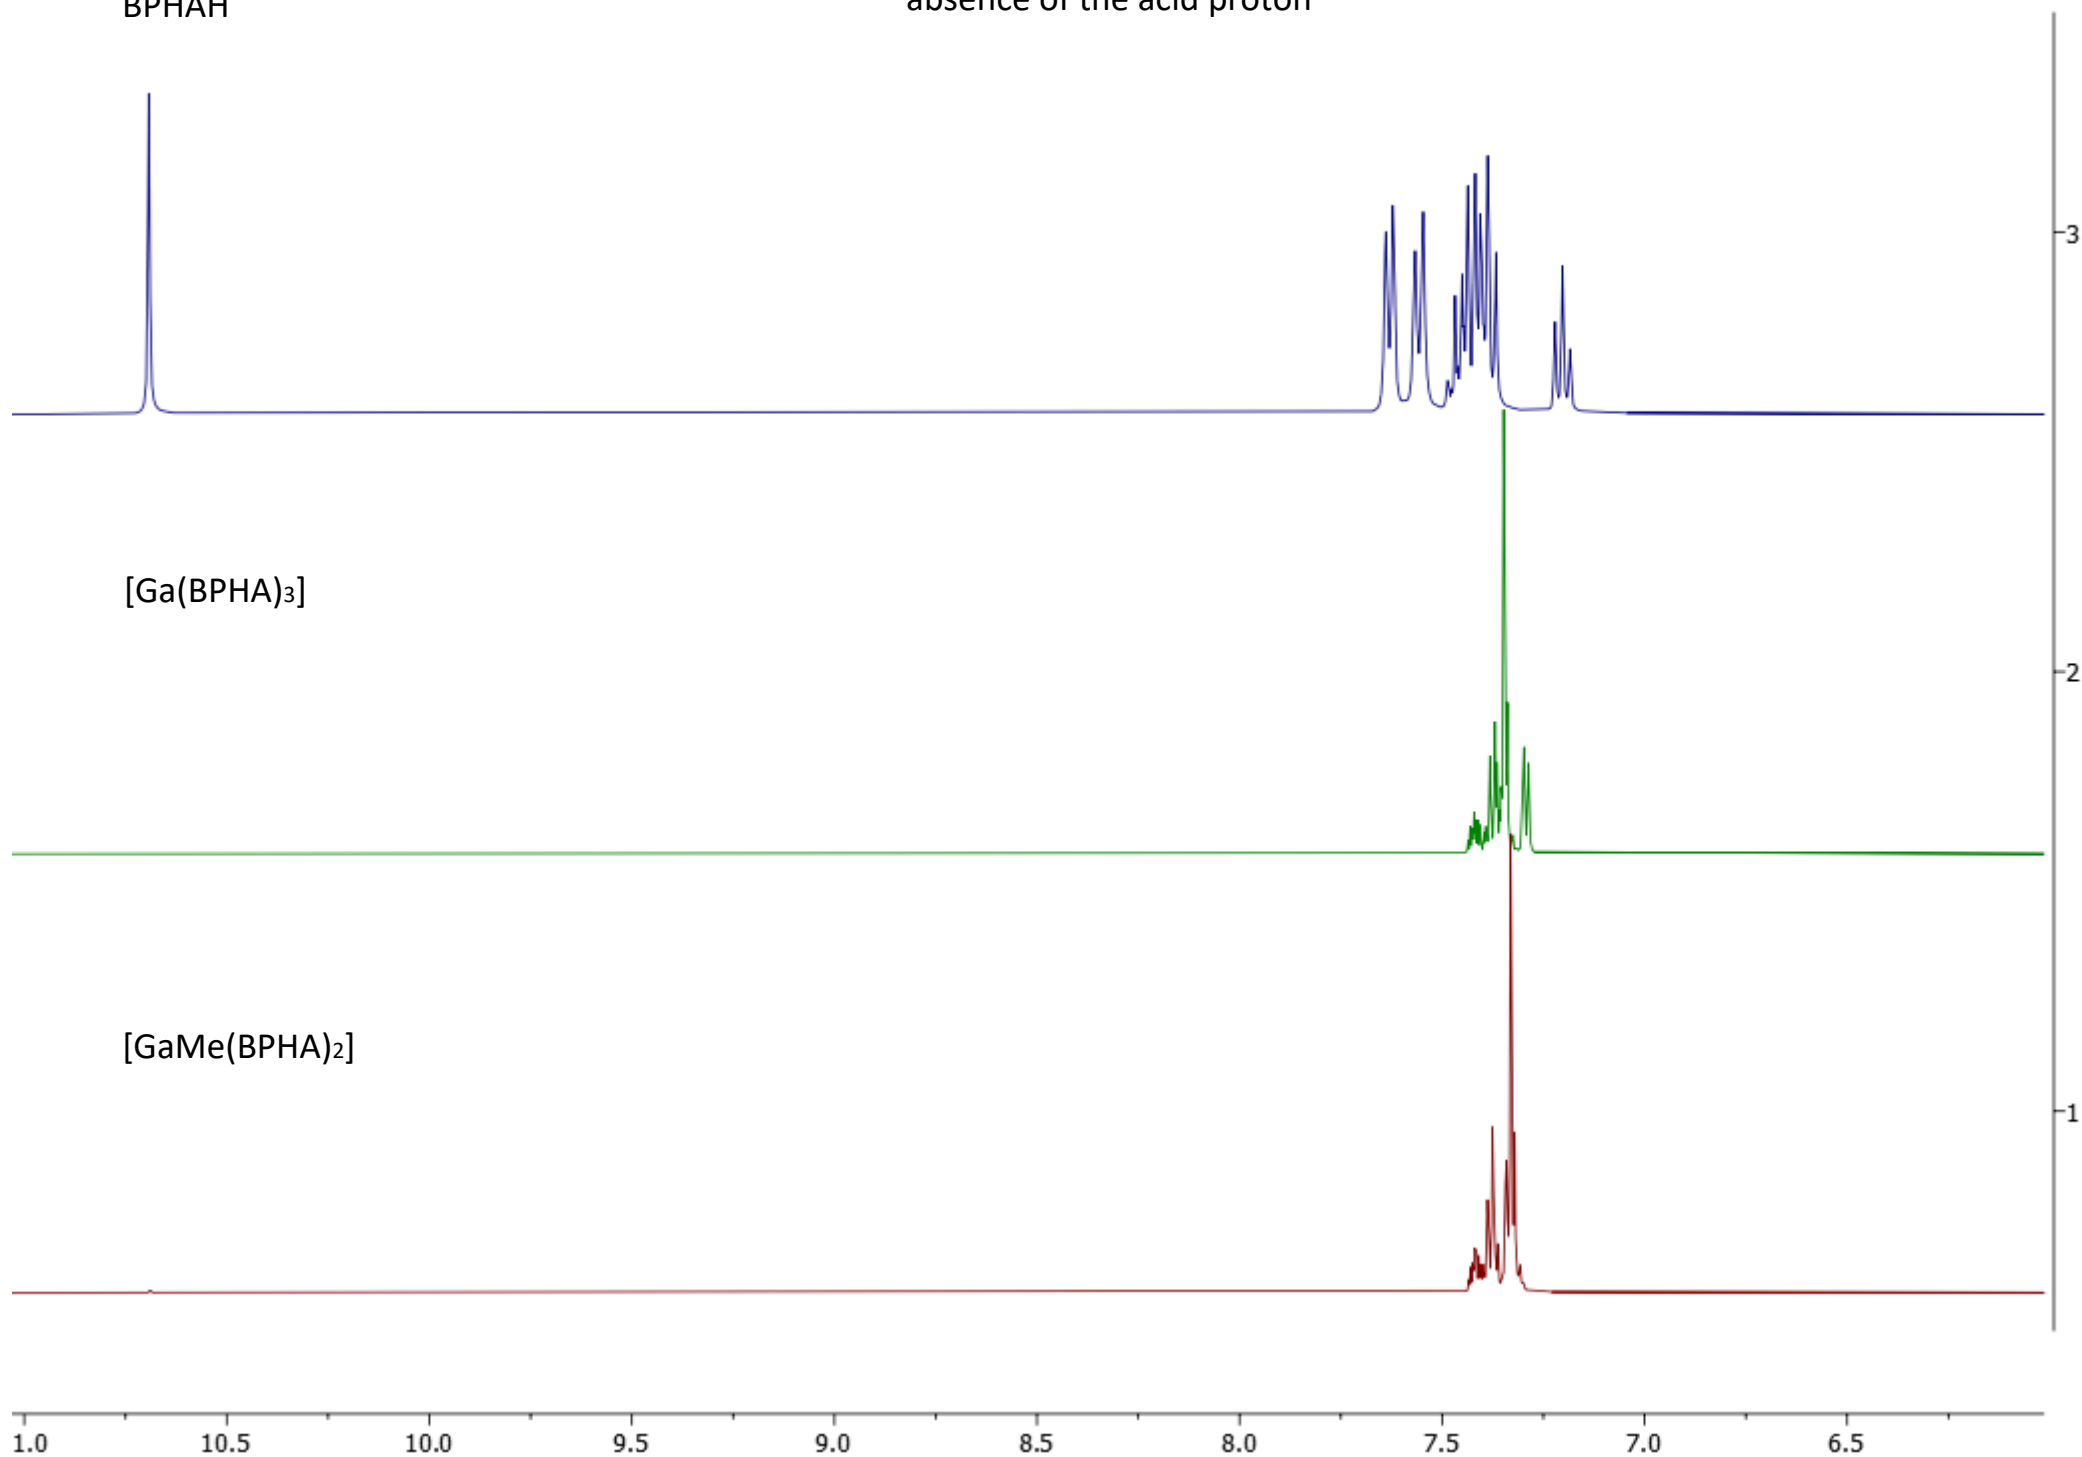

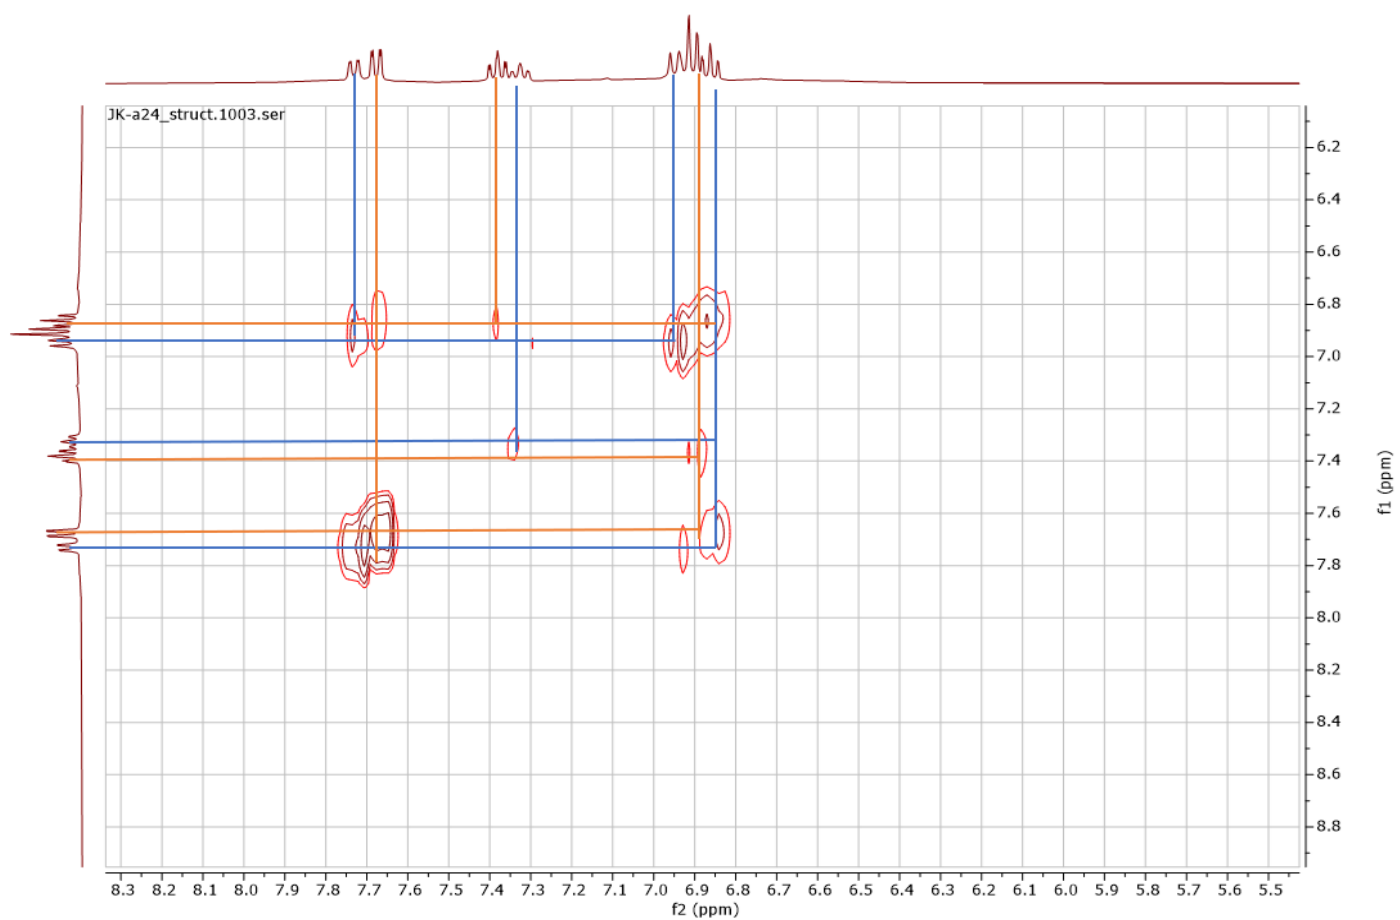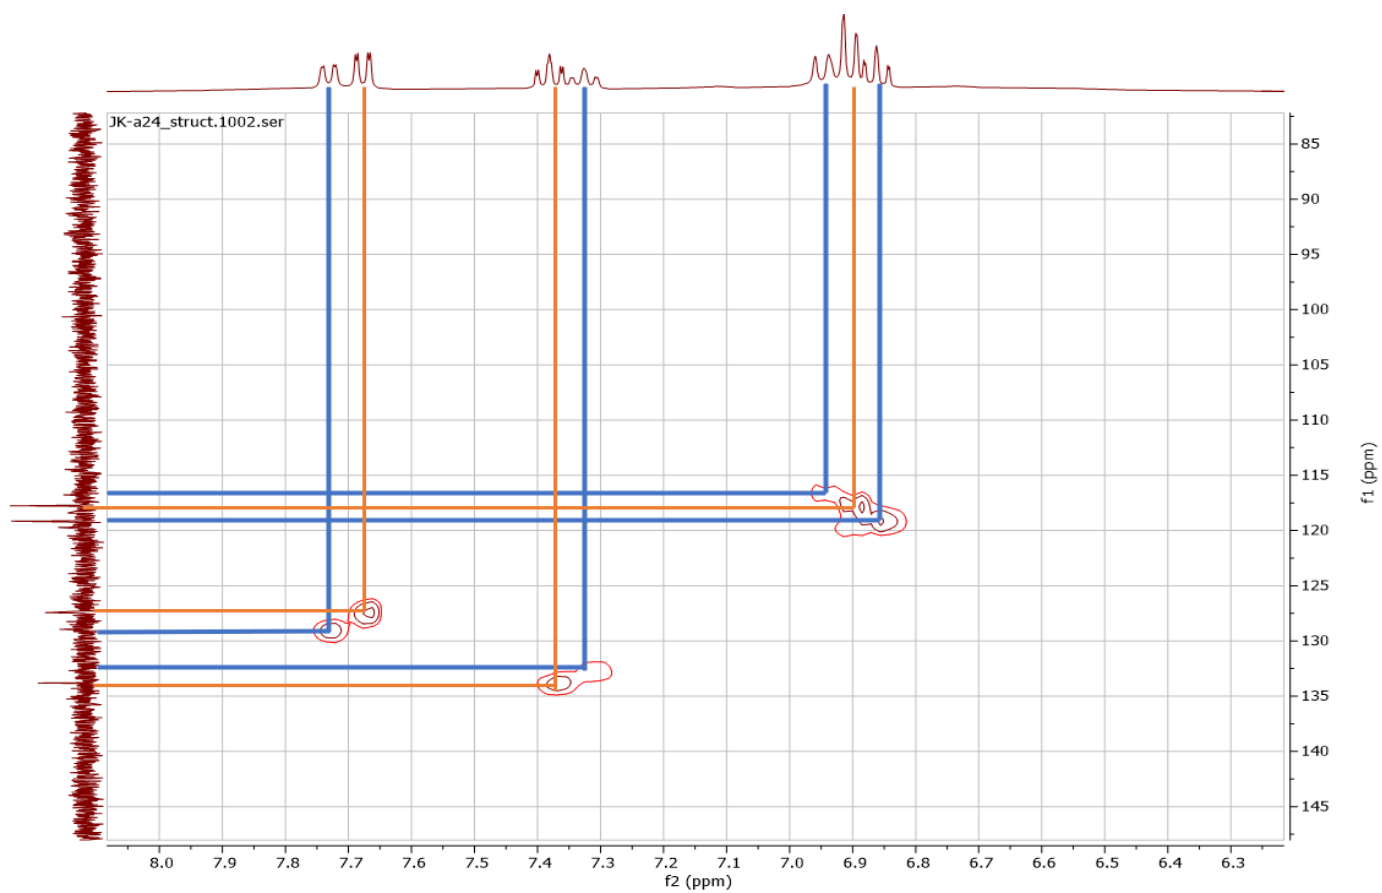

2-D proton-proton and proton-carbon correlation spectra for complex 3 in the solution state.

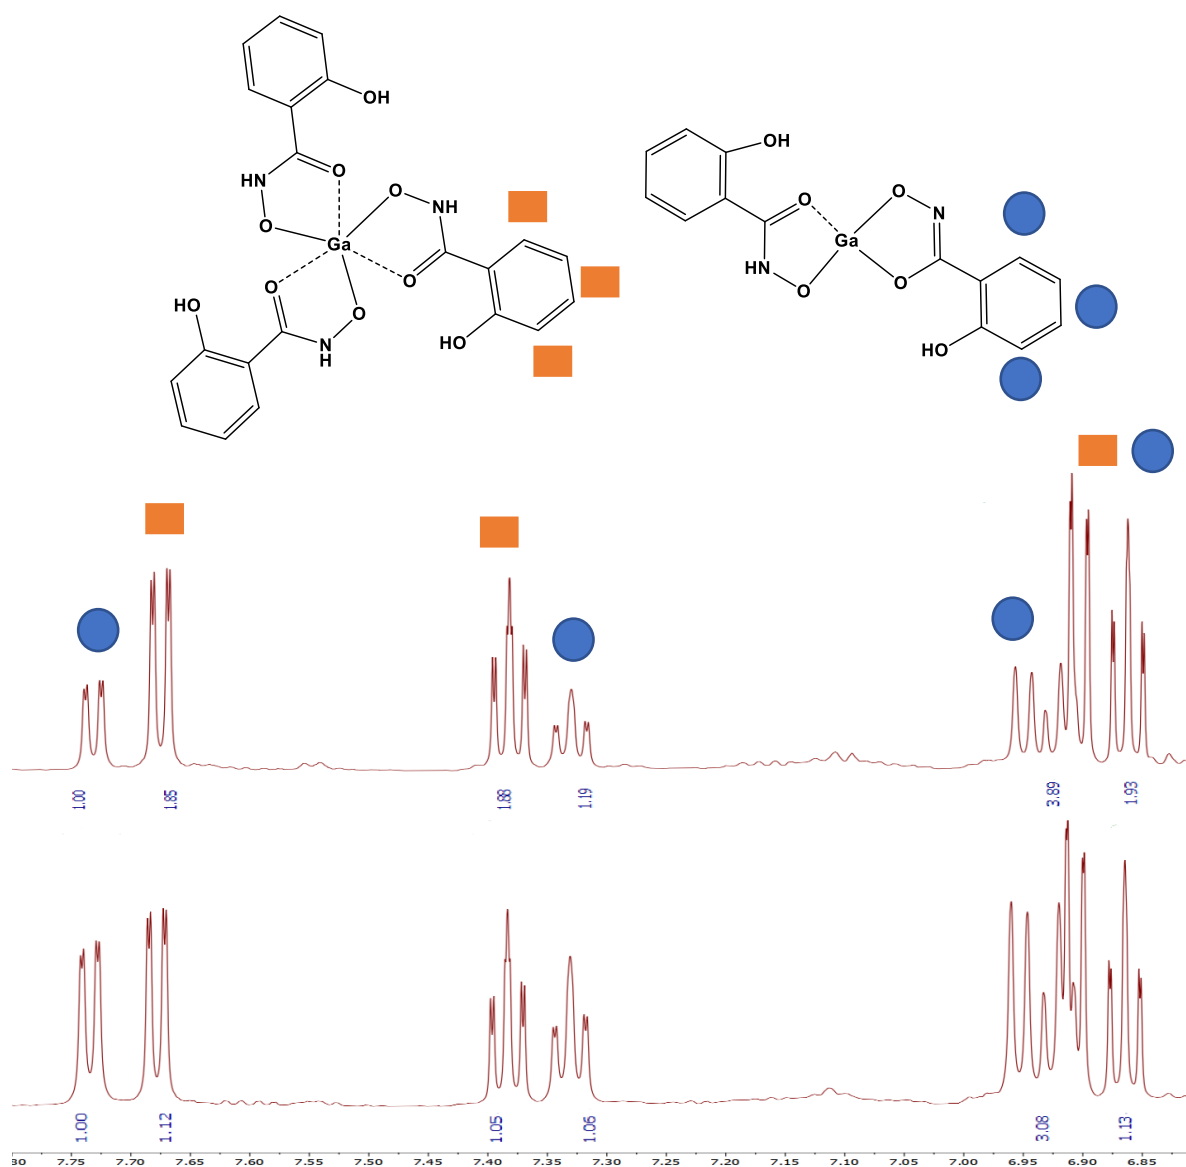

Figure S1.  $^1\text{H}$  NMR stack of two individual spectra of complex **3**, highlighting the changes in the aromatic region in regards to the changes in the enol-keto ratio.

## 2. FT-IR Spectra of Metal Complexes 1 - 6

### 1, [Ga(BPHA)<sub>3</sub>]

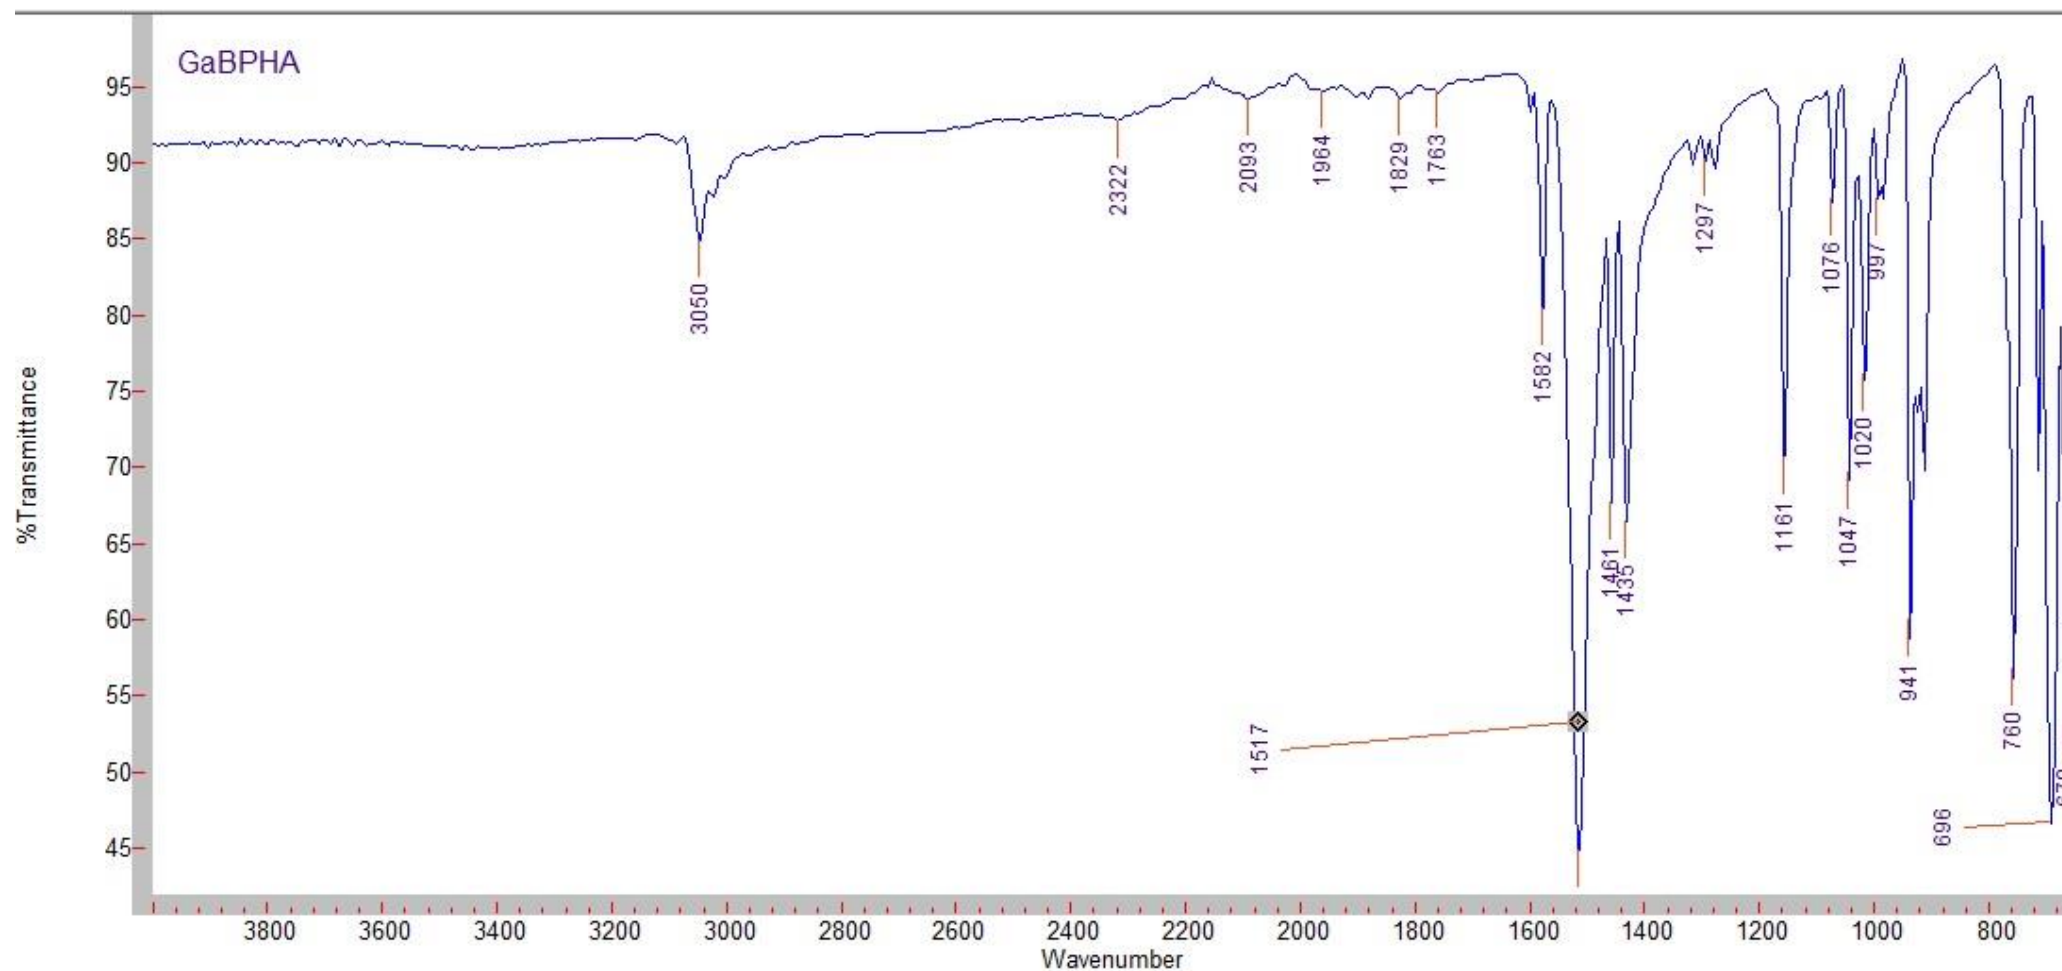

2, [Ga(BHA)<sub>3</sub>]

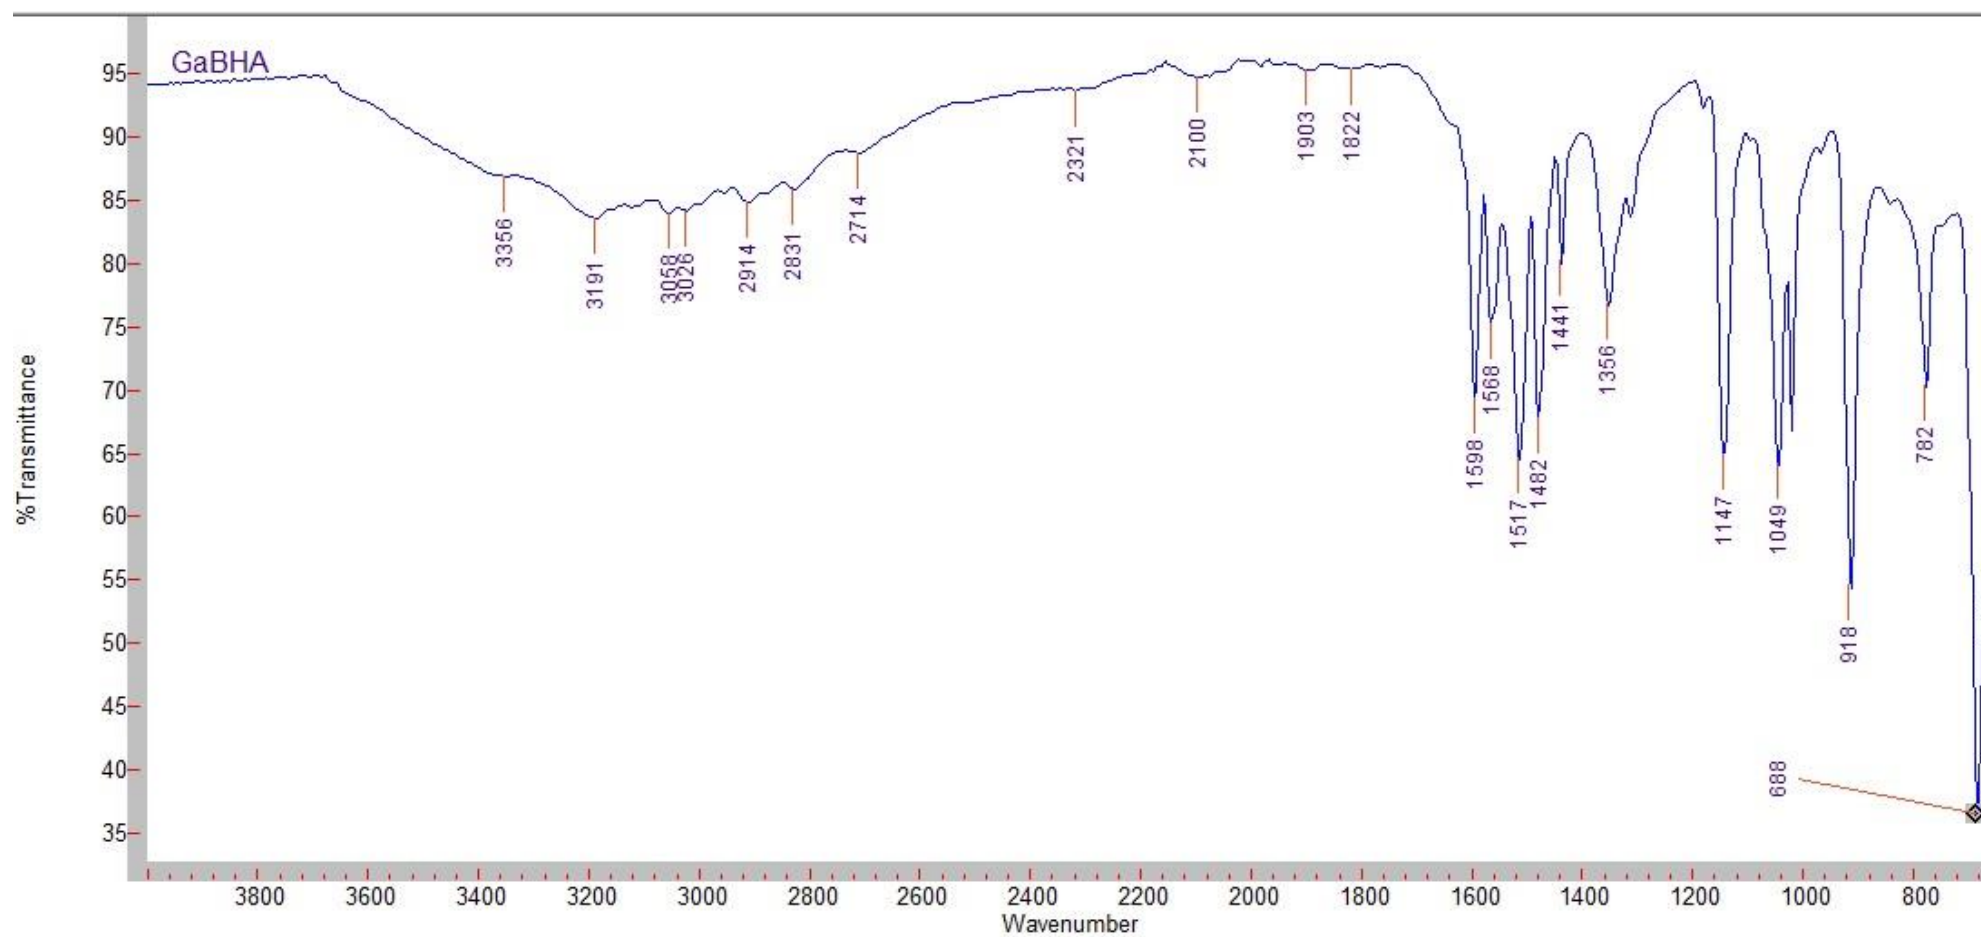

### 3, [Ga(SHA-H<sub>2</sub>)(SHA-H)]

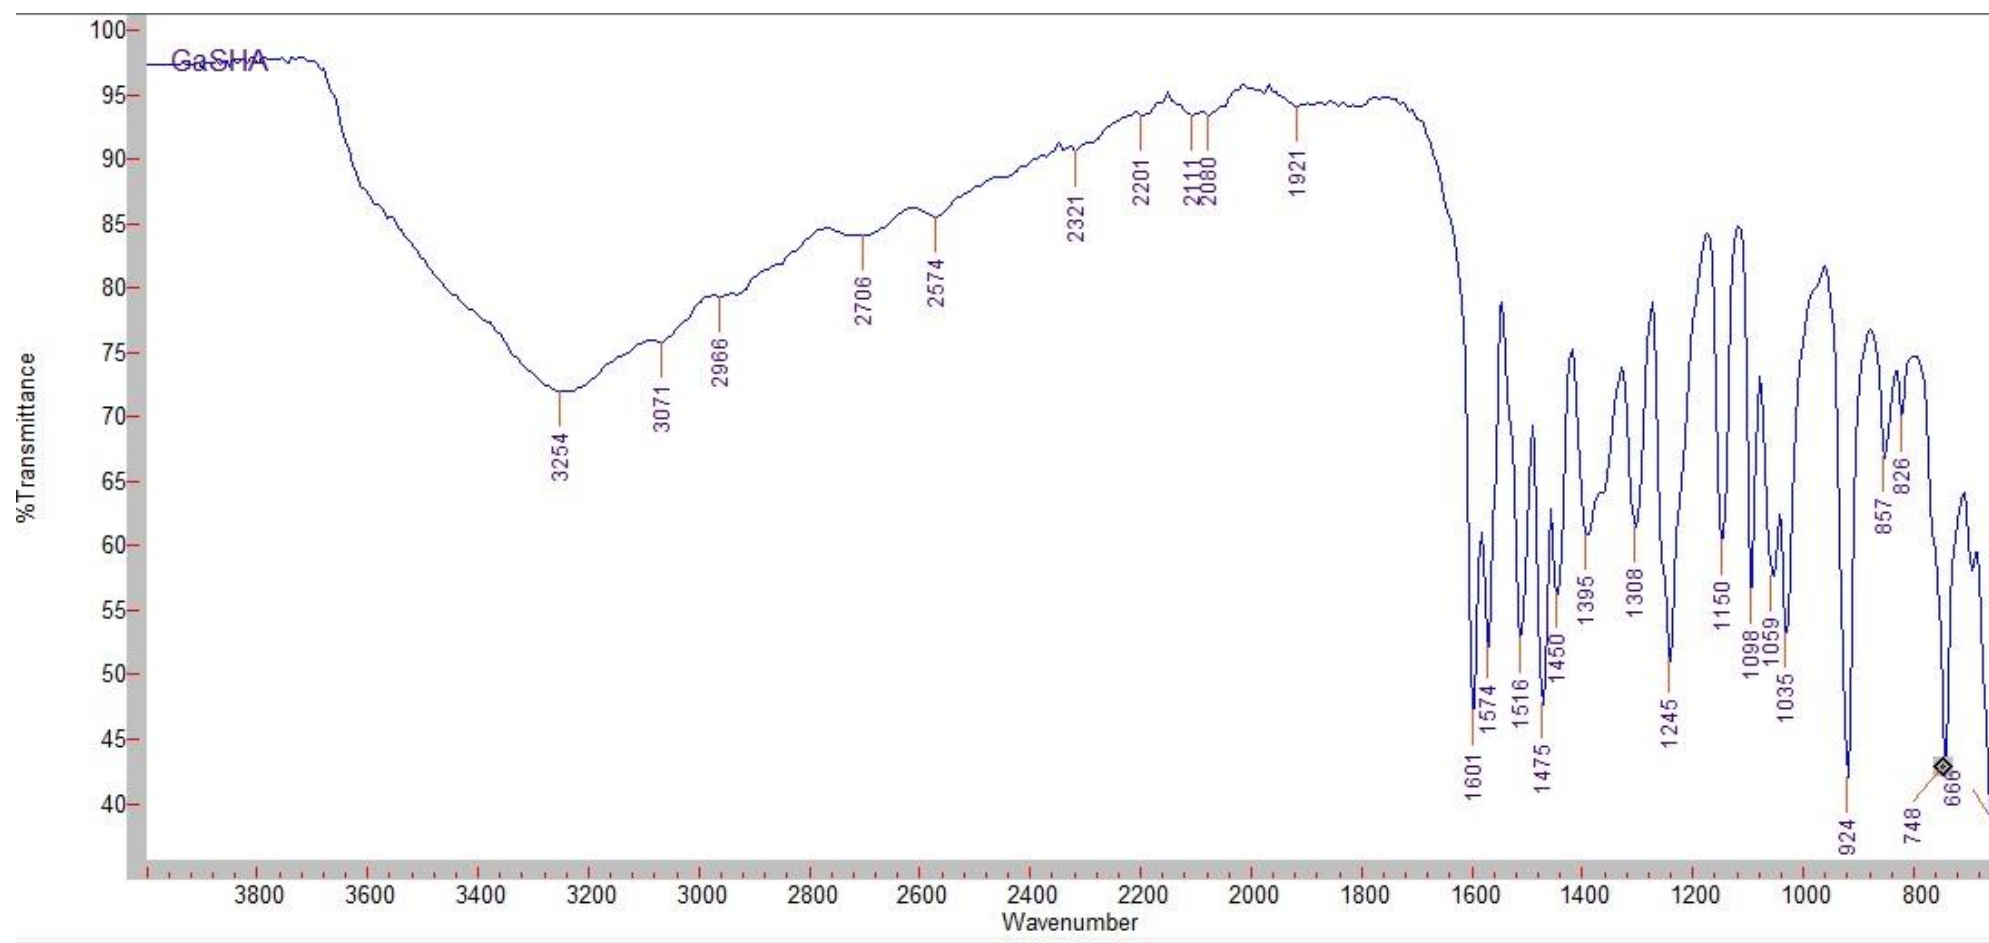

**4, [GaMe<sub>2</sub>(BPHA)]**

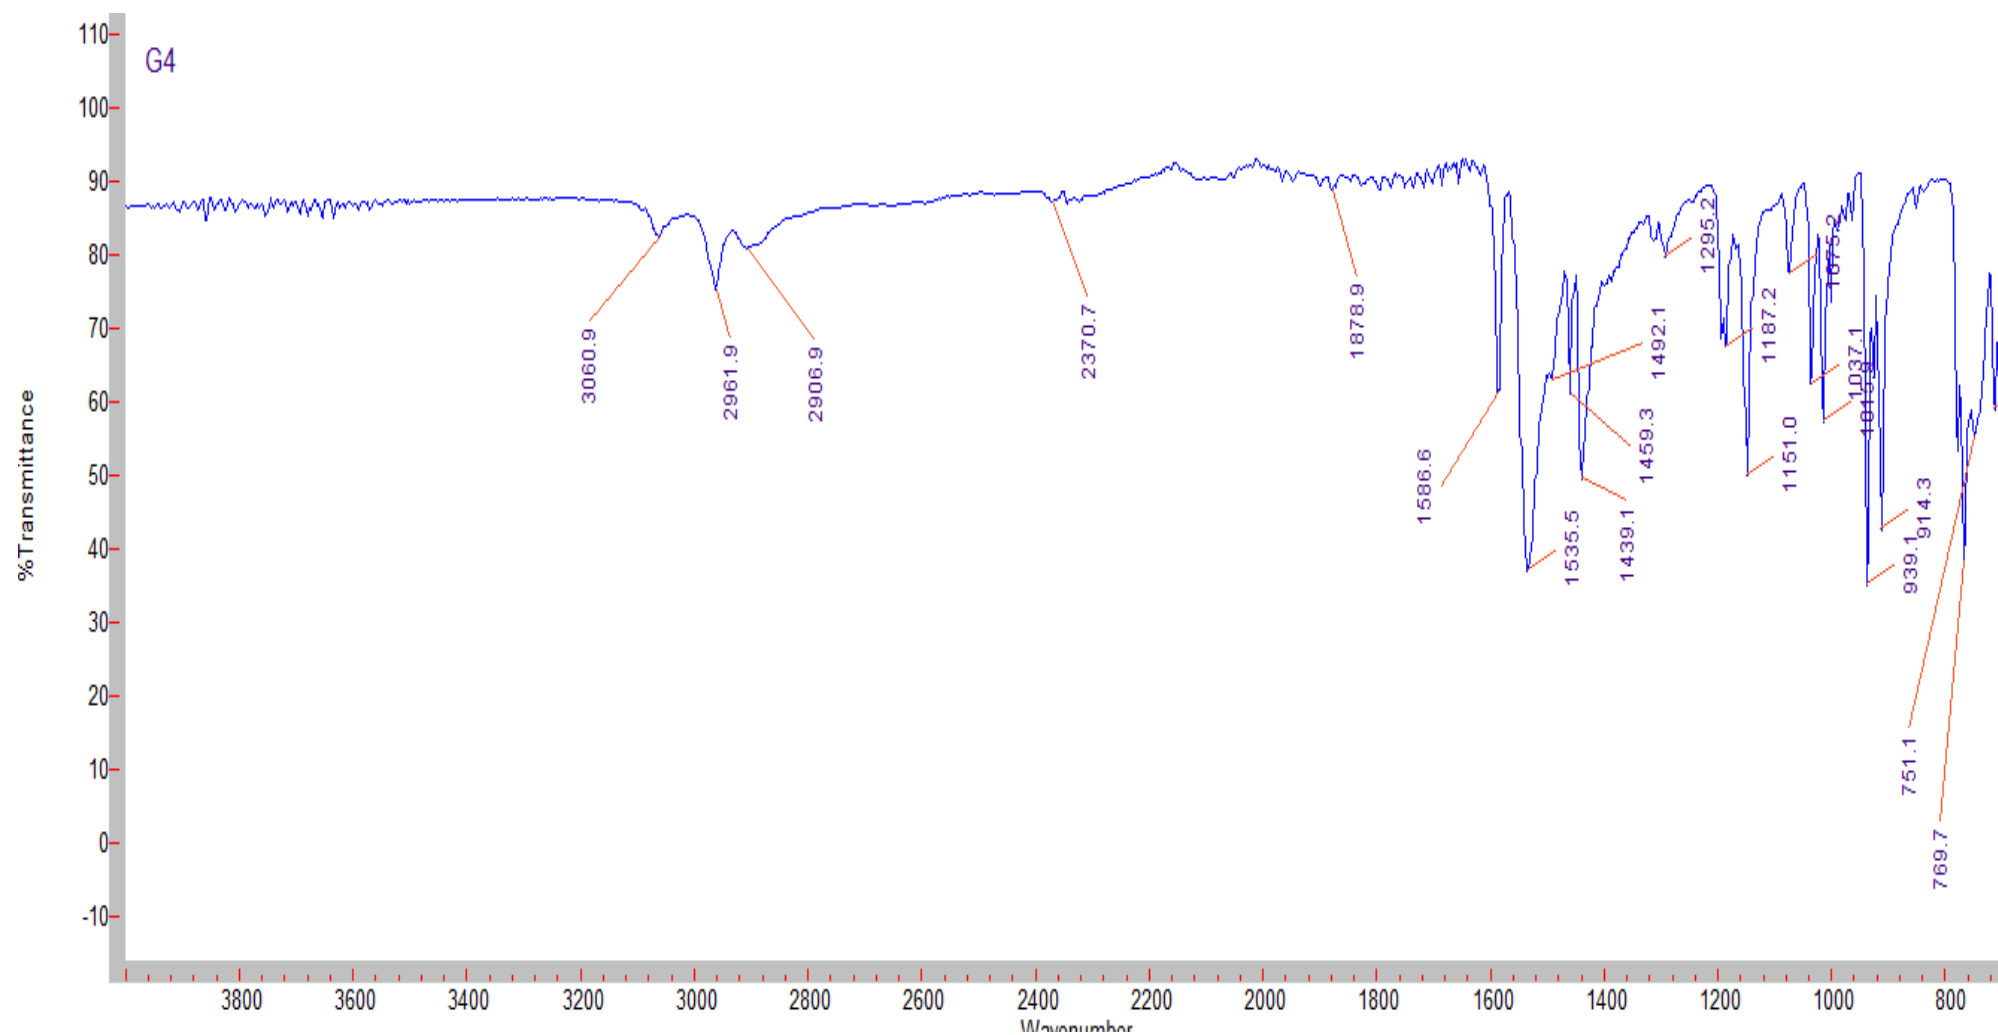

5, [GaMe(BHA)<sub>2</sub>]

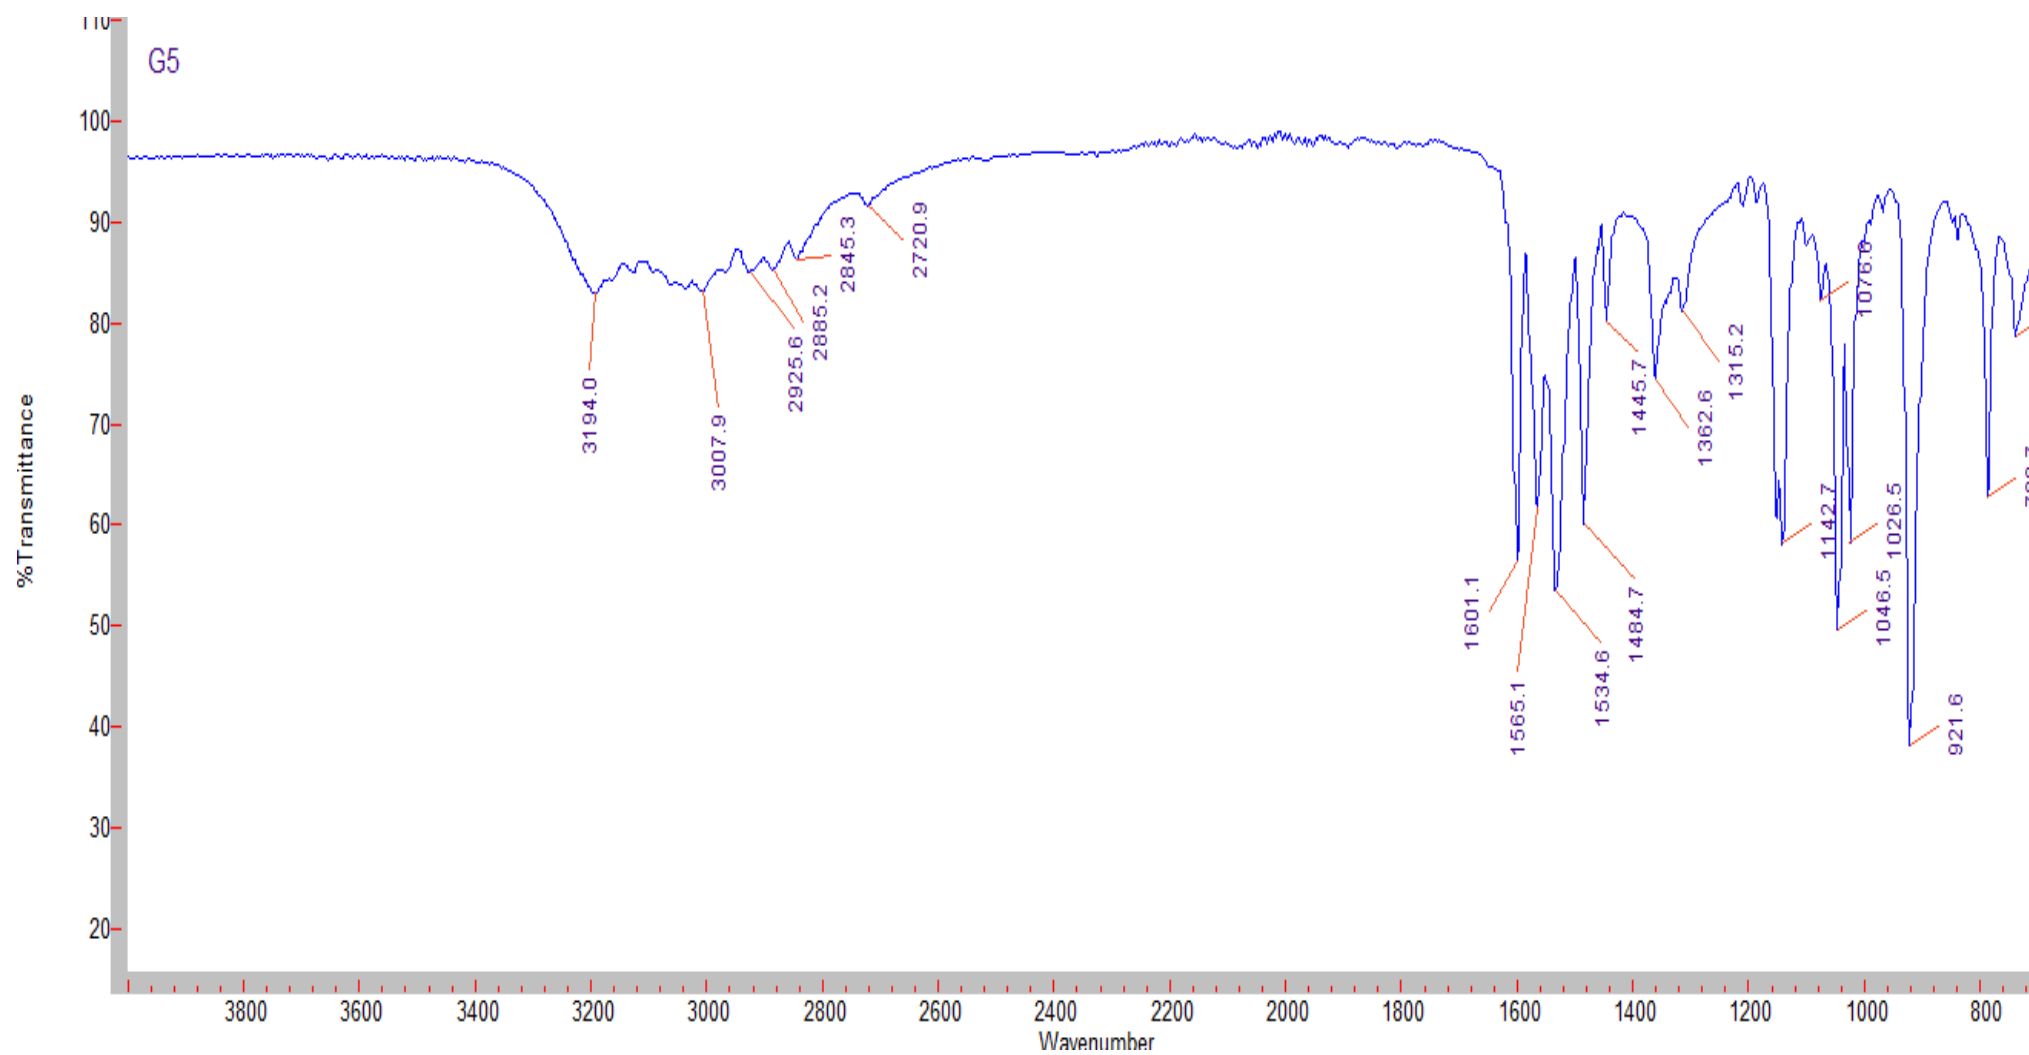

**6, [Fe(BPHA)<sub>3</sub>]**

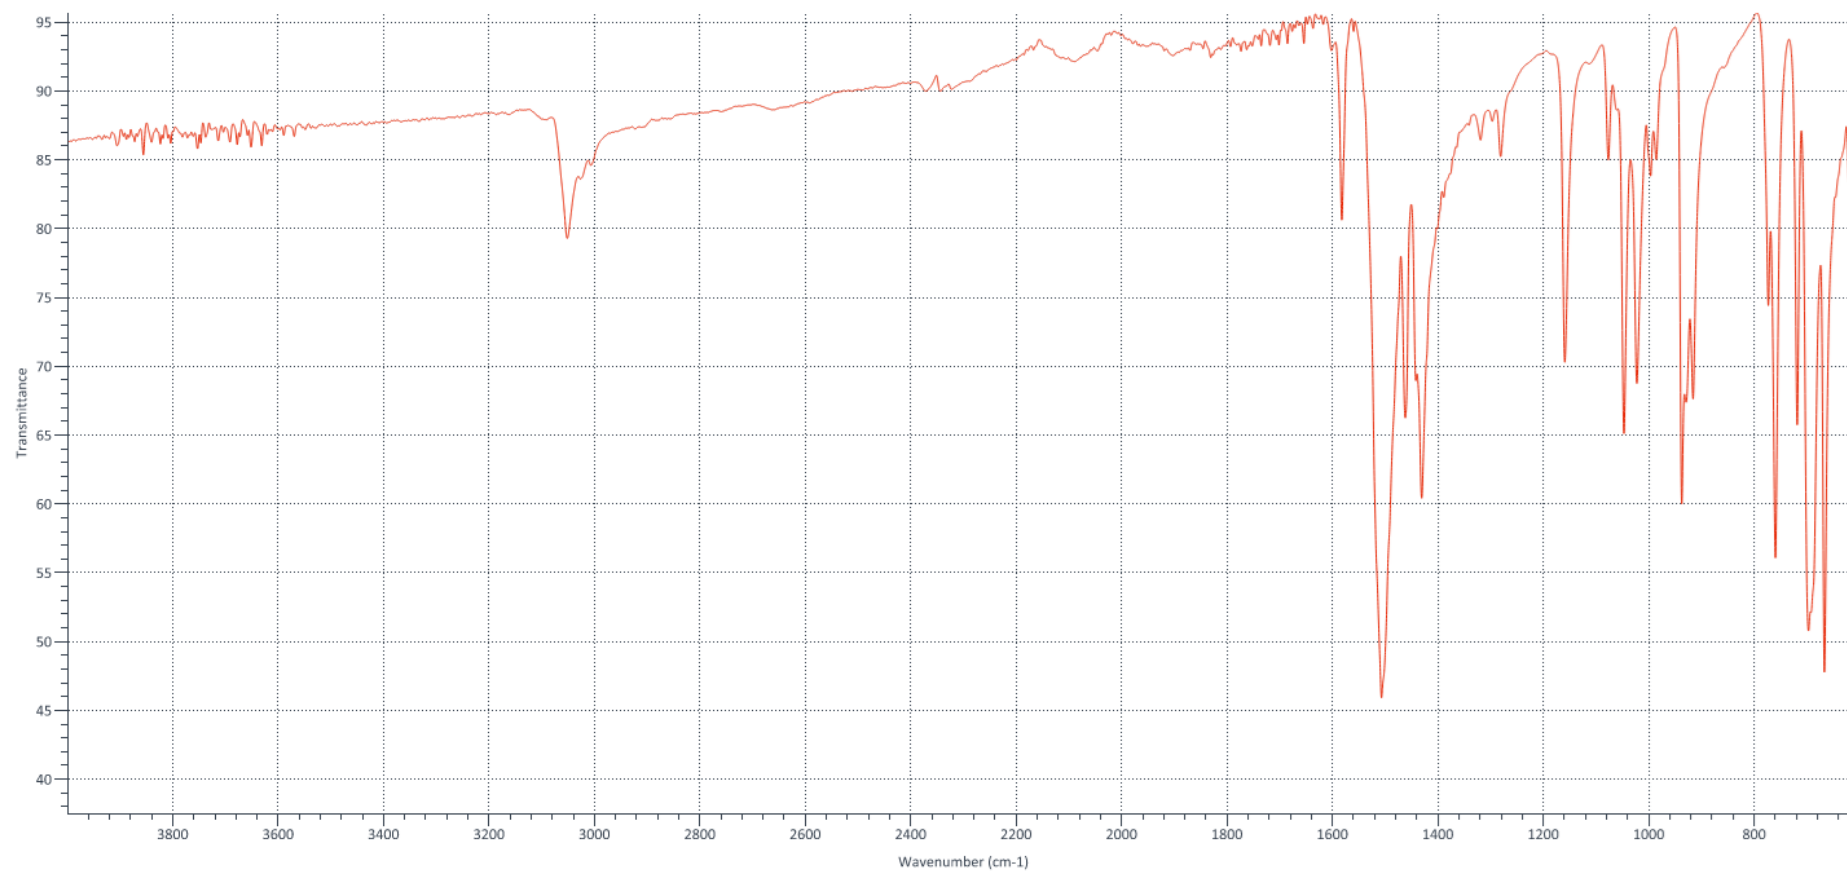

### 3. High-Res Mass Spectrometry of Metal complexes 1 - 6

#### 1, [Ga(BPHA)<sub>3</sub>]

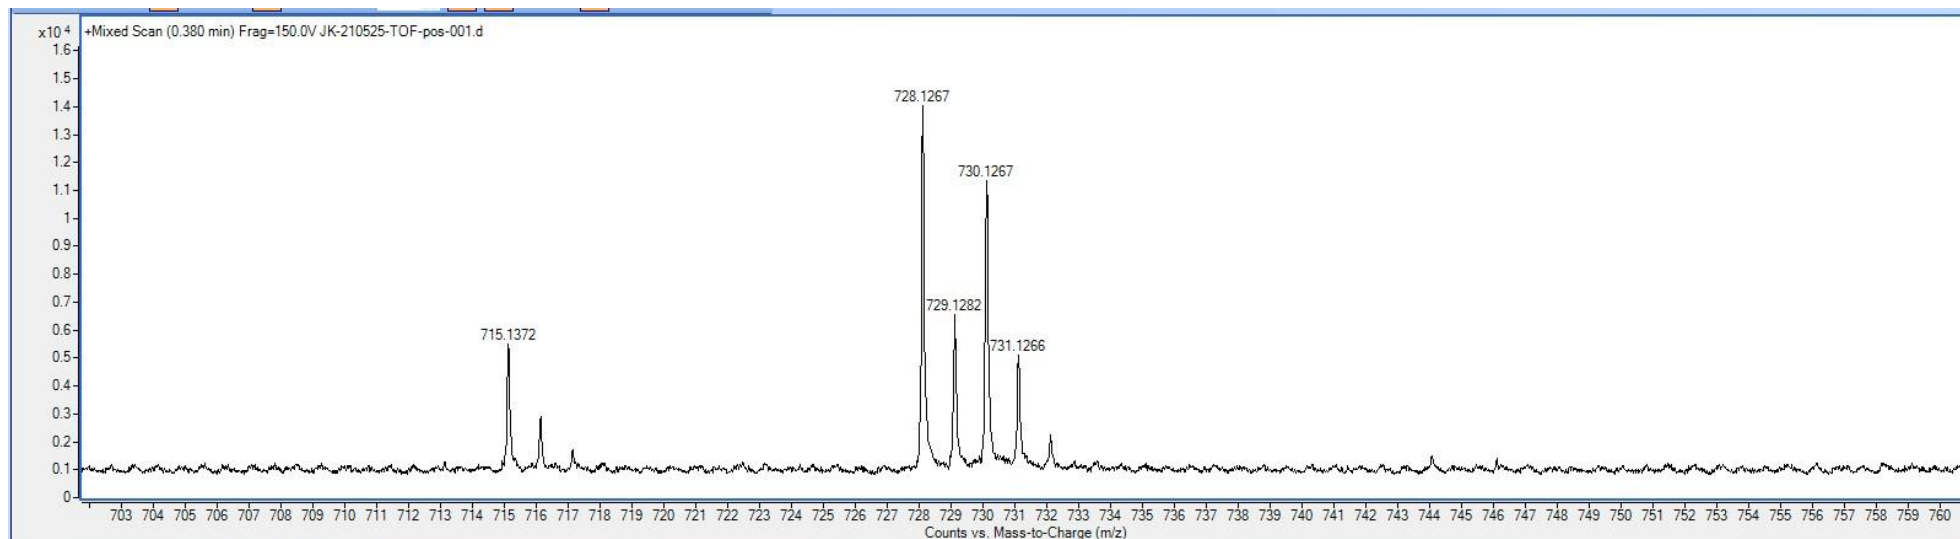

#### 2, [Ga(BHA)<sub>3</sub>]

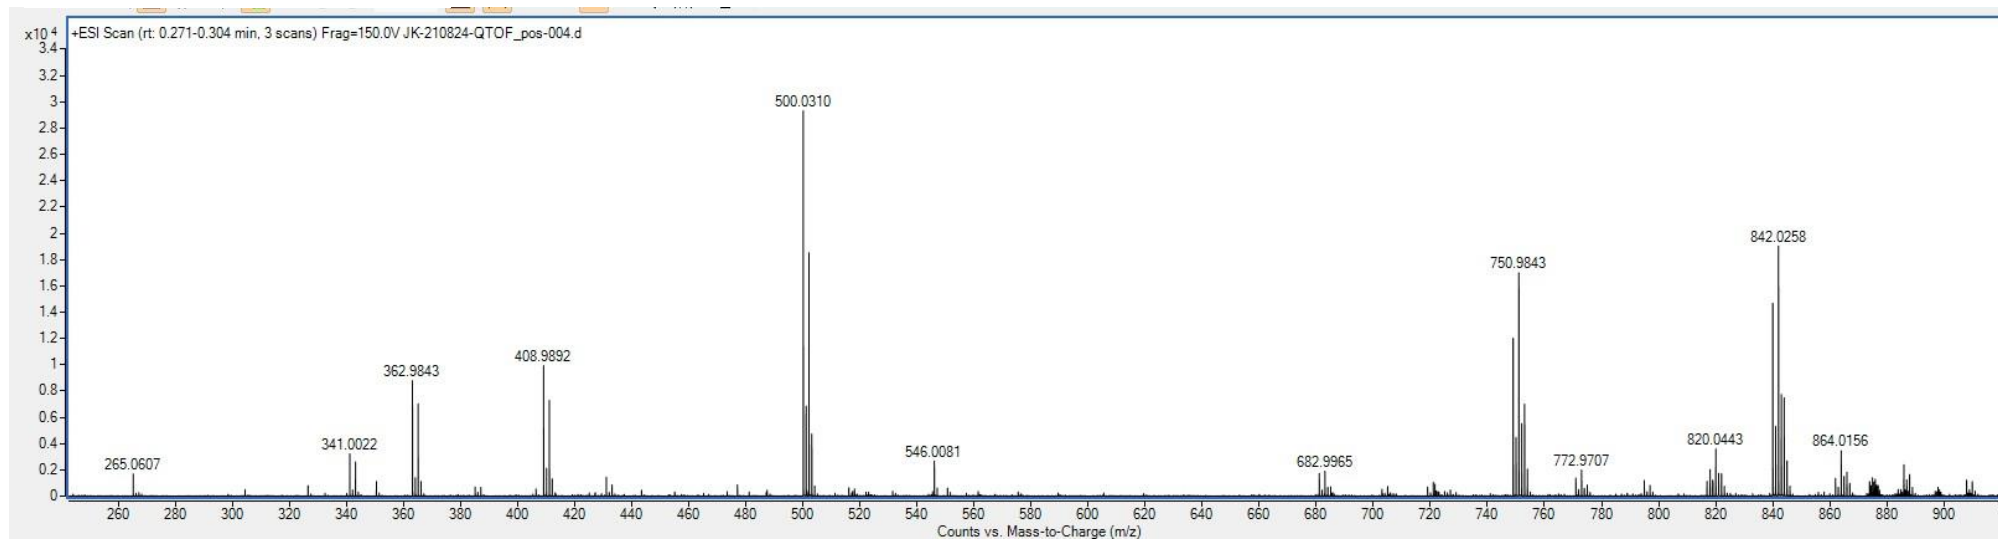

### 3, [Ga(SHA-H<sub>2</sub>)(SHA-H)]

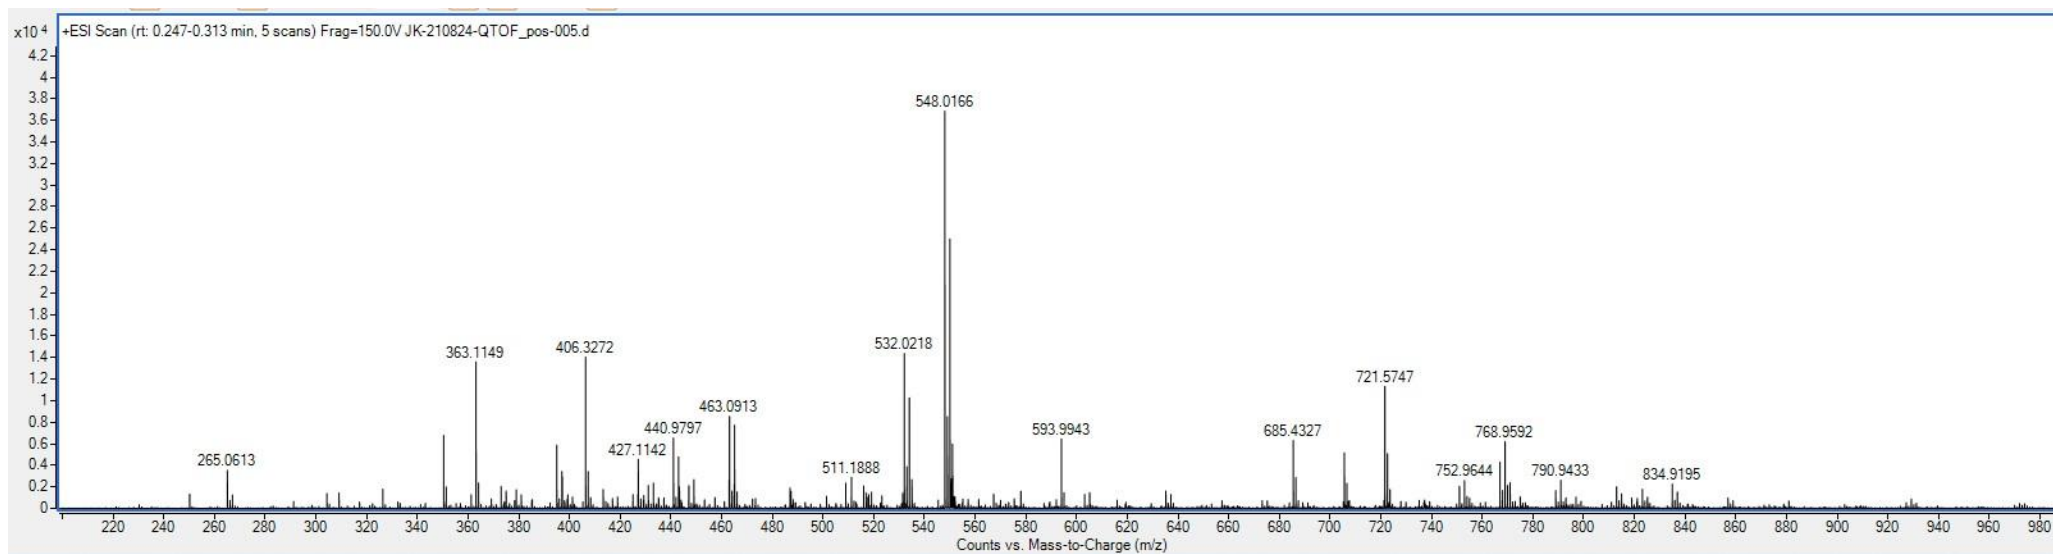

### 4, [GaMe<sub>2</sub>(BPHA)]

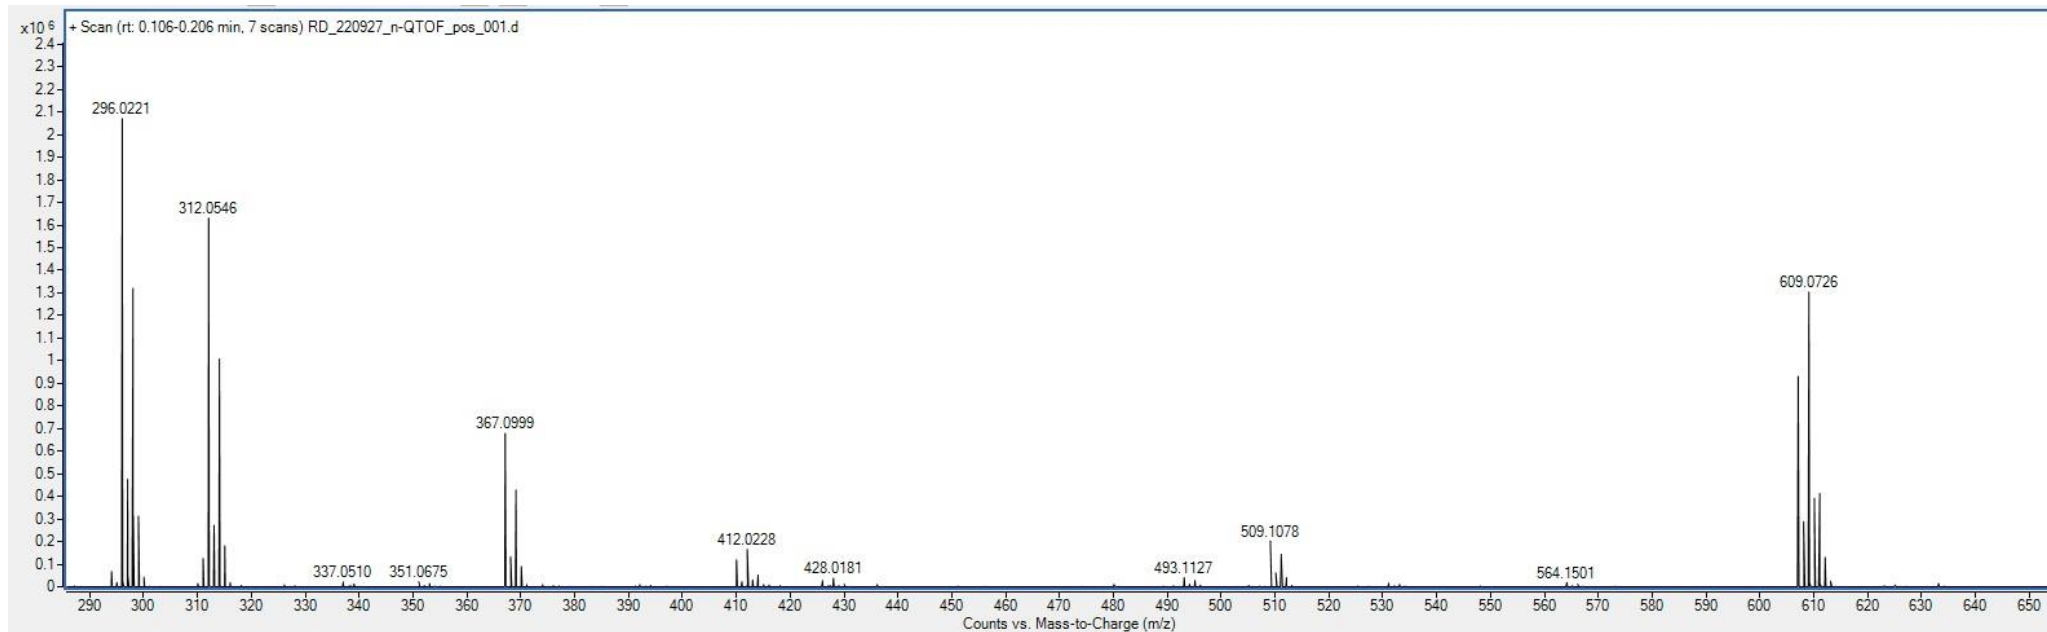

## 5, [GaMe(BHA)<sub>2</sub>]

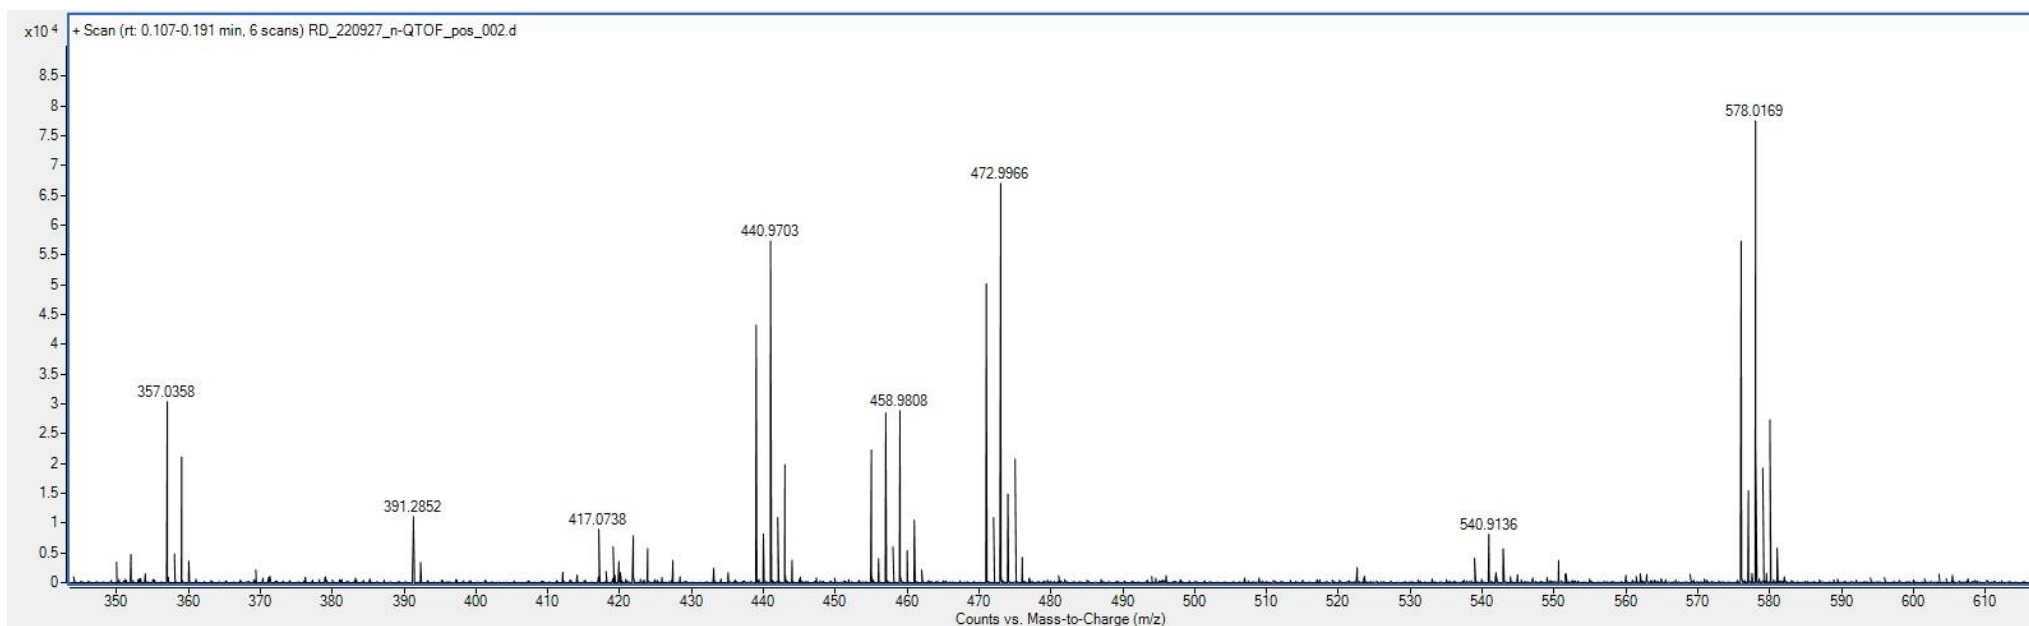

## 6, [Fe(BPHA)<sub>3</sub>]

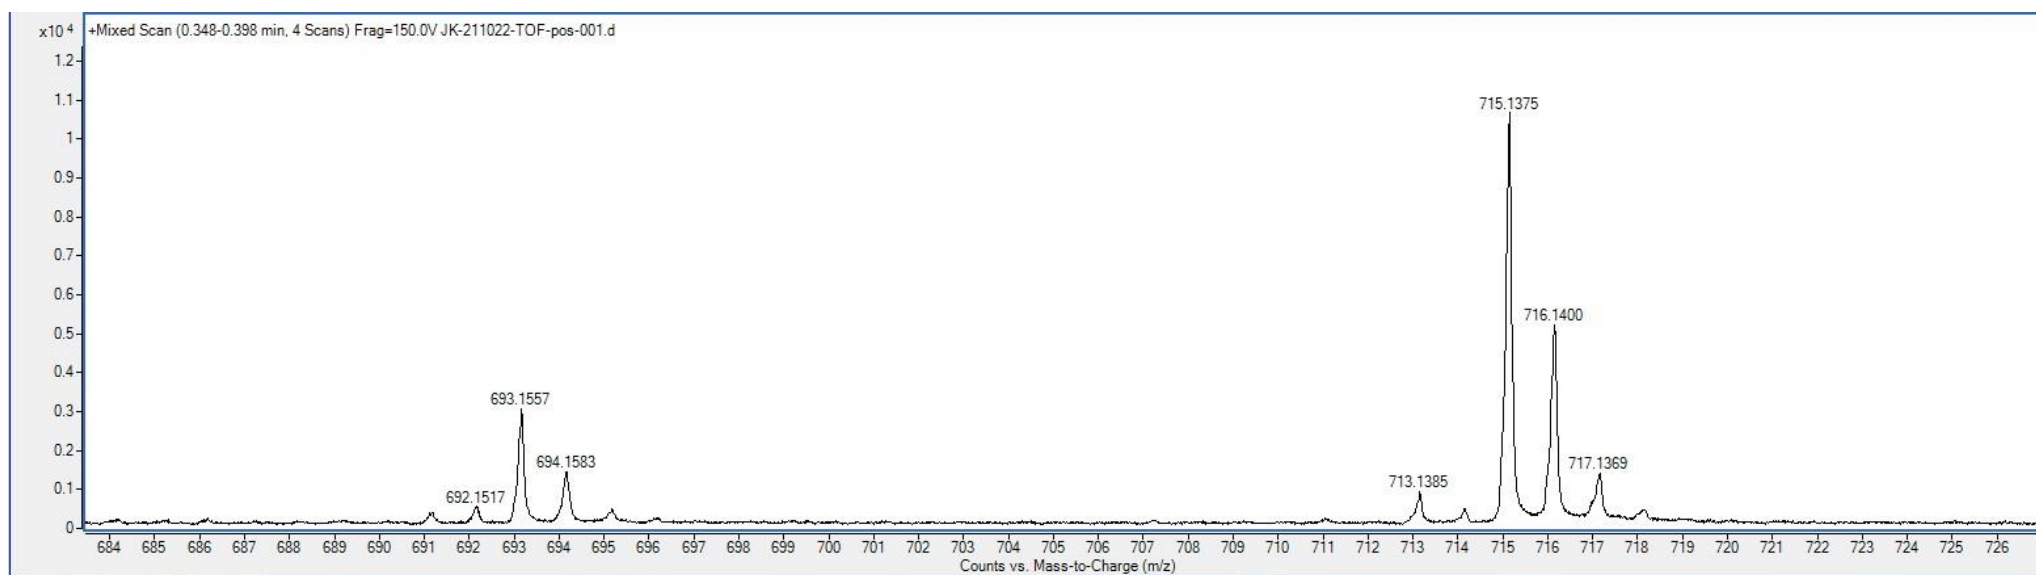

#### 4. Additional analytical data

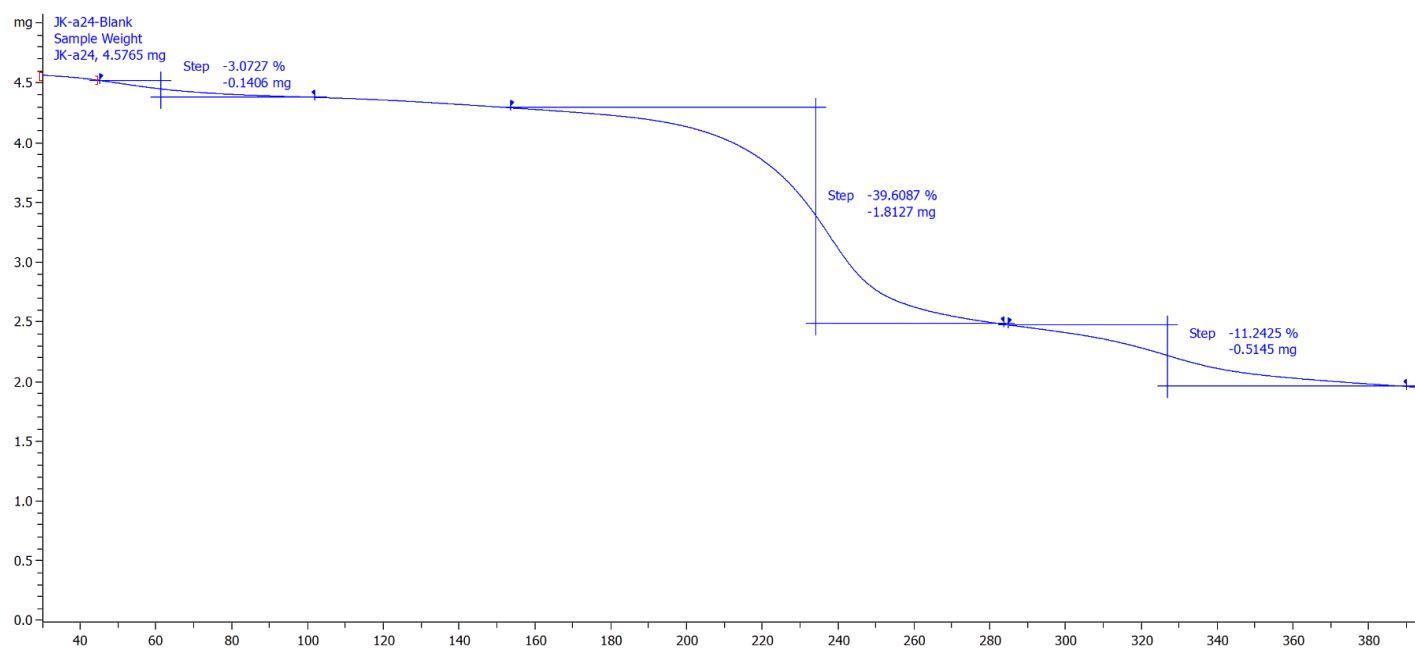

Figure S2. TGA of  $[\text{Ga}(\text{SHAH}_2)(\text{SHAH})]$  (**3**), determining the presence of water in the compound.

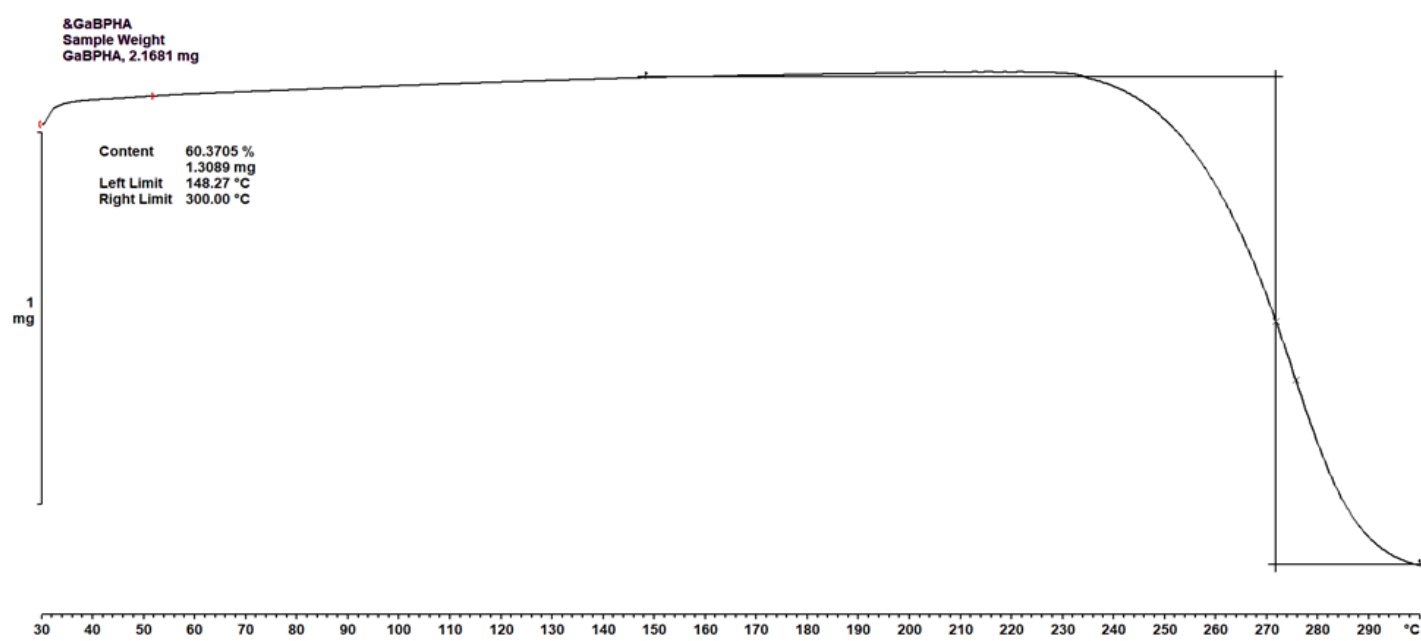

Figure S3. TGA of  $[\text{Ga}(\text{BPHA})_3]$  (**1**)

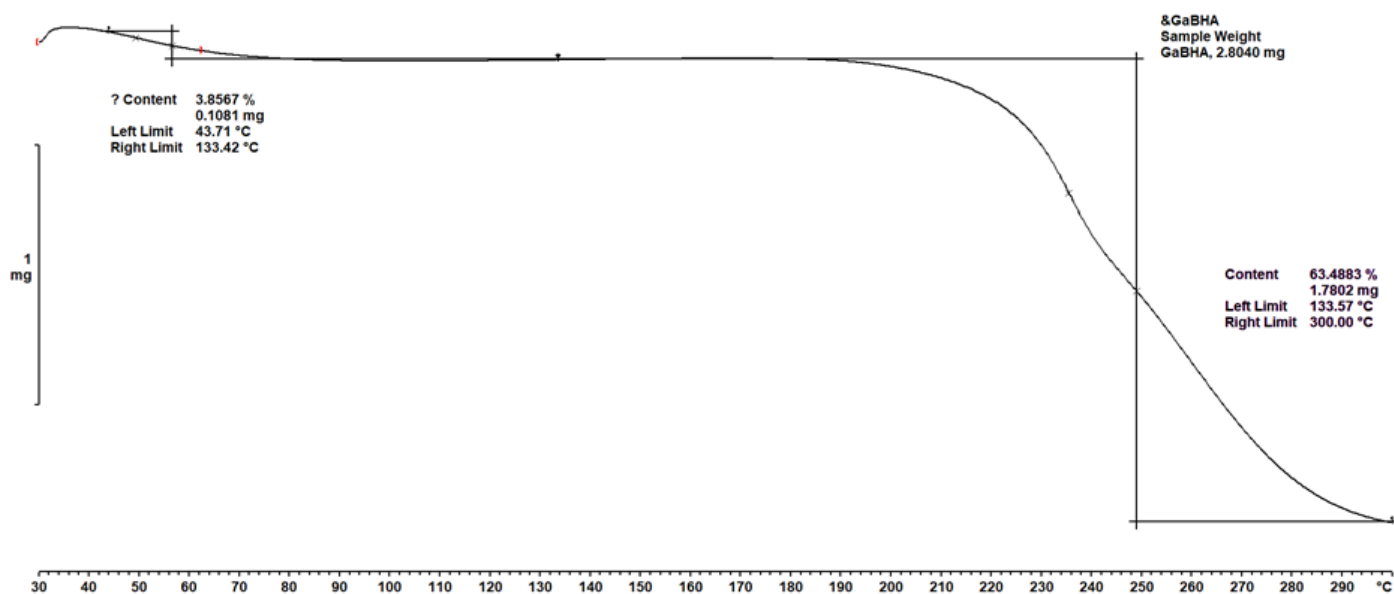

Figure S4. TGA of [Ga(BHA)(BHAH)] (2), determining the presence of water in the compound.

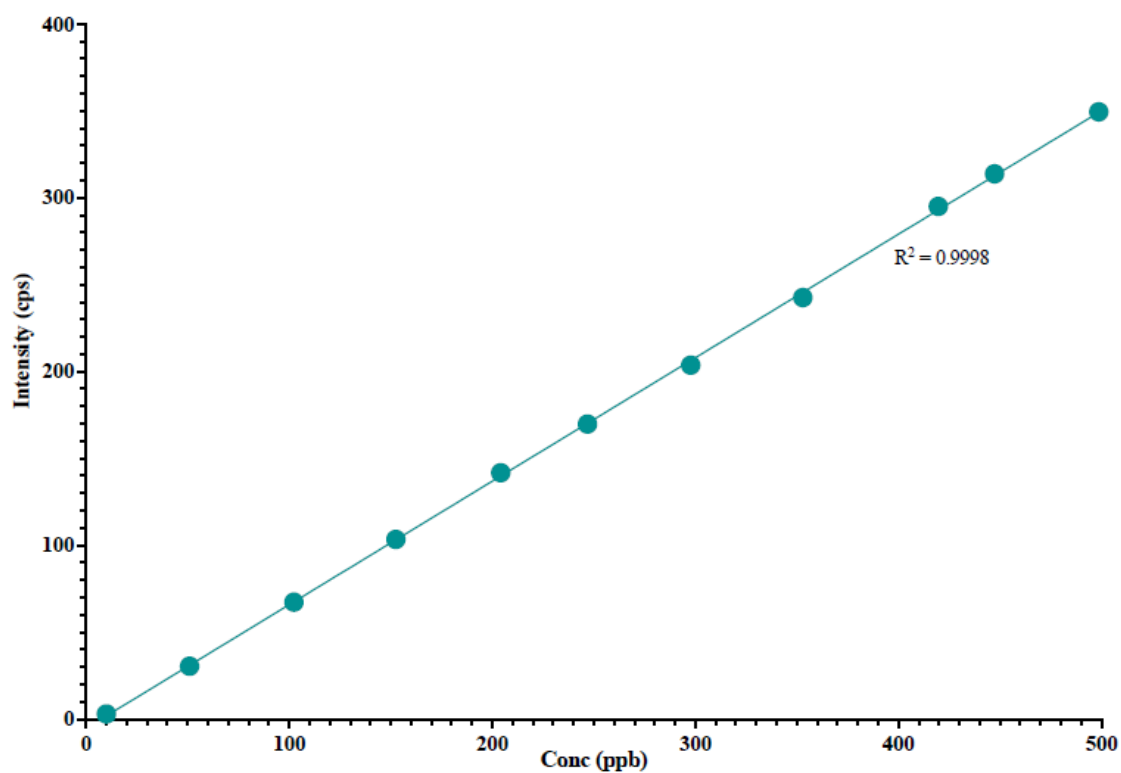

Figure S5. 11-point Gallium-69 calibration curve measured using ICP-MS with an Ag/As internal standard.

## 5. Biological testing

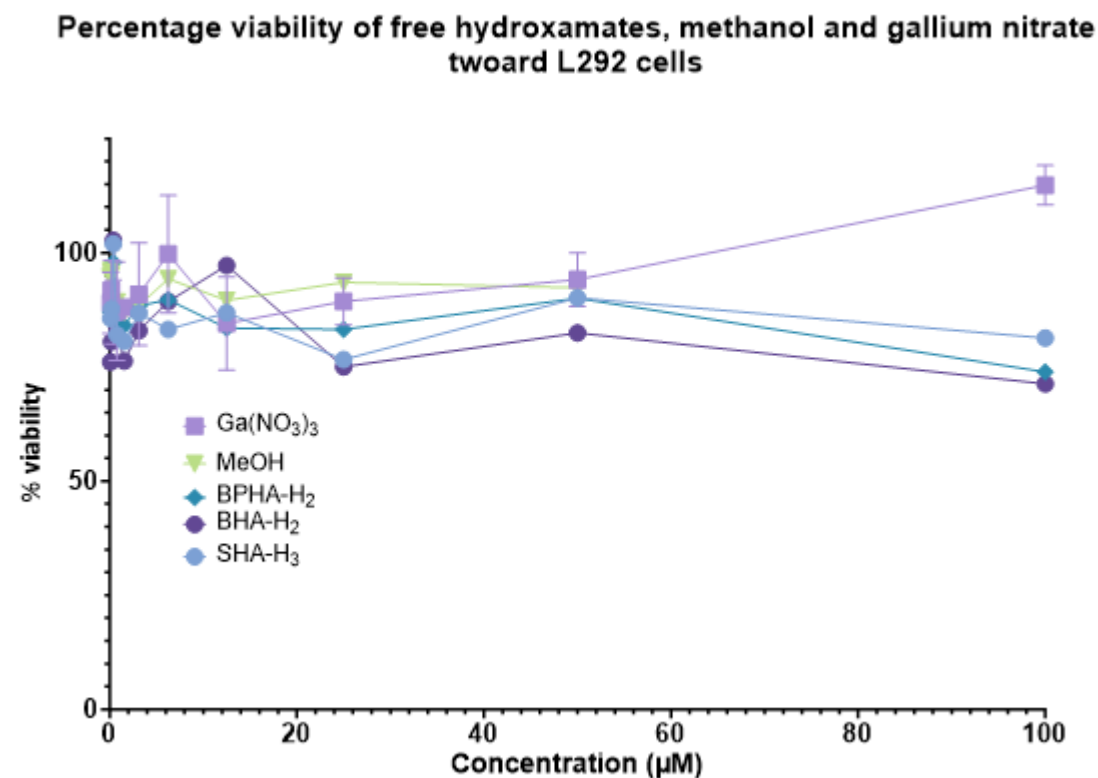

Figure S6. Percentage viability of L929 cells toward controls including free hydroxamic acids: BPHA-H<sub>2</sub>, BHA-H<sub>2</sub>, SHA-H<sub>3</sub> and gallium nitrate and methanol.

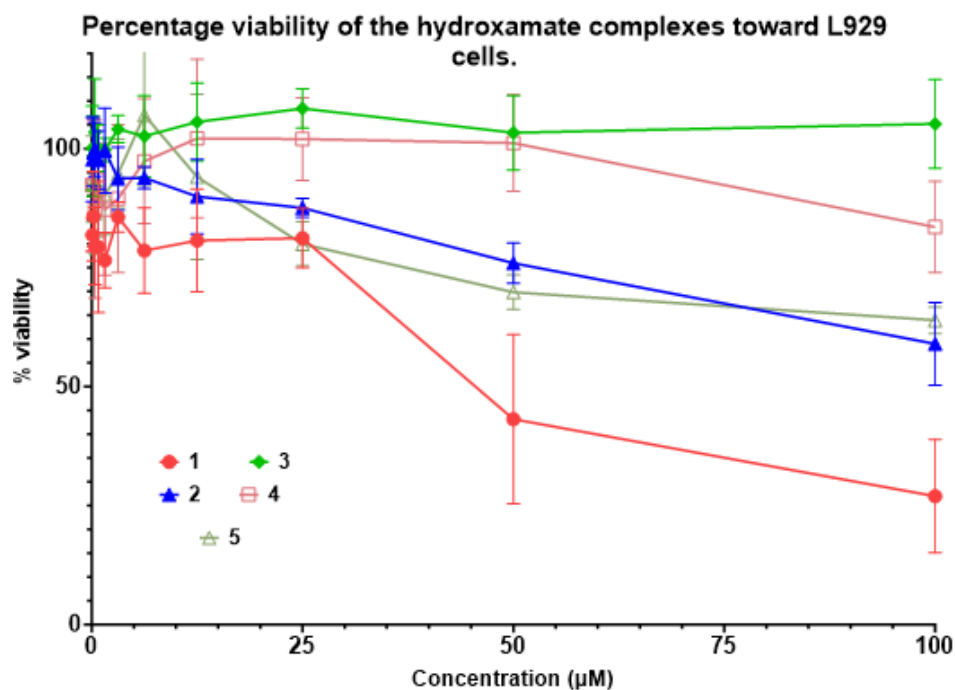

Figure S7. Percentage viability of L929 cells toward gallium complexes [Ga(BPHA)<sub>3</sub>] **1**, [Ga(BHA-H)<sub>3</sub>] **2**, [Ga(SHA-H<sub>2</sub>)(SHA-H)] **3**, [GaMe<sub>2</sub>(BPHA)] **4**, and [GaMe(BHA-H)<sub>2</sub>] **5**.

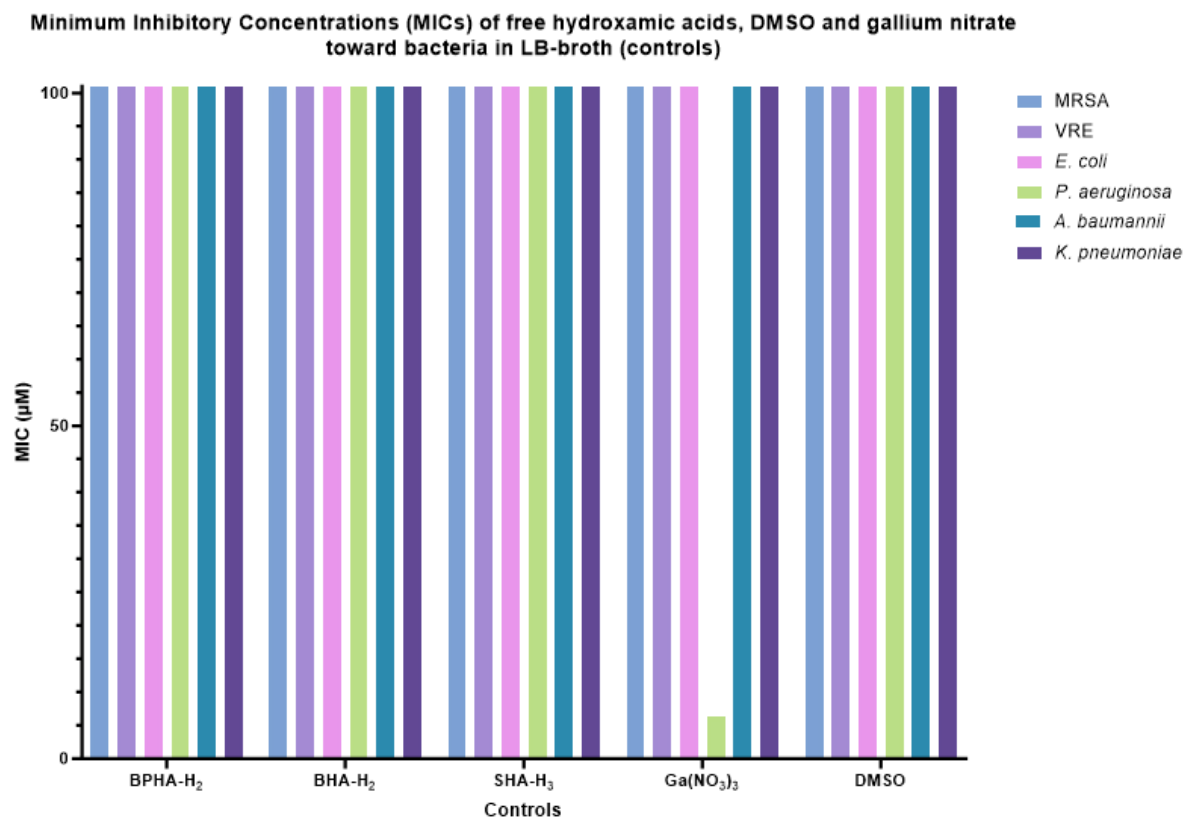

Figure S8. MIC graphs of the controls. including free hydroxamic acids: BPHA-H<sub>2</sub>, BHA-H<sub>2</sub>, SHA-H<sub>3</sub> and gallium nitrate and DMSO

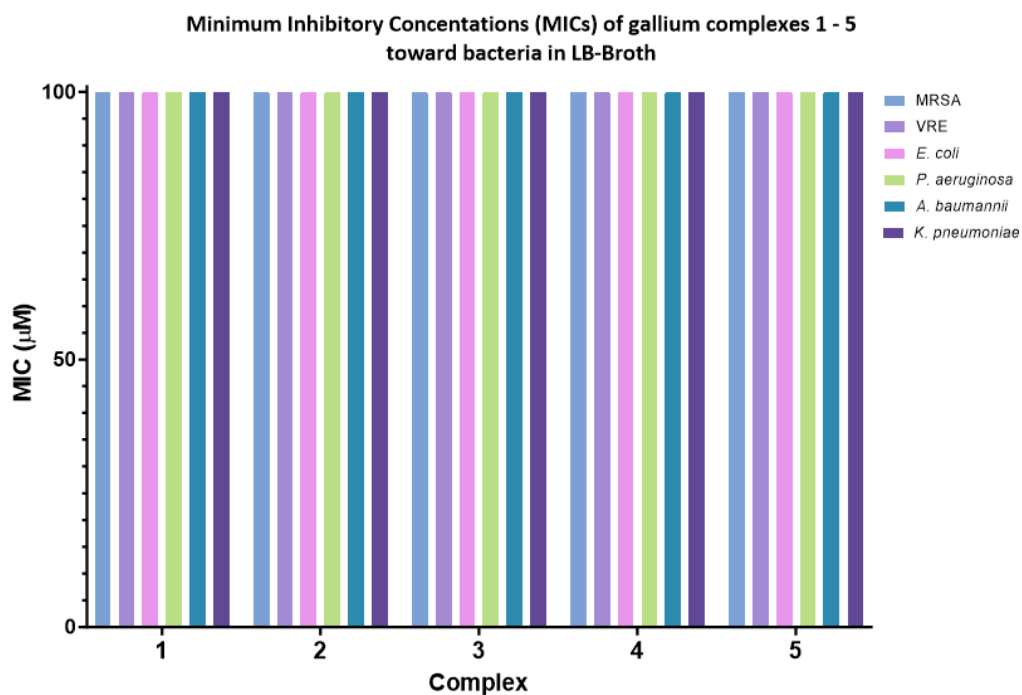

Figure S9. MIC graphs for the gallium complexes [Ga(BPHA)<sub>3</sub>] **1**, [Ga(BHA-H)<sub>3</sub>] **2**, [Ga(SHA-H<sub>2</sub>)(SHA-H)] **3**, [GaMe<sub>2</sub>(BPHA)] **4**, and [GaMe(BHA-H)<sub>2</sub>] **5** in LB-broth

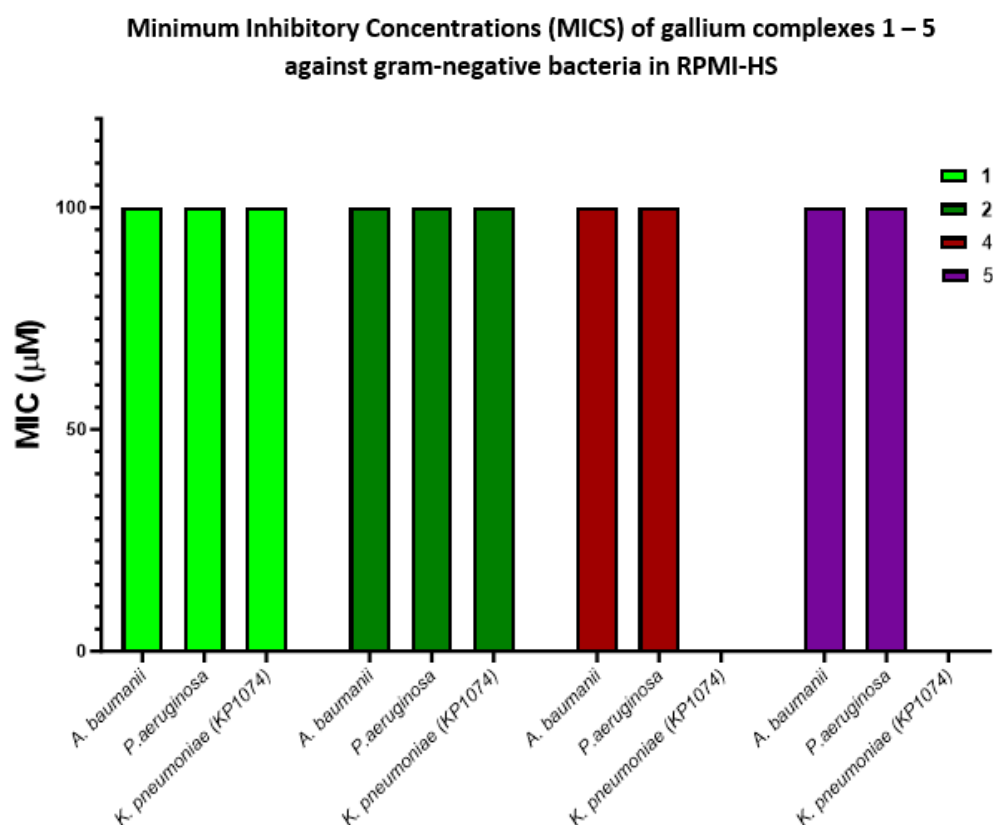

Figure S10. MIC graphs for the gallium complexes  $\text{Ga}(\text{BPHA})_3$  **1**,  $[\text{Ga}(\text{BHA}-H)_3]$  **2**,  $[\text{GaMe}_2(\text{BPHA})]$  **4**, and  $[\text{GaMe}(\text{BHA}-H)_2]$  **5** analysed in RPMI-HS against gram negative bacteria.

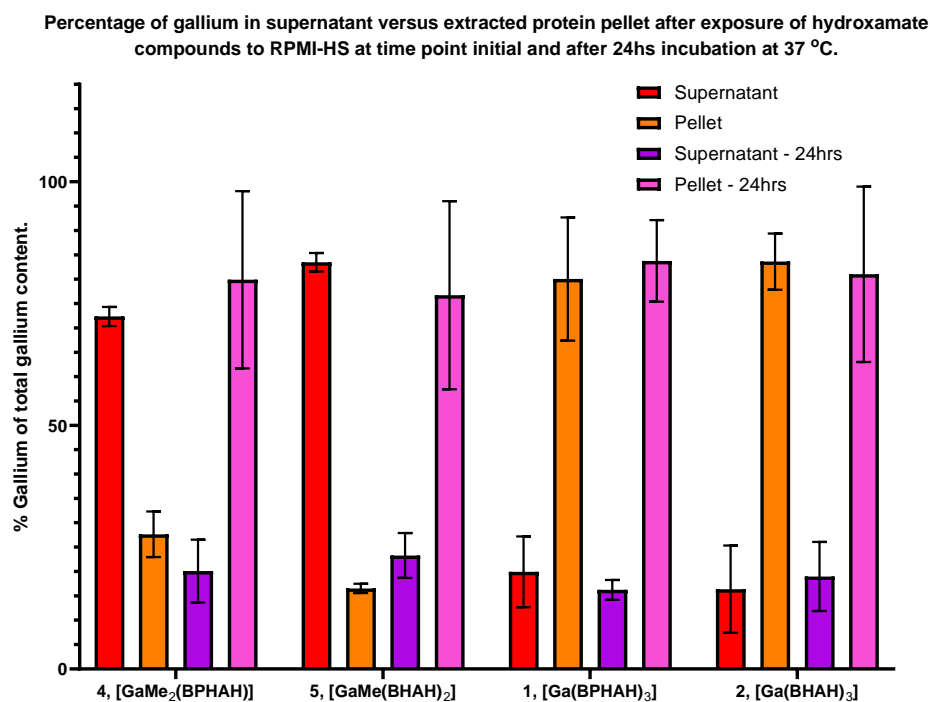

Figure S11. Percentage of gallium observed in the supernatant versus pellet phase of complexes **1**, **2**, **4** and **5**, as a percentage of total gallium in the combined samples. Measurements in triplicate via ICP-MS

## 6. Experimental Section for Complexes 7, 8, 9 and 10

[Ga(BPHA)<sub>2</sub>(OMe)] **7**:

A few milligrams of solid [Ga(BPHA)<sub>3</sub>] **1** was sonicated in *ca.* 50 mL of methanol before filtration. A few colourless hexagonal crystals were obtained following slow evaporation of the solvent. Single crystal X-ray diffraction identified them as the methanolysis product [Ga(BPHA)<sub>2</sub>(OMe)] **7** (Figure S12).

CCDC: 2150393

[Ga<sub>4</sub>(Me)<sub>7</sub>(BPHA)O<sub>4</sub>] **8** and [GaMe(BPHA)<sub>2</sub>] **9**:

Complex **4** [GaMe<sub>2</sub>(BPHA)] was heated under atmospheric conditions in toluene leading to a small degree of ligand redistribution and partial hydrolysis. Some crystals of the cluster compound [Ga<sub>4</sub>(Me)<sub>7</sub>(BPHA)O<sub>4</sub>] **8** (Figure S13) and the mono-methyl gallium complex [GaMe(BPHA)<sub>2</sub>] **9** (Figure S14) were identified via single crystal XRD. CCDC **8**: 2330100. CCDC **9**: 2330099.

[{GaMe<sub>2</sub>(BHA-*H*)}{Ga<sub>2</sub>Me<sub>4</sub>O}], **10**.

During the attempted formation of the dimethylgallium complex of benzohydroxamic acid, [{GaMe<sub>2</sub>(BHA-*H*)] isolated crystals of the polynuclear gallium complex [{GaMe<sub>2</sub>(BHA-*H*)}{Ga<sub>2</sub>Me<sub>4</sub>O}], **10** (Figure S15) were identified by single crystal XRD. CCDC: 2330101.

## 7. X-ray crystallography

Table S1. Detailed bond lengths and angles of **1** and **6**

| 1                |           | 6           |           |
|------------------|-----------|-------------|-----------|
| Bond Lengths (Å) |           |             |           |
| Ga1-O1           | 1.972(18) | Fe1-O1      | 2.002(2)  |
| Ga1-O2           | 1.972(18) | Fe1-O1A     | 2.002(2)  |
| Bond Angles (°)  |           |             |           |
| O1-Ga1-O2        | 81.38(10) | O1-Fe1-O1A  | 78.59(12) |
| O1-Ga1-O1A       | 91.61(8)  | O1-Fe1-O1B  | 92.41(9)  |
| O2-Ga1-O2A       | 96.28(12) | O1A-Fe1-O1B | 98.17(14) |

### Crystallographic data:

Crystallographic data of **1**.  $C_{39}H_{30}N_3O_6Ga$ ,  $M_w = 706.38$ , trigonal, space group  $P\bar{3}c1$ ,  $a = 13.3905(2)$ ,  $b = 13.3905(2)$ ,  $c = 10.3009(3)$  Å,  $\alpha = 90$ ,  $\beta = 90$ ,  $\gamma = 120^\circ$ ,  $V = 1599.56(7)$  Å<sup>3</sup>,  $Z = 2$ , density =  $1.467$  g/cm<sup>3</sup>,  $F_{000} = 728$ ,  $\mu = 1.633$  mm<sup>-1</sup>,  $2\theta_{max} = 155.8^\circ$ , 22506 reflections collected, 1141 unique ( $R_{int} = 0.0651$ ). Final GooF = 1.067,  $R_1 = 0.0532$ ,  $wR_2 = 0.1493$ .

Crystallographic data of **4**.  $C_{22}H_{23}GaN_2O_4$  ( $M = 449.14$  g/mol): tetragonal, space group  $I4_1/a$  (no. 88),  $a = 22.5883(9)$  Å,  $c = 16.7968(10)$  Å,  $V = 8570.3(9)$  Å<sup>3</sup>,  $Z = 16$ ,  $T = 123$  K,  $\mu(MoK\alpha) = 1.314$  mm<sup>-1</sup>,  $D_{calc} = 1.392$  g/cm<sup>3</sup>, 23400 reflections measured ( $4.706^\circ \leq 2\theta \leq 52.91^\circ$ ), 4040 unique ( $R_{int} = 0.0807$ ,  $R_{sigma} = 0.1117$ ) which were used in all calculations. The final  $R_1$  was 0.0295 ( $I > 2\sigma(I)$ ) and  $wR_2$  was 0.0406 (all data).

Crystallographic data of **5**.  $C_{15}H_{16}GaNO_2$  ( $M = 312.01$  g/mol): monoclinic, space group  $P2_1/n$  (no. 14),  $a = 9.7967(3)$  Å,  $b = 13.9100(3)$  Å,  $c = 10.3884(3)$  Å,  $\beta = 93.174(2)^\circ$ ,  $V = 1413.48(7)$  Å<sup>3</sup>,  $Z = 4$ ,  $T = 123.00(10)$  K,  $\mu(Mo K\alpha) = 1.943$  mm<sup>-1</sup>,  $D_{calc} = 1.466$  g/cm<sup>3</sup>, 19008 reflections measured ( $6.288^\circ \leq 2\theta \leq 62.008^\circ$ ), 4017 unique ( $R_{int} = 0.0404$ ,  $R_{sigma} = 0.0363$ ) which were used in all calculations. The final  $R_1$  was 0.0303 ( $I > 2\sigma(I)$ ) and  $wR_2$  was 0.0741 (all data).

Crystallographic data of **6**.  $C_{39}H_{30}N_3O_6Fe$ ,  $M_w = 692.51$ , trigonal, space group  $P-3c1$  (no. 165),  $a = 13.4603(9)$  Å,  $c = 10.2309(8)$  Å,  $V = 1605.3(2)$  Å<sup>3</sup>,  $Z = 12$ ,  $T = 123.00(10)$  K,  $\mu(MoK\alpha) = 0.525$  mm<sup>-1</sup>,  $D_{calc} = 1.433$  g/cm<sup>3</sup>, 14649 reflections measured ( $6.992^\circ \leq 2\theta \leq 64.472^\circ$ ), 1712 unique ( $R_{int} = 0.1003$ ,

$R_{\text{sigma}} = 0.0672$ ) which were used in all calculations. The final  $R_1$  was 0.0851 ( $I > 2\sigma(I)$ ) and  $wR_2$  was 0.2700 (all data).

Crystallographic data of **7**:  $\text{C}_{27}\text{H}_{23}\text{Ga}\text{N}_2\text{O}_5$  ( $M = 525.19$  g/mol): monoclinic, space group  $P2_1/c$  (no. 14),  $a = 10.5325(5)$  Å,  $b = 20.4336(8)$  Å,  $c = 11.6318(6)$  Å,  $\beta = 93.511(5)^\circ$ ,  $V = 2498.7(2)$  Å<sup>3</sup>,  $Z = 4$ ,  $T = 123.01(10)$  K,  $\mu(\text{MoK}\alpha) = 1.141$  mm<sup>-1</sup>,  $D_{\text{calc}} = 1.396$  g/cm<sup>3</sup>, 21381 reflections measured ( $6.702^\circ \leq 2\theta \leq 51.978^\circ$ ), 4875 unique ( $R_{\text{int}} = 0.0902$ ,  $R_{\text{sigma}} = 0.0820$ ) which were used in all calculations. The final  $R_1$  was 0.0910 ( $I > 2\sigma(I)$ ) and  $wR_2$  was 0.1690 (all data).

Crystallographic data of **8**:  $\text{C}_{40}\text{H}_{62}\text{Ga}_8\text{N}_2\text{O}_8$ ,  $Mr = 1256.67$ , triclinic,  $P-1$  (No. 2),  $a = 9.76440(10)$  Å,  $b = 12.35930(10)$  Å,  $c = 22.2325(3)$  Å,  $\alpha = 85.4710(10)^\circ$ ,  $\beta = 86.0980(10)^\circ$ ,  $\gamma = 77.3800(10)^\circ$ ,  $V = 2606.49(5)$  Å<sup>3</sup>,  $T = 123.00(10)$  K,  $Z = 2$ ,  $Z' = 1$ ,  $\lambda(\text{Cu K}\alpha) = 0.71073$ , 54923 reflections measured, 11188 unique ( $R_{\text{int}} = 0.0673$ ) which were used in all calculations. The final  $wR_2$  was 0.1285 (all data) and  $R_1$  was 0.0451 ( $I > 2(I)$ ).

Crystallographic data of **9**:  $\text{C}_{27}\text{H}_{23}\text{Ga}\text{N}_2\text{O}_4$ ,  $Mr = 509.19$ , space group  $P2_1/c$  (no. 14),  $a = 14.3324(3)$  Å,  $b = 9.3198(2)$  Å,  $c = 18.1798(4)$  Å,  $\alpha = 90^\circ$ ,  $\beta = 98.6^\circ$ ,  $\gamma = 90^\circ$ ,  $V = 2400.77(9)$  Å<sup>3</sup>,  $T = 123.01(13)$  K,  $Z = 4$ ,  $Z' = 1$ ,  $\lambda(\text{Cu K}\alpha) = 0.71073$ , 31646 reflections measured, 6818 unique ( $R_{\text{int}} = 0.0565$ ) which were used in all calculations. The final  $wR_2$  was 0.0891 (all data) and  $R_1$  was 0.0393 ( $I > 2(I)$ ).

Crystallographic data of **10**:  $\text{C}_{13}\text{H}_{24}\text{Ga}_3\text{NO}_3$ ,  $Mr = 451.49$ , orthorhombic,  $Pbca$  (No. 61),  $a = 6.9024(2)$  Å,  $b = 14.1349(4)$  Å,  $c = 37.0932(11)$  Å,  $\alpha = \beta = \gamma = 90^\circ$ ,  $V = 3618.99(18)$  Å<sup>3</sup>,  $T = 122.99(11)$  K,  $Z = 8$ ,  $Z' = 1$ ,  $\lambda(\text{Cu K}\alpha) = 0.71073$ , 19330 reflections measured, 3852 unique ( $R_{\text{int}} = 0.0576$ ) which were used in all calculations. The final  $wR_2$  was 0.1069 (all data) and  $R_1$  was 0.0429 ( $I > 2(I)$ ).

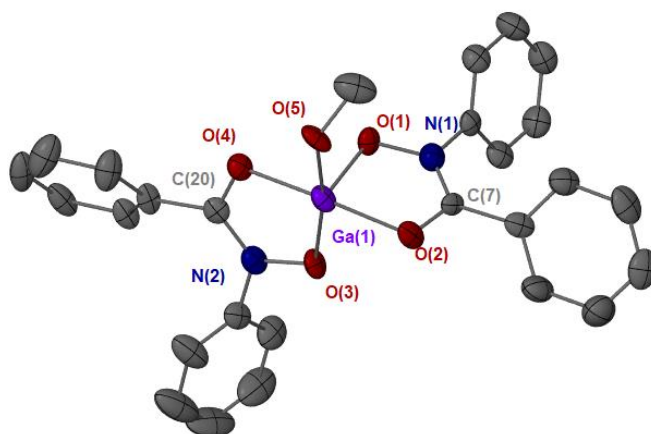

Figure S12. Solid-state structure of  $[\text{Ga}(\text{OMe})(\text{BPHA})_2]$ , **7**, as determined by single crystal X-ray diffraction with images generated in Mercury. Thermal ellipsoids at 50 % probability. Hydrogen atoms have been omitted for clarity. Dihydrate in the **7** structure has been omitted for clarity. Selected bond lengths are found in Table 5. Selected bond angles ( $^\circ$ ) for **7**: O1-Ga1-O2, 79.62(18), O1-Ga1-O3, 96.53(18), O1-Ga1-O4, 169.5(16), O1-Ga1-O5, 92.32(17), O1-Ga1-O6, 90.29(18).

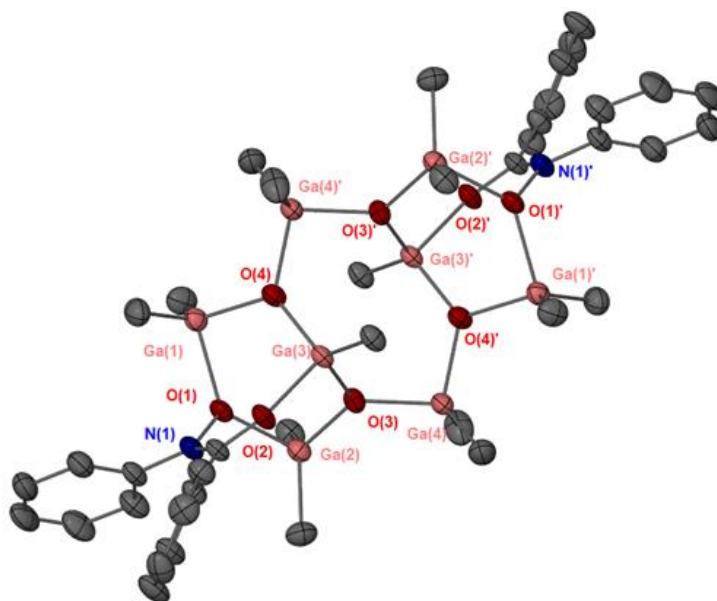

Figure S13. Grown structure of **8**, highlighting the formation of the macrocycle. Thermal ellipsoids at 50%, hydrogen atoms omitted for clarity. Selected bond lengths ( $\text{\AA}$ ) and angles ( $^\circ$ ): Ga(1) – O(1), 2.051(2), Ga(1) – O(4), 1.888(2), Ga(1) – C(14) 1.954(4), Ga(1) – C(15), 1.961(4), Ga(2) – O(1), 2.047(2), Ga(2) – O(3), 1.881(2), Ga(3) – O(2), 1.992(2), Ga(3) – O(3), 1.855(2), Ga(3) – O(4), 1.852(2), Ga(4) – O(3), 1.920(2), Ga(4) – O(4'), 1.914(2). O(4) – Ga(1) – O(1), 92.93(10), O(4) – Ga(1) – C(14), 106.3(2), C(14) – Ga(1) – C(15), 127.9(2), O(3) – Ga(2) – O(2), 94.25(1), Ga(1) – O(1) – Ga(2), 130.5(1), Ga(2) – O(3) – Ga(4), 121.8(1), O(3) – Ga(4) – O(4'), 98.05(1), O(4) – Ga(3) – O(3), 104.5(1). Symmetry operator:  $^11\text{-X}, 1\text{-Y}, 2\text{-Z}$ ;  $^21\text{-X}, 1\text{-Y}, 1\text{-Z}$ .

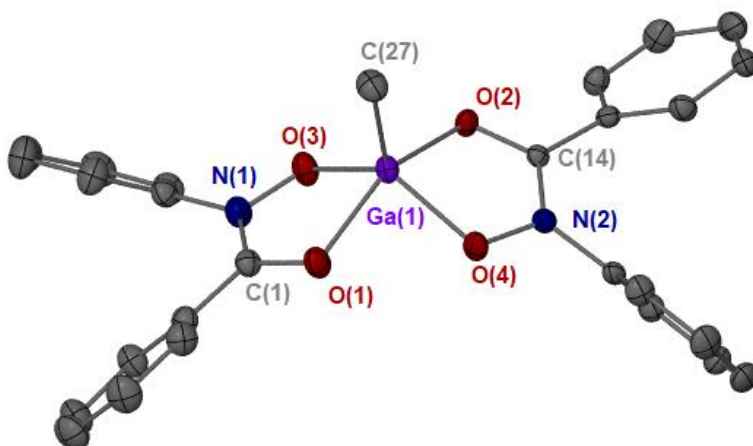

Figure S14. Crystal structure of complex **9**,  $[\text{GaMe}(\text{BPHAH})_2]$ , a redistribution product of **4**. Thermal ellipsoids at 50%, hydrogen atoms omitted for clarity. Selected bond lengths (Å) and angles (°): Ga(1) – O(1), 2.024(1), Ga(1) – O(2), 2.202(1), Ga(1) – O(3), 1.932(1), Ga(1) – O(4), 1.932(1), Ga(1) – C(27), 1.958(2). O(1) – Ga(1) – O(2), 150.3(1), O(1) – Ga(1) – O(4) 83.98(6), O(1) – Ga(1) – O(3) 80.91(6), C(27) – Ga(1) – O(1), 114.3(1).

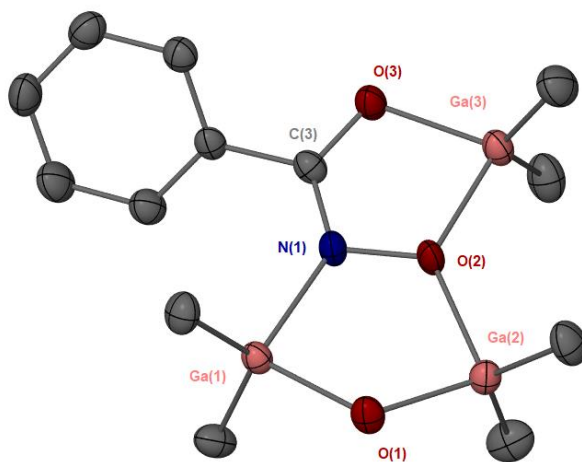

Figure S15. Structure of **10**,  $[(\text{Ga}(\text{Me})_2\text{BHAH})(\text{Ga}_2(\text{Me})_4\text{O})]$ . Thermal ellipsoids at 50%, hydrogen atoms omitted for clarity. Selected bond lengths (Å) and angles (°): Ga(1) – O(1), 1.924(3), Ga(1) – N(1), 2.067(3), Ga(2) – O(1), 1.904(4), Ga(2) – O(2), 1.999(3), Ga(3) – O(2), 1.972(3), Ga(3) – O(3), 1.958(3). Ga(1) – C(1), 1.957(4), Ga(1) – C(2) 1.954(4), Ga(2) – C(1), 1.955(4), Ga(2) – C(11), 1.950(5), Ga(3) – C(12), 1.956(5), Ga(3) – C(13), 1.954(5). O(1) – Ga(1) – N(1), 91.30(12), O(1) – Ga(1) – C(1), 104.9(2), C(1) – Ga(1) – C(2), 126.2(2), Ga(2) – O(1) – Ga(1), 119.1(2), O(1) – Ga(2) – O(2), 90.57(12), O(2) – Ga(3) – O(3), 80.80(11), Ga(3) – O(2) – Ga(2), 127.3(1).

## 8. Biological images

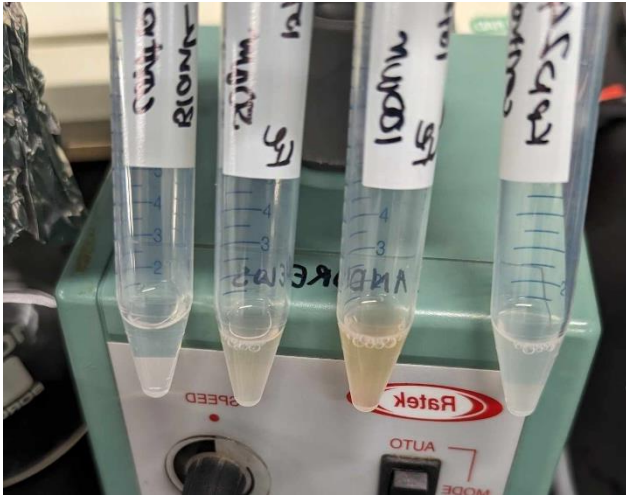

Biological sample of complex **6** at maximum concentration exhibiting no change to opacity when compared to the positive control for *Klebsiella Pneumoniae* KP1074.

Left to right: negative control (clear), **6** 100 µM (opaque), **6** (opaque) 50 µM, positive control (opaque)

Biological sample of complex **1** at minimum inhibitory concentration highlighting the change in opacity to clear when compared to the positive control for *Klebsiella Pneumoniae* KP1074.

Left to right: **1** 0.78 µM (clear), positive control (opaque)

**\*note label on tubes does not correspond to complex 1**

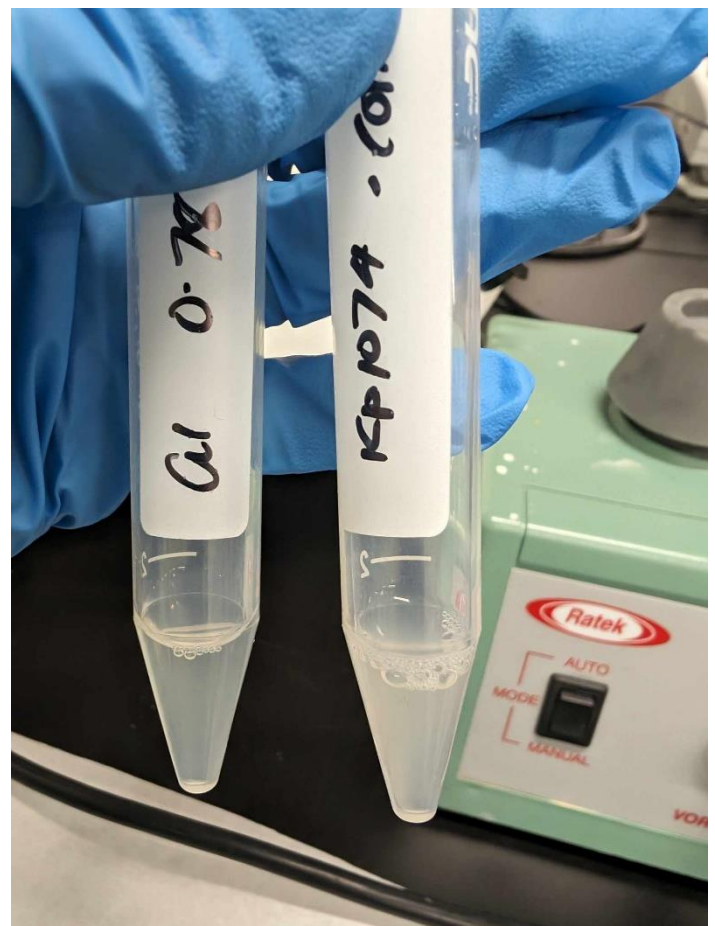

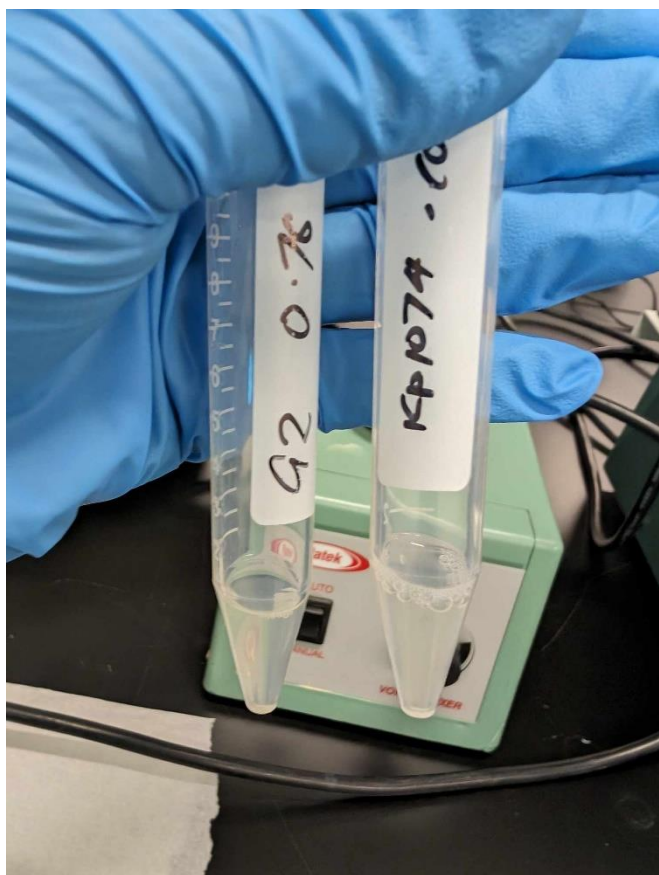

Biological sample of complex **5** at minimum inhibitory concentration highlighting the change in opacity to clear when compared to the positive control for *Klebsiella Pneumoniae* KP1074.

Left to right: **5** 0.78  $\mu$ M (clear), positive control (opaque)

**\*note label on tubes does not correspond to complex 2.**

Biological sample of control GaMe<sub>2</sub>OH double the concentration of **4** and **5** highlighting no change in opacity when compared to the positive control for *Klebsiella Pneumoniae* KP1074.

Left to right: GaMe<sub>2</sub>OH 0.159  $\mu$ M (clear), positive control (opaque)

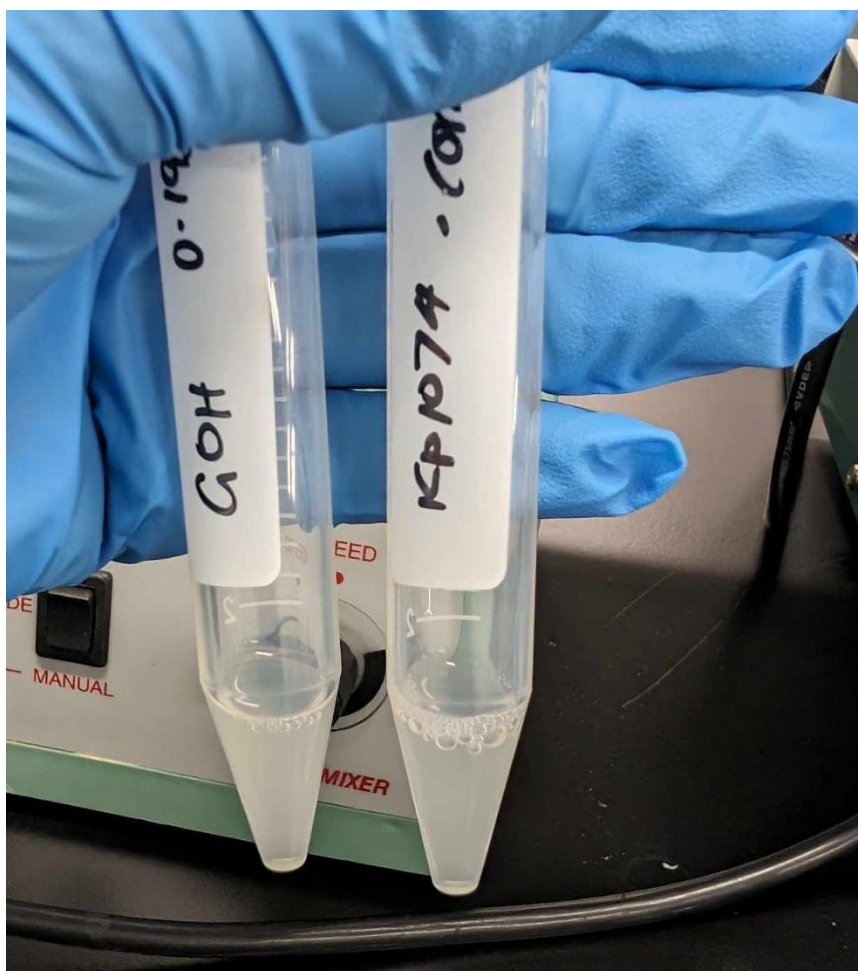

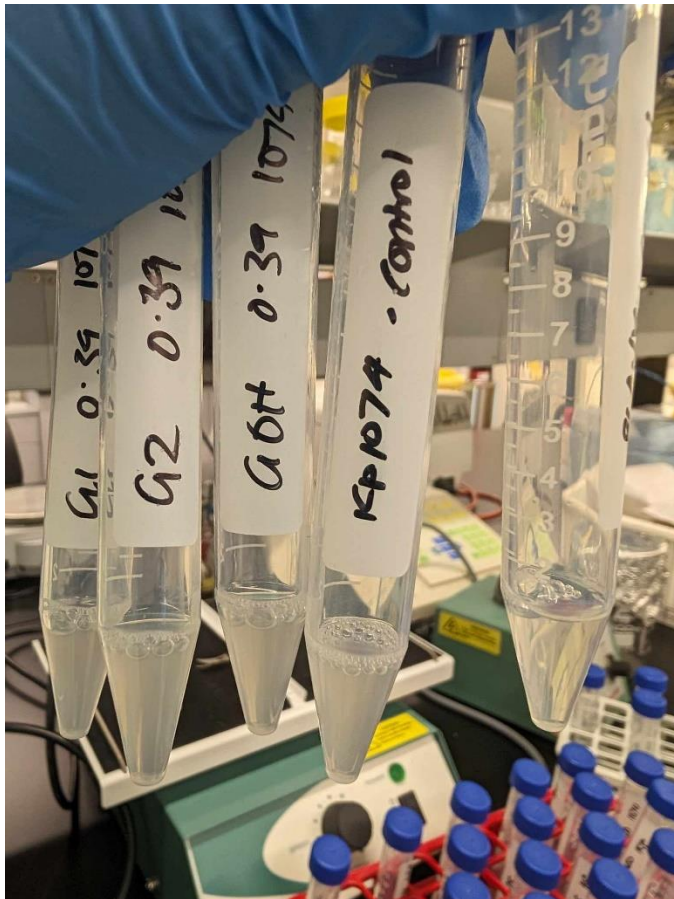

Biological sample of **4**, **5** and control GaMe<sub>2</sub>OH at the lowest concentration highlighting no change in opacity when compared to the positive control for *Klebsiella Pneumoniae* KP1074.

Left to right: **4** 0.39  $\mu$ M (opaque), **5** 0.39  $\mu$ M (opaque), GaMe<sub>2</sub>OH 0.39  $\mu$ M (opaque), positive control (opaque).

***\*note label on tubes does not correspond to complexes 1 and 2.***
